# Supplementary material for: Adiabatic deprotonation as an important competing pathway to ESIPT in photoacidic 2-phenylphenols
Source: Royal Society of Chemistry journal article supplement (doi:10.1039/c9cp02028d), 2019-01-01
Supplement: c9cp02028d1.pdf [file c9cp02028d1.pdf]

# **Adiabatic Deprotonation as an Important Competing Pathway to ESIPT in Photoacidic 2-Phenylphenols**

Leandro D. Mena,<sup>a\*</sup> María T. Baumgartner,<sup>a</sup> D. M. A. Vera,<sup>b</sup> Liliana B. Jimenez<sup>a\*</sup>

<sup>a</sup> INFIQC, Departamento de Química Orgánica, Facultad de Ciencias Químicas, Universidad Nacional de Córdoba, Ciudad Universitaria, X5000HUA, Córdoba, Argentina

<sup>b</sup> Departamento de Química, Facultad de Ciencias Exactas y Naturales, Universidad Nacional de Mar del Plata, Mar del Plata, Argentina.

**SUPPORTING INFORMATION**

## INDEX

### 1. *Experimental Information*

MS analyses of irradiated compounds **1**, **2**, **5** and **6**. S3

### 2. *NMR spectra*

<sup>1</sup>H NMR spectrum of [**1,1'**-biphenyl]-**2-ol**, (*o*-phenylphenol) (**1**) S4

<sup>1</sup>H NMR spectrum of [**1,1'**-biphenyl]-**2-ol** (**1**) after photolysis S5

<sup>1</sup>H NMR spectrum of **5-Methoxy**-[**1,1'**-biphenyl]-**2-ol** (**2**) S6-7

<sup>1</sup>H NMR spectrum of **5-Methoxy**-[**1,1'**-biphenyl]-**2-ol** (**2**) after photolysis S8-9

<sup>1</sup>H NMR and COSY spectra of **5-(tert-Butyl)**-[**1,1'**-biphenyl]-**2-ol** (**3**) S10-11

<sup>1</sup>H NMR spectrum of **5-(tert-Butyl)**-[**1,1'**-biphenyl]-**2-ol** (**3**) after photolysis S12

<sup>1</sup>H NMR spectrum of **6-Hydroxy**-[**1,1'**-biphenyl]-**3-carboxylic acid** S13-14

<sup>1</sup>H NMR spectrum of **2-Hydroxy**-[**1,1'**-biphenyl]-**3-carboxylic acid** after photolysis S15

<sup>1</sup>H NMR, <sup>13</sup>C NMR and 2D NMR spectra of **Methyl 6-hydroxy**-[**1,1'**-biphenyl]-**3-carboxylate** (**4**) S16-S20

<sup>1</sup>H NMR spectrum of **6-Hydroxy**-[**1,1'**-biphenyl]-**3-carbonitrile** (**5**) S21

<sup>1</sup>H NMR spectrum of **6-Hydroxy**-[**1,1'**-biphenyl]-**3-carbonitrile** (**5**) after photolysis S22

<sup>1</sup>H NMR and <sup>13</sup>C NMR spectra of **3,5-di-tert-Butyl**-[**1,1'**-biphenyl]-**2-ol** (**6**) S23-24

<sup>1</sup>H NMR, <sup>13</sup>C NMR and 2D NMR spectra of **3,5-di-tert-Butyl**-[**1,1'**-biphenyl]-**2-ol** (**6**) after photolysis S25-29

### 3. *UV-visible absorption and fluorescence spectra*

3.1. UV-Visible absorption spectra at different pH S30-31

3.2. Determination of pK<sub>a</sub> by UV-visible absorption. S32

3.3. Emission fluorescence spectra at different pH S33

3.4. Emission fluorescence spectra at different solvents. S34

3.5. Fluorescence lifetimes of compounds **1**, **2** and **5**. S34-35

### 4. *Theoretical Calculations*

4.1 pK<sub>a</sub> Calculation S36

4.2 pK<sub>a</sub>\* Calculation S37

|                                                       |        |
|-------------------------------------------------------|--------|
| 4.3 Theoretical modeling of ESIPT process             | S38    |
| 4.3.1. <i>Potential energy surfaces</i>               | S39    |
| 4.3.2 <i>Vertical excitations</i>                     | S40-41 |
| 4.3.3 <i>Non-covalent interactions (NCI) analysis</i> | S42    |
| 4.3.4 <i>IR frequencies</i>                           | S43    |
| 4.3.5 <i>Relevant optimized structures</i>            | S44    |
| 4.4 XYZ coordinates of all stationary points          | S46-65 |

## 1. Experimental Information

### - MS analyses of irradiated compounds 1, 2, 5 and 6.

#### **[1,1'-biphenyl]-2-ol (1) after photolysis in CH<sub>3</sub>CN:D<sub>2</sub>O (3:1).**

A 15,2 mg sample of **1** in 40 mL of CH<sub>3</sub>CN:D<sub>2</sub>O (1:3) solution was irradiated for 60 min. <sup>1</sup>H NMR analysis showed an overall exchange of 27 % over possible 2'- and 4'-positions,<sup>1</sup> with 40% deuterium incorporation at 2'-position. Incorporation of deuterium at 4'-position was not detected. MS (after <sup>13</sup>C correction) indicated an overall exchange of 22%. Relative product distribution obtained: **1** (51%), **1-D** (34%), **1-D<sub>2</sub>** (14%), and **1-D<sub>3</sub>** (1%).<sup>2</sup>

#### **5-Methoxy-[1,1'-biphenyl]-2-ol (2) after photolysis in CH<sub>3</sub>CN:D<sub>2</sub>O (3:1).**

A 12 mg sample of **2** in 27 mL of CH<sub>3</sub>CN:D<sub>2</sub>O (1:3) solution was irradiated for 60 min. <sup>1</sup>H NMR analysis showed an overall exchange of 29 % over possible 2'- and 4'-positions,<sup>1</sup> with 44% deuterium incorporation at 2'-position. Incorporation of deuterium at 4'-position was not detected. MS (after <sup>13</sup>C correction) indicated an overall exchange of 29%. Relative product distribution obtained: **2** (34%), **2-D** (44%) and **2-D<sub>2</sub>** (22%).<sup>2</sup>

#### **6-Hydroxy-[1,1'-biphenyl]-3-carbonitrile (5) after photolysis in CH<sub>3</sub>CN:D<sub>2</sub>O (3:1).**

A 20 mg sample of **5** in 46,4 mL of CH<sub>3</sub>CN:D<sub>2</sub>O (1:3) solution was irradiated for 60 min. <sup>1</sup>H NMR analysis showed an overall exchange of 3 % over possible 2'- and 4'-positions,<sup>1</sup> with 4% deuterium incorporation at 2'-position. Incorporation of deuterium at 4'-position was not detected. MS (after <sup>13</sup>C correction) indicated an overall exchange of 5%. Relative product distribution obtained: **5** (84%), **5-D** (14%) and **5-D<sub>2</sub>** (2%).<sup>2</sup>

#### **3,5-di-tert-Butyl-[1,1'-biphenyl]-2-ol (6) after photolysis in CH<sub>3</sub>CN:D<sub>2</sub>O (3:1).**

A 15 mg sample of **6** in 24 mL of CH<sub>3</sub>CN:D<sub>2</sub>O (1:3) solution was irradiated for 60 min. <sup>1</sup>H NMR analysis showed an overall exchange of 67 % over possible 2'- and 4'-positions,<sup>1</sup> with 100% deuterium incorporation at 2'-position. MS (after <sup>13</sup>C correction) indicated an overall exchange of 67%. Relative product distribution obtained: **6** (1%), **6-D** (3%), **6-D<sub>2</sub>** (83%), and **6-D<sub>3</sub>** (11%).<sup>2</sup>

---

<sup>1</sup> Average overall deuterium incorporation (NMR), calculated as  $[2(\%D-2') + (\%D-4')]/3$ .

<sup>2</sup> Average overall deuterium incorporation (MS), calculated as  $[1(\%1-D) + 2(\%2-D) + 3(\%3-D)]/3$ .

## 2. NMR spectra

[1,1'-biphenyl]-2-ol (*o*-phenylphenol) (1)

$^1\text{H}$  NMR (400 MHz,  $(\text{CD}_3)_2\text{CO}$ )

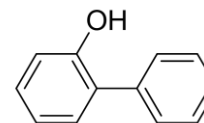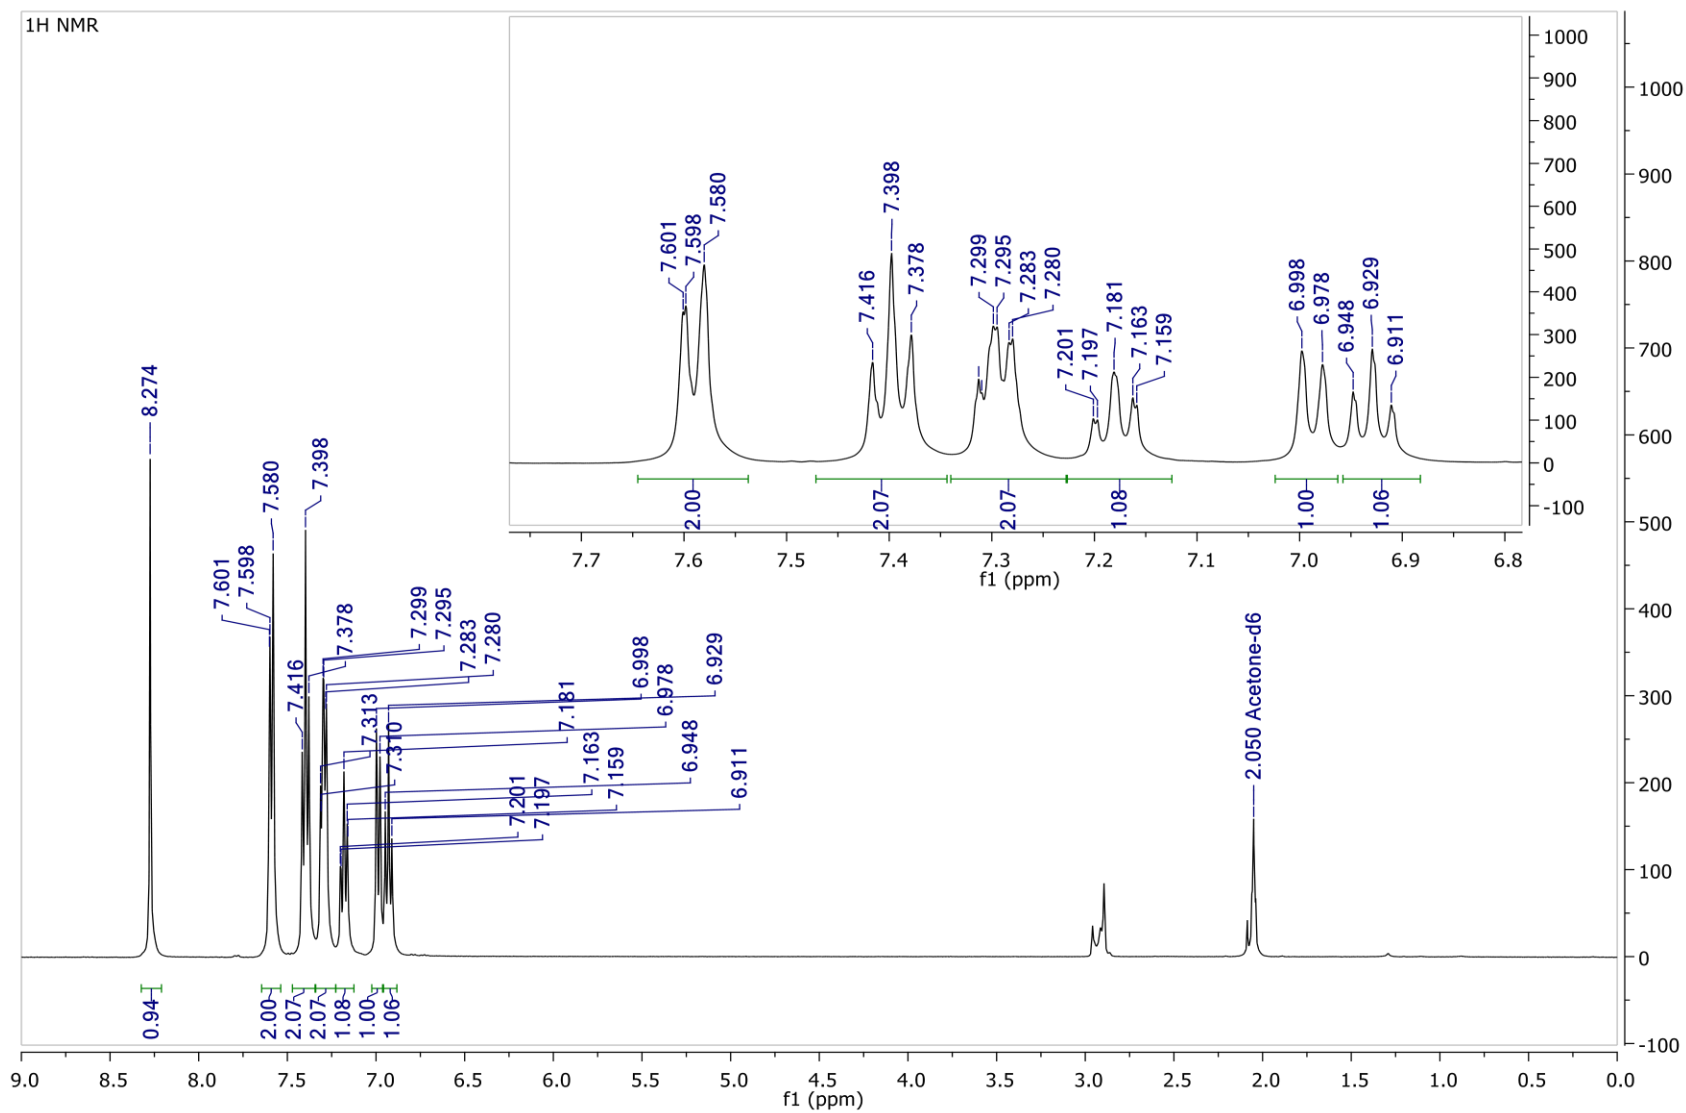

[1,1'-biphenyl]-2-ol (1) after photolysis in CH<sub>3</sub>CN:D<sub>2</sub>O (3:1)

<sup>1</sup>H NMR (400 MHz, (CD<sub>3</sub>)<sub>2</sub>CO)

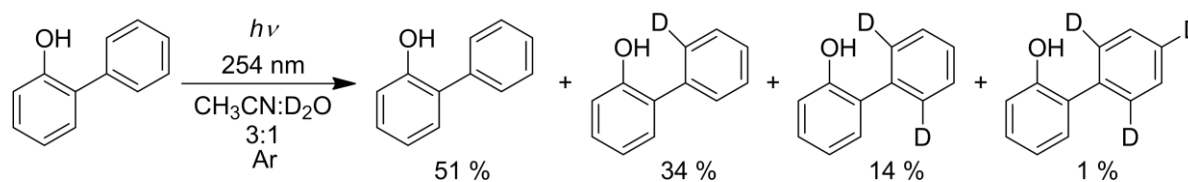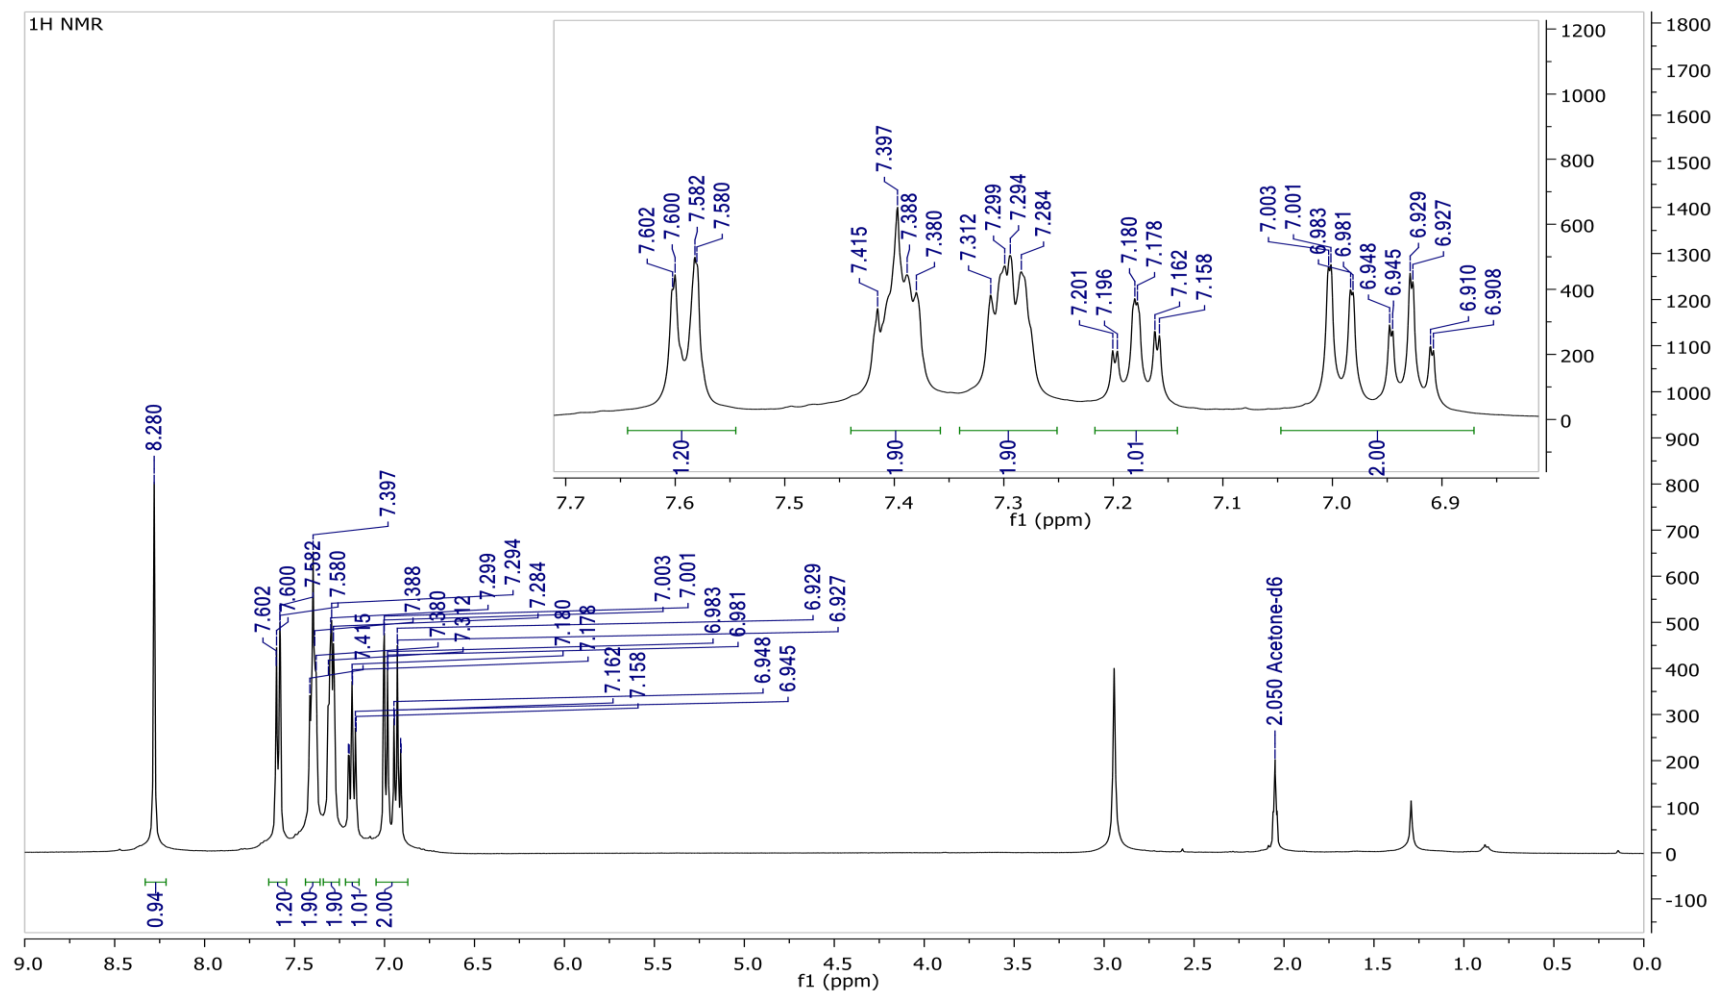

# 5-Methoxy-[1,1'-biphenyl]-2-ol (2)

$^1\text{H}$  NMR (400 MHz,  $(\text{CD}_3)_2\text{CO}$ )

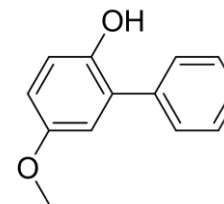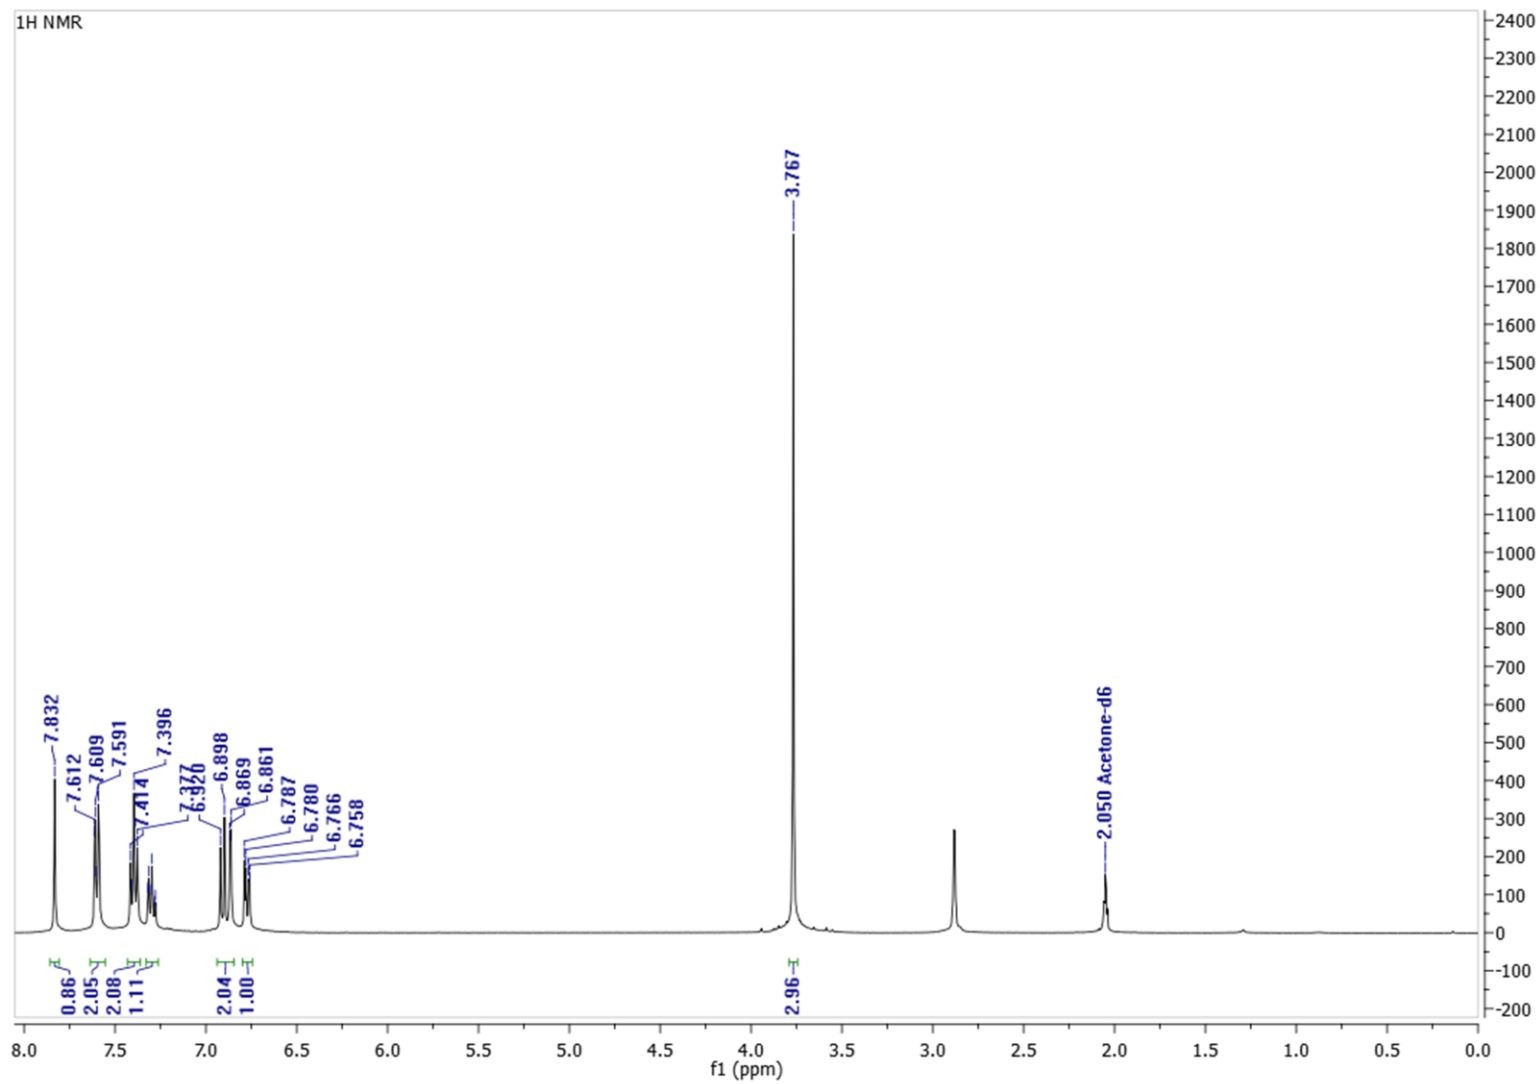

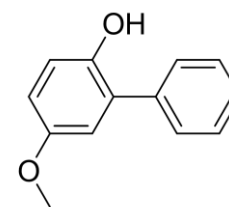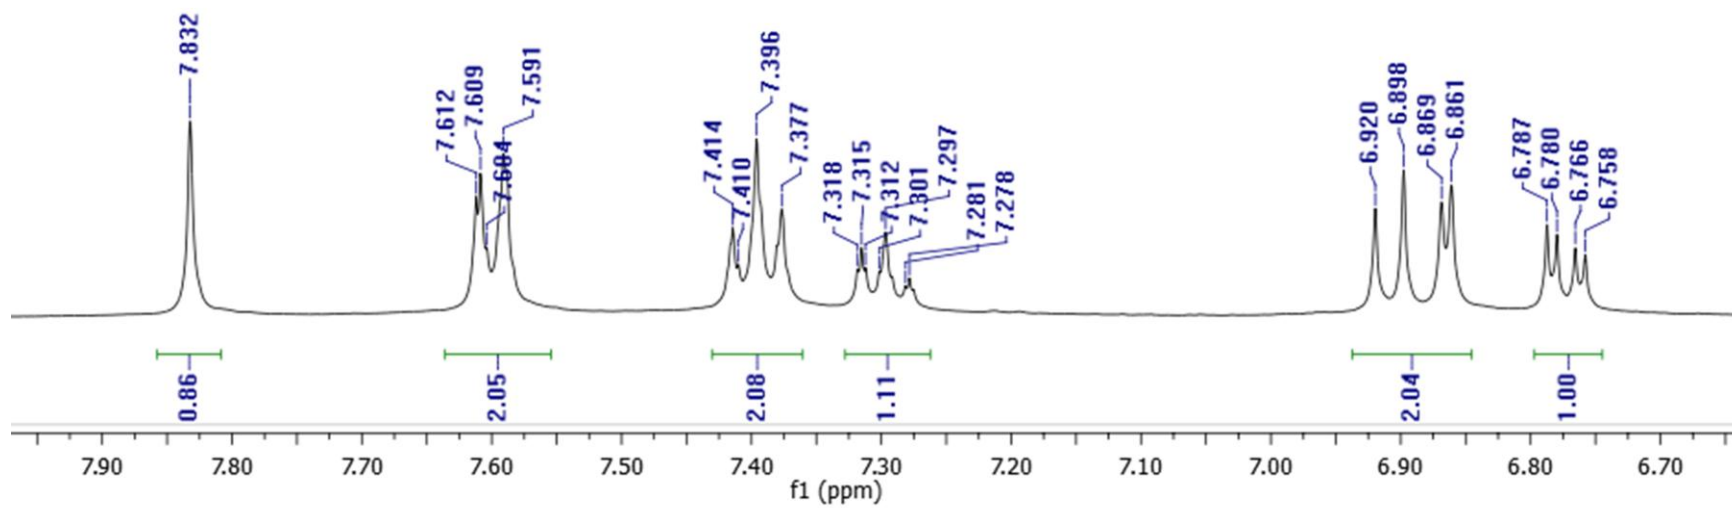



### 5-Methoxy-[1,1'-biphenyl]-2-ol (2) after photolysis in CH<sub>3</sub>CN:D<sub>2</sub>O (3:1)

<sup>1</sup>H NMR (400 MHz, (CD<sub>3</sub>)<sub>2</sub>CO)

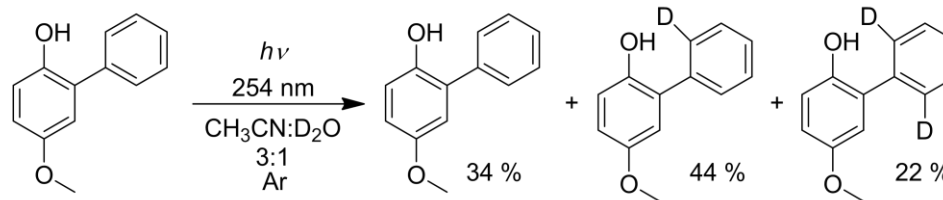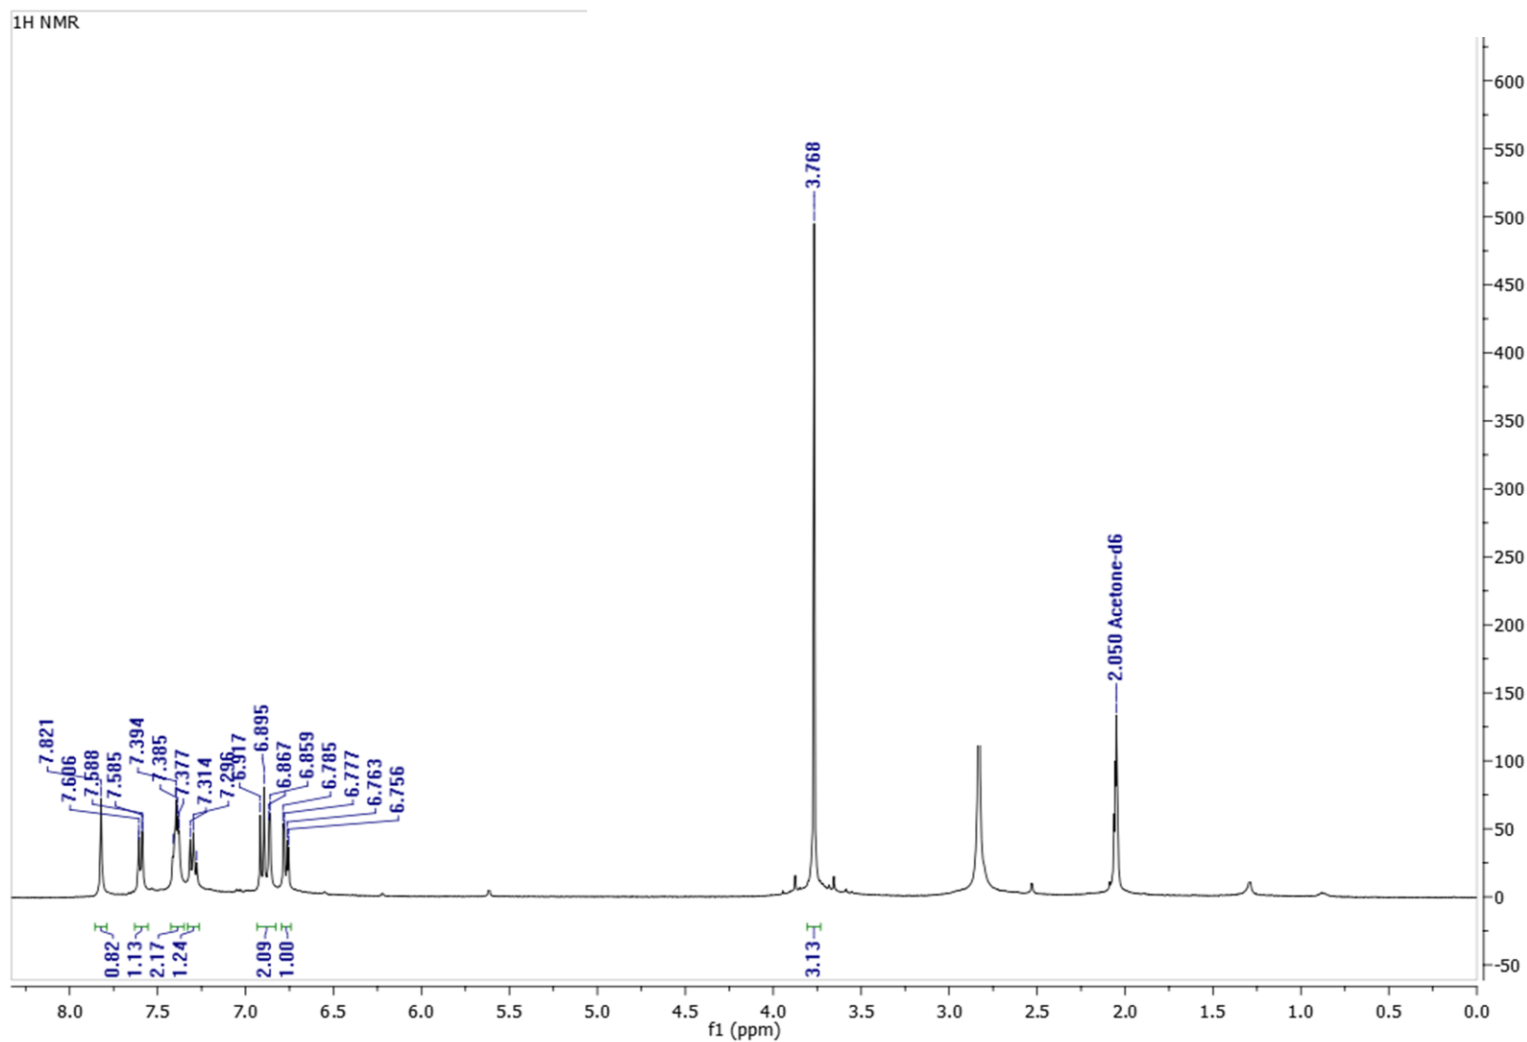

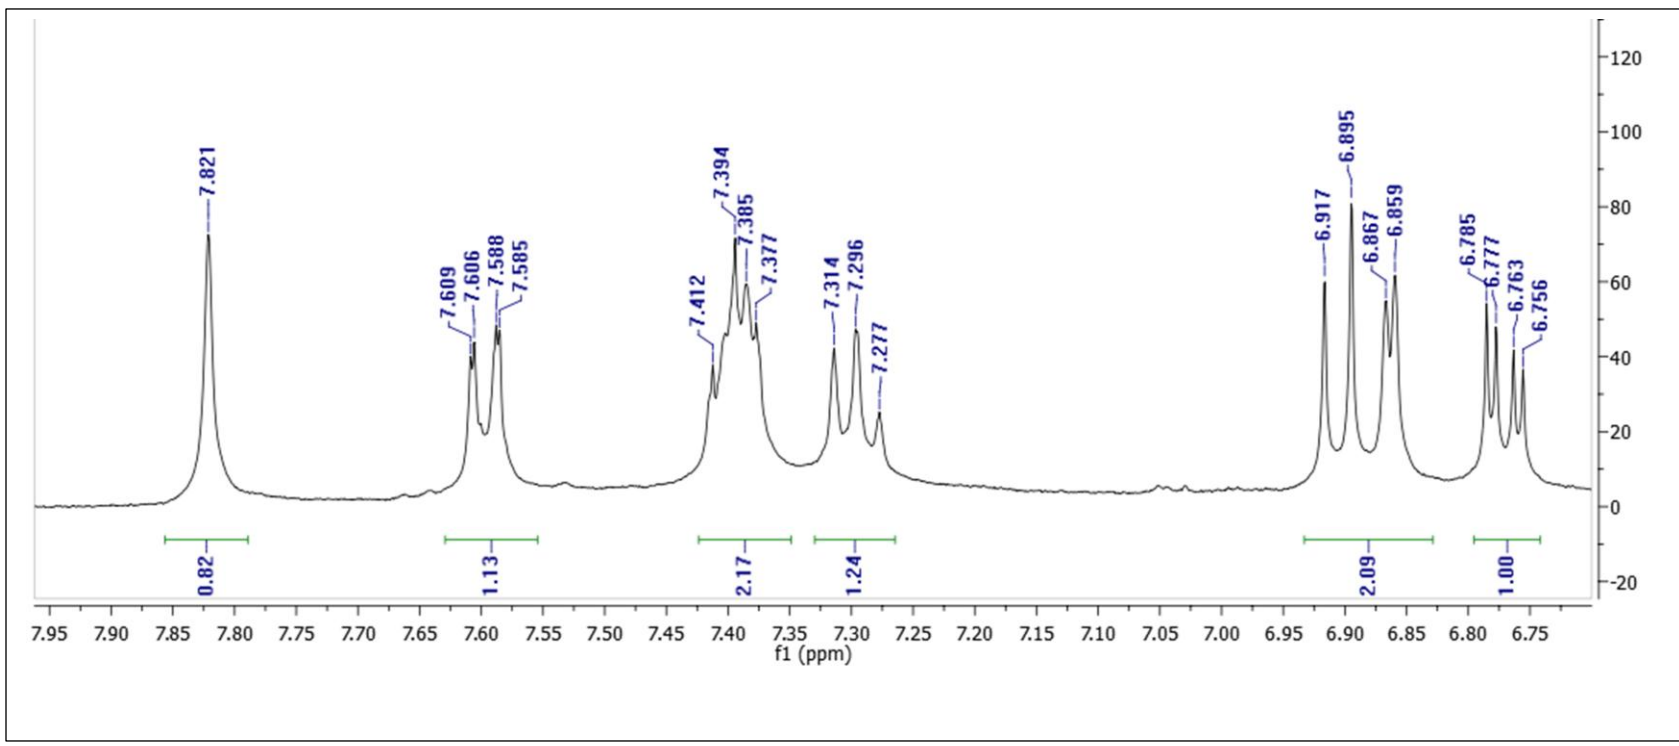

5-(*tert*-Butyl)-[1,1'-biphenyl]-2-ol (3)

$^1\text{H}$  NMR (400 MHz,  $(\text{CD}_3)_2\text{CO}$ )

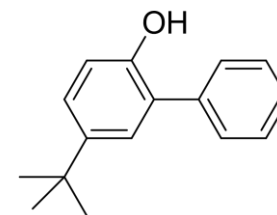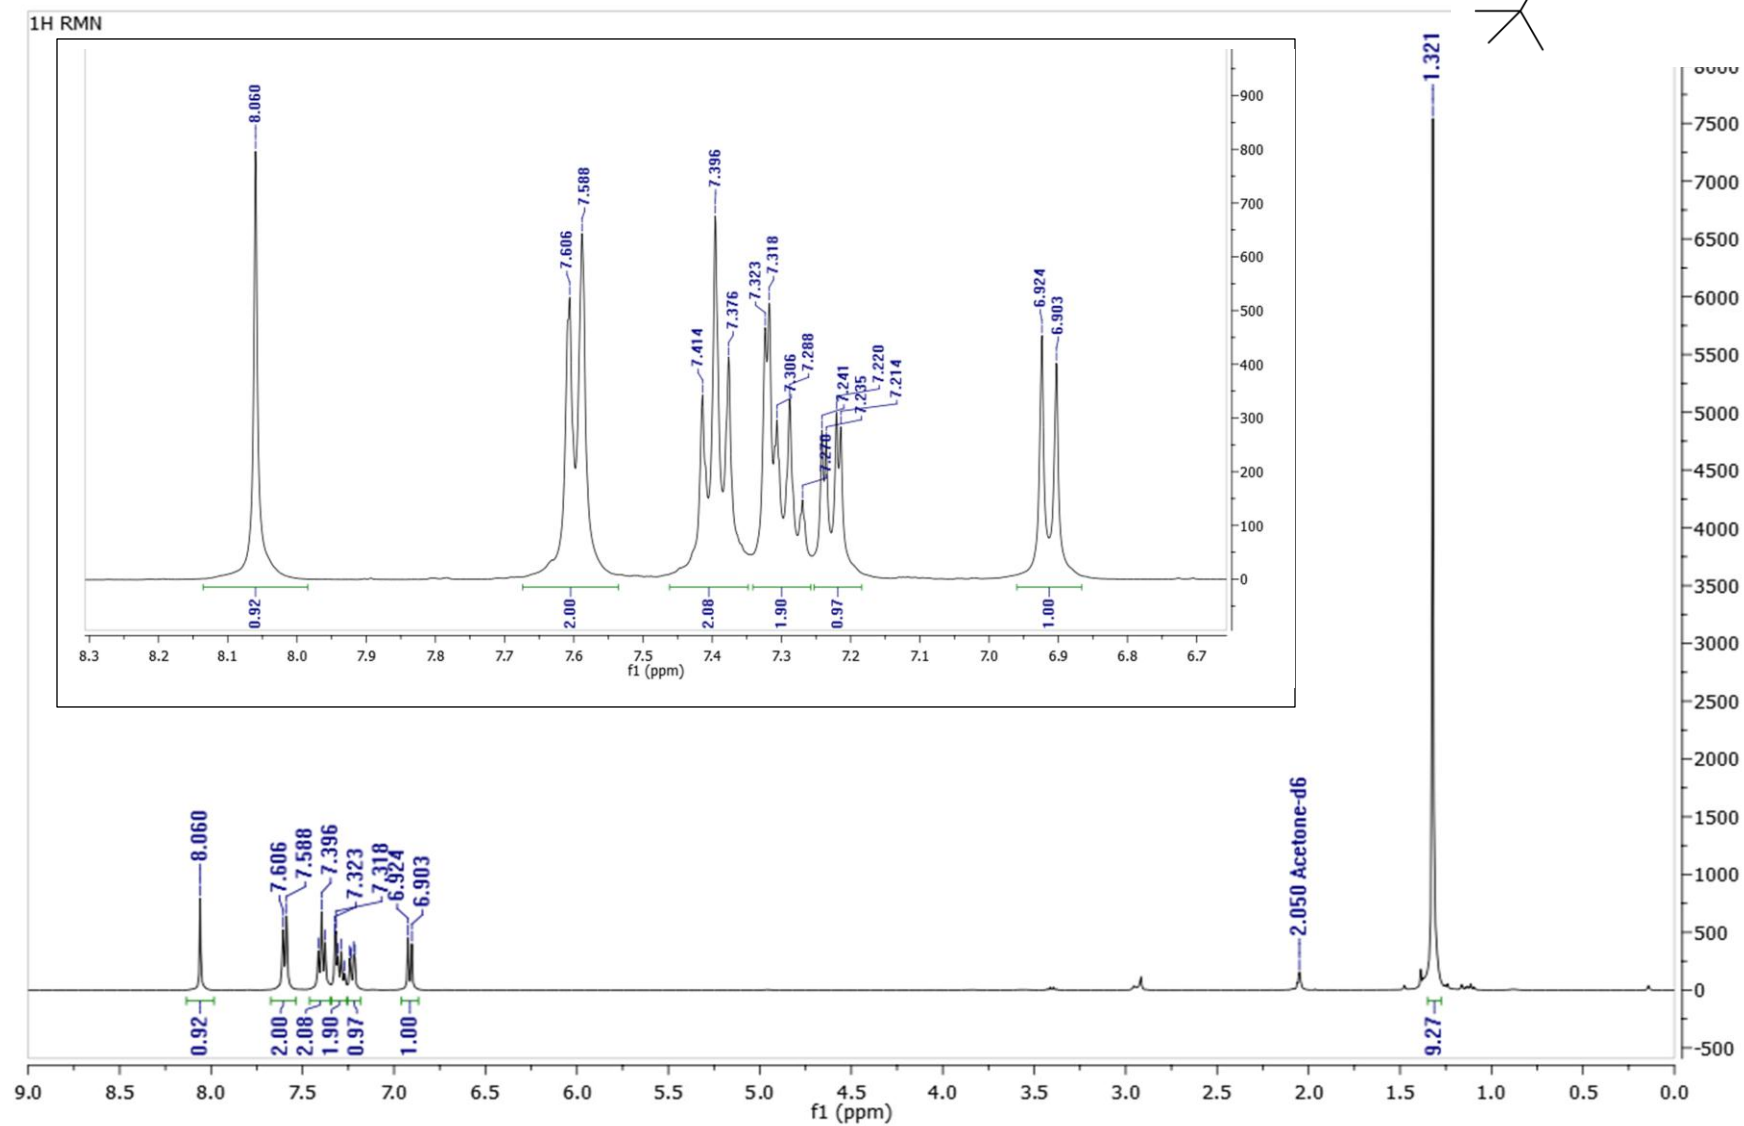

COSY ((CD<sub>3</sub>)<sub>2</sub>CO)

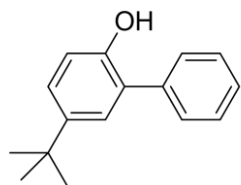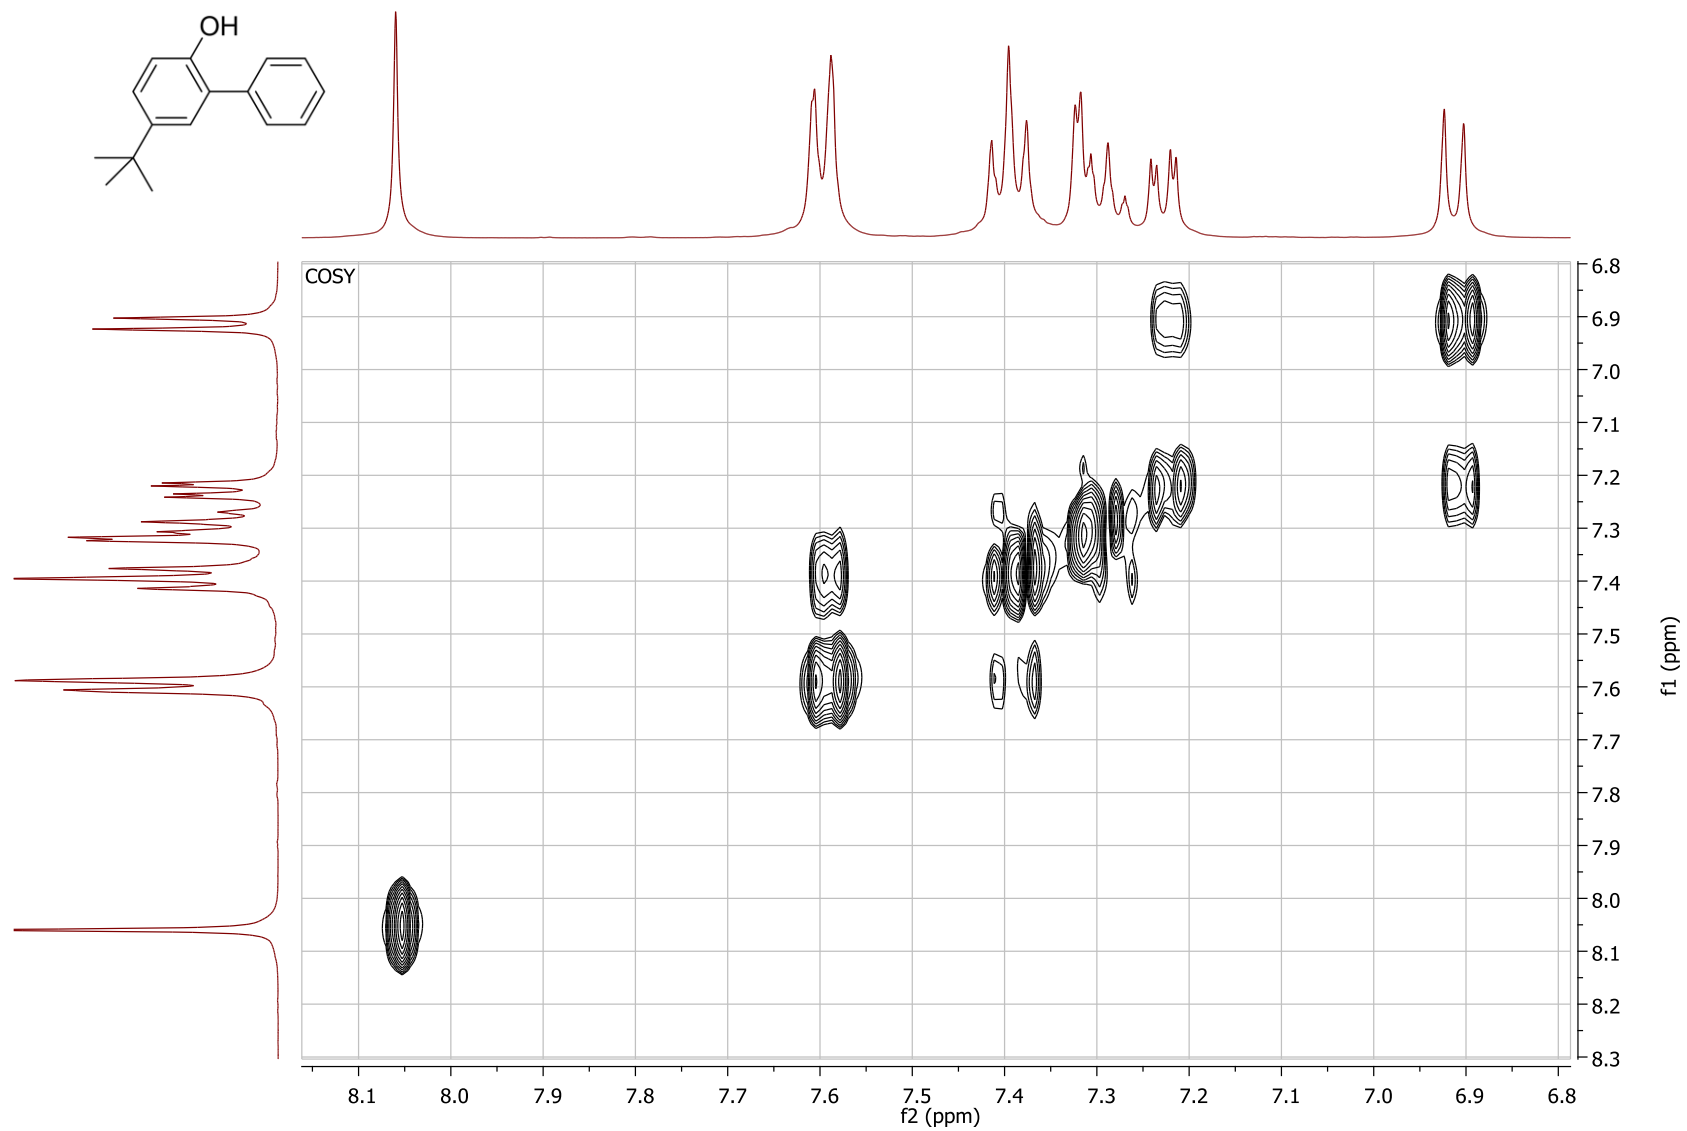

5-(*tert*-Butyl)-[1,1'-biphenyl]-2-ol (3) after photolysis in CH<sub>3</sub>CN:D<sub>2</sub>O (3:1)

<sup>1</sup>H NMR (400 MHz, (CD<sub>3</sub>)<sub>2</sub>CO)

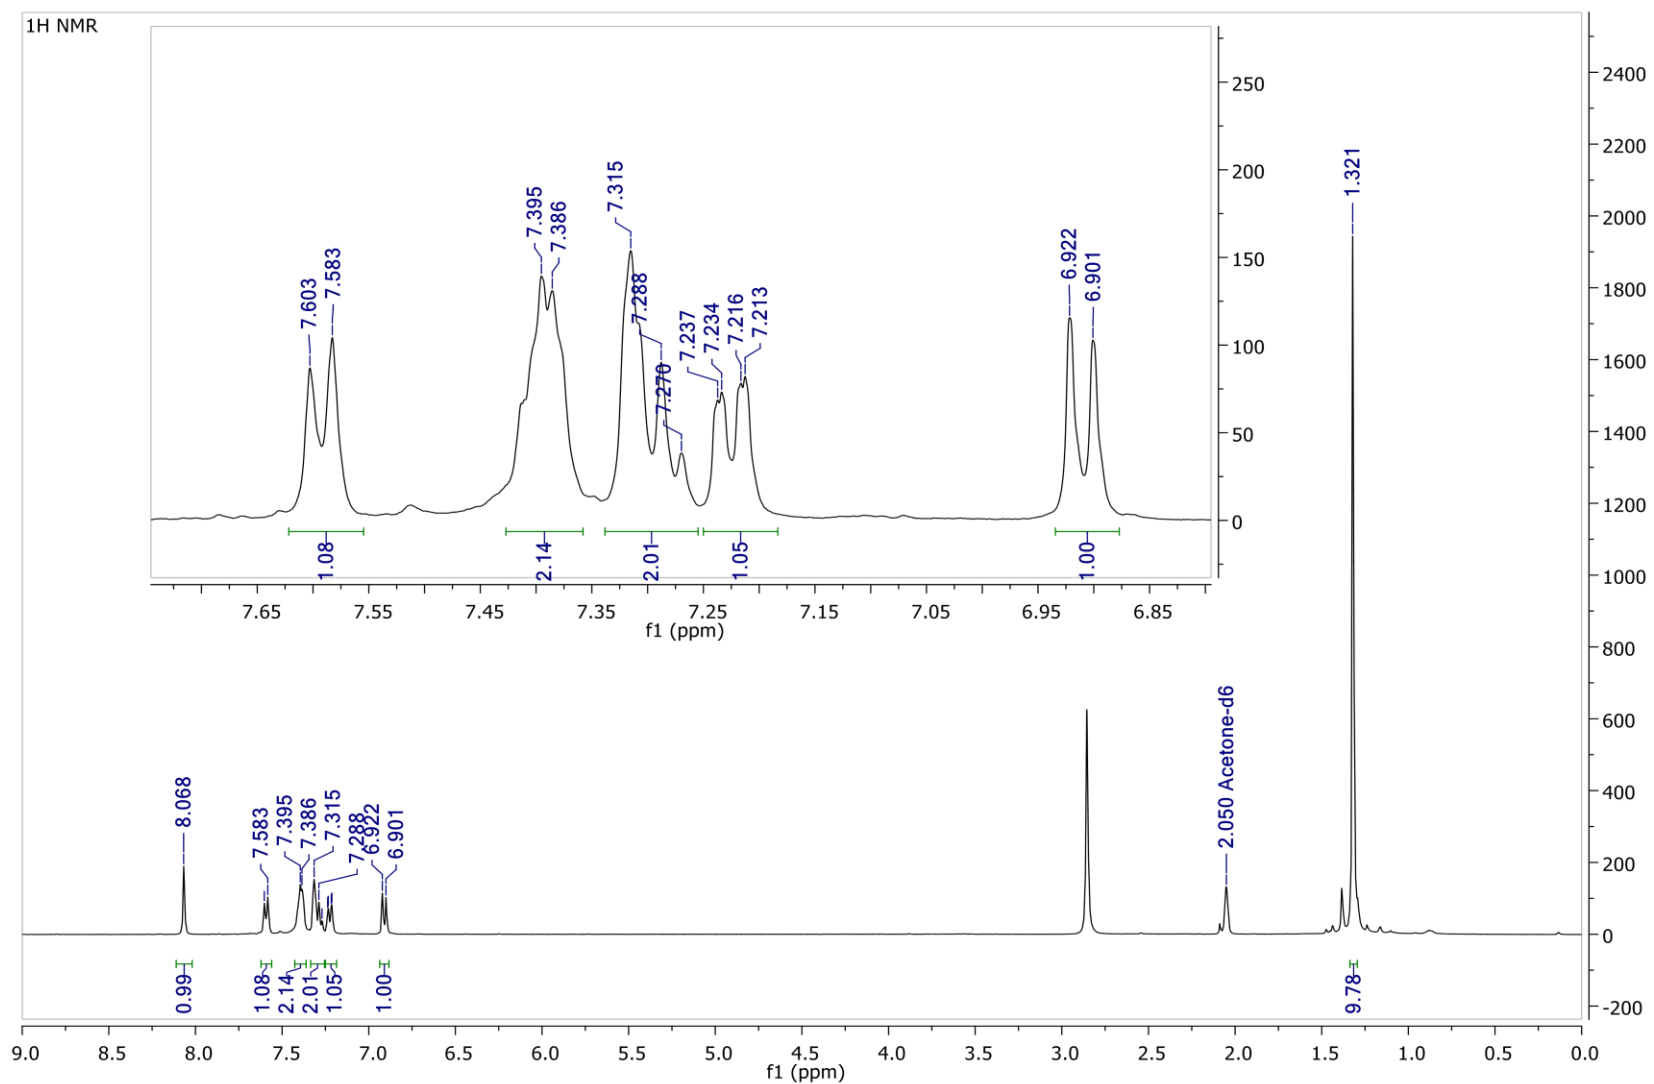

# 6-Hydroxy-[1,1'-biphenyl]-3-carboxylic acid

$^1\text{H}$  NMR (400 MHz,  $(\text{CD}_3)_2\text{CO}$ )

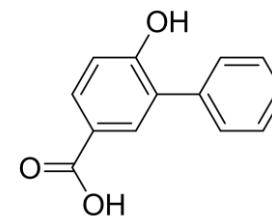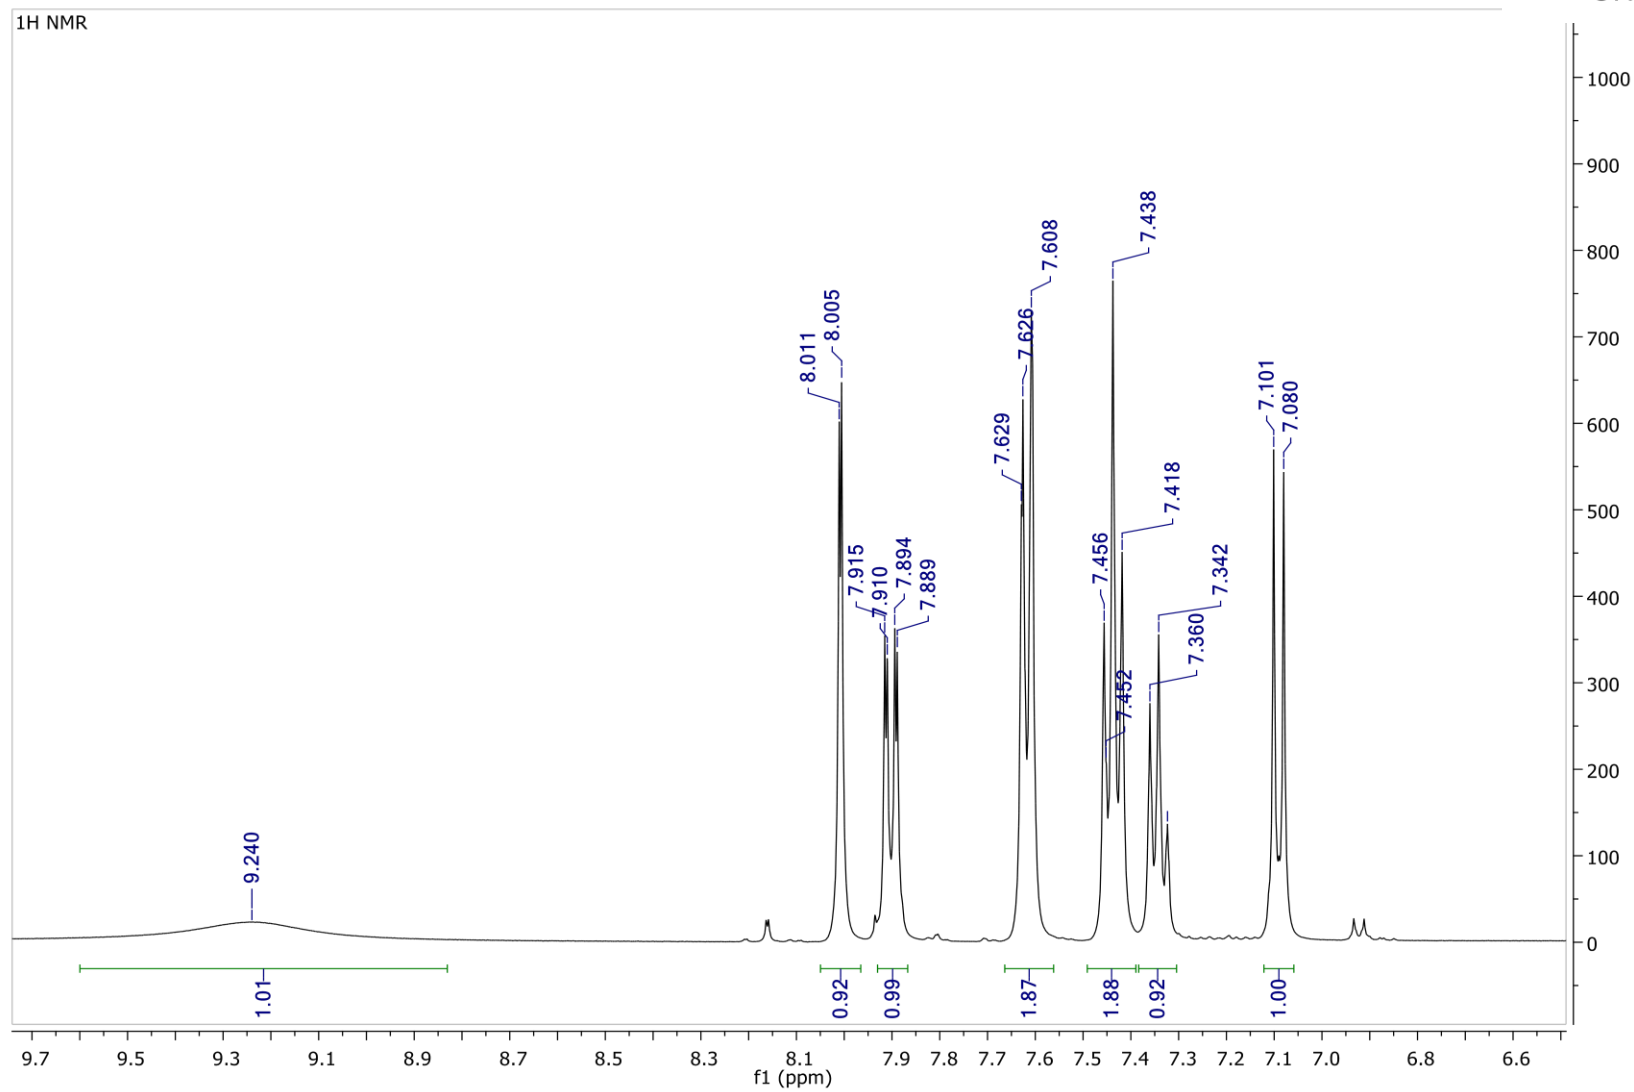

# 6-Hydroxy-[1,1'-biphenyl]-3-carboxylic acid

$^1\text{H}$  NMR (400 MHz,  $(\text{CD}_3)_2\text{SO}$ )

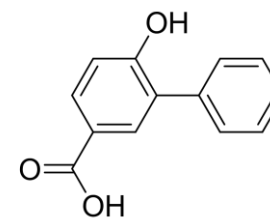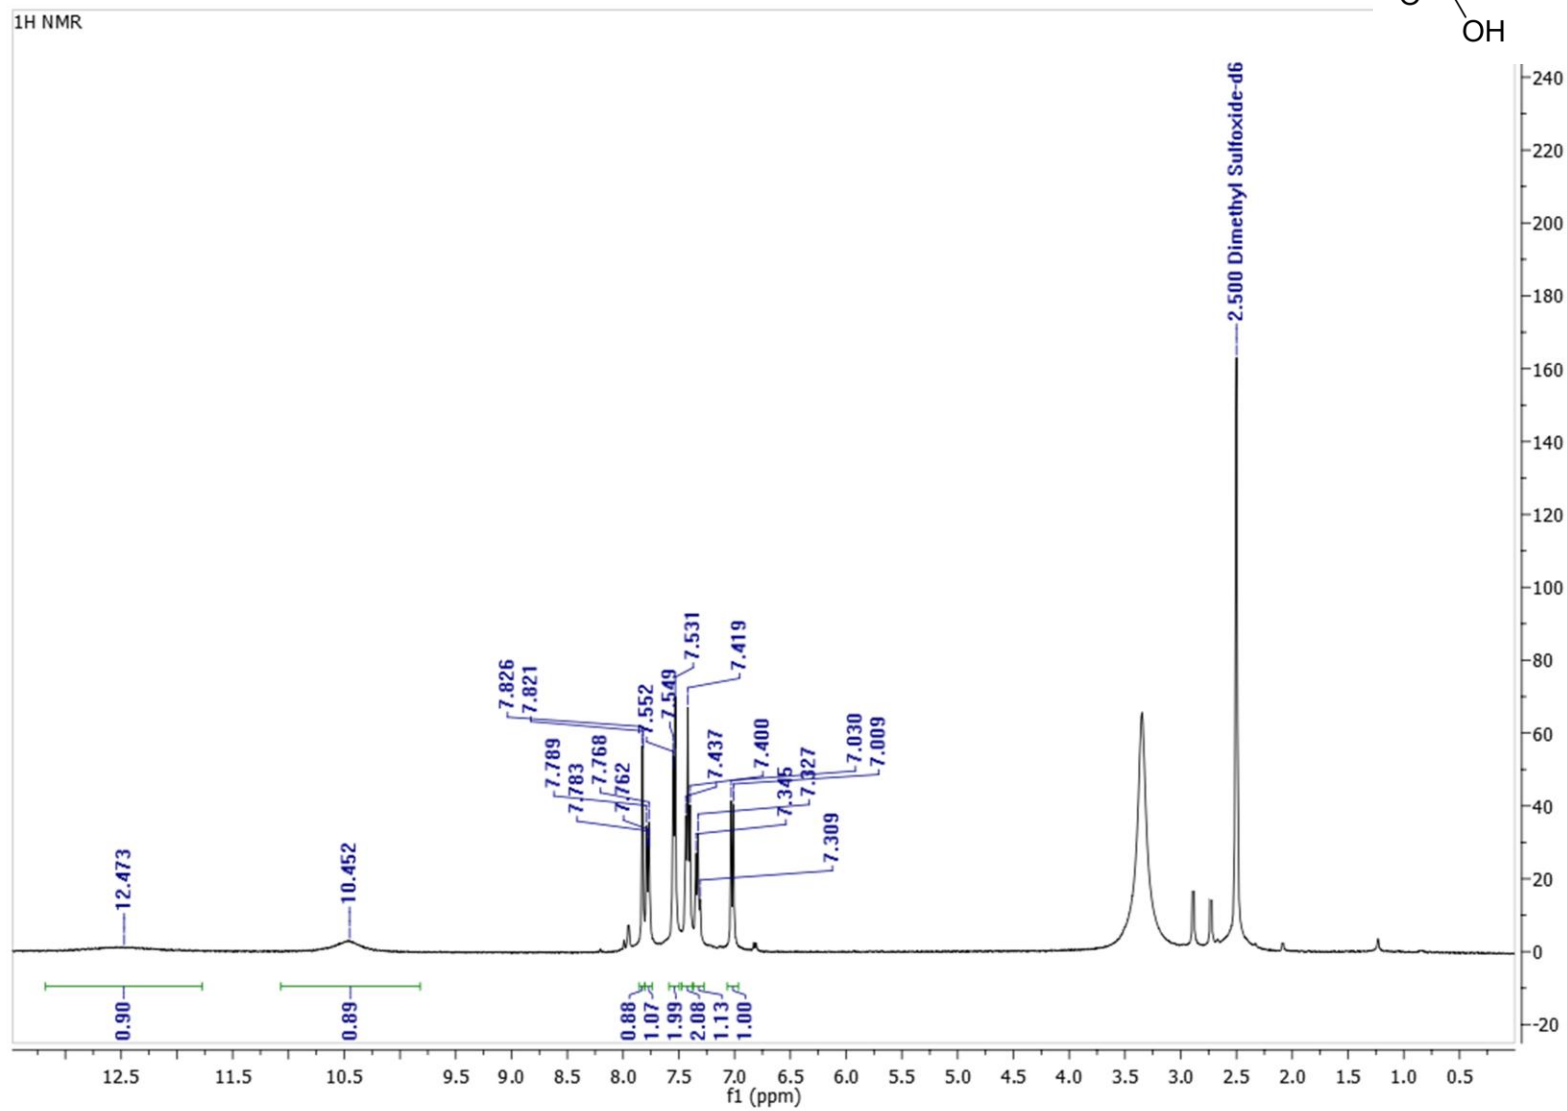

**6-Hydroxy-[1,1'-biphenyl]-3-carboxylic acid after photolysis in CH<sub>3</sub>CN:D<sub>2</sub>O (3:1)**

<sup>1</sup>H NMR (400 MHz, (CD<sub>3</sub>)<sub>2</sub>CO)

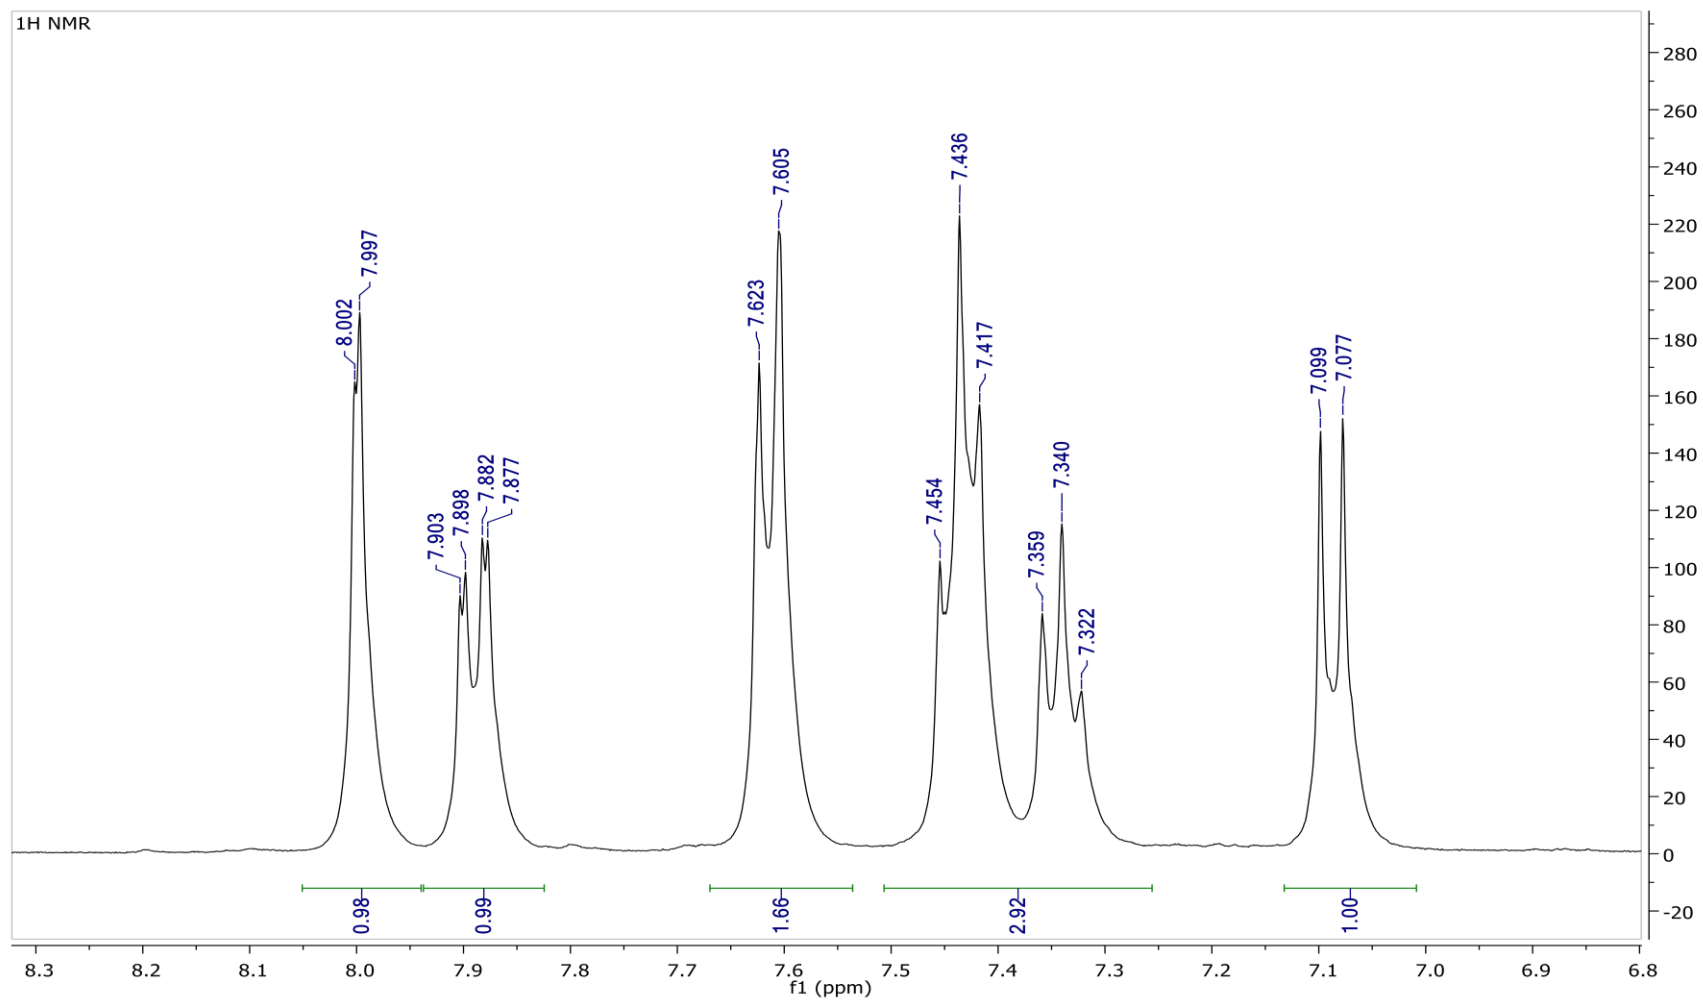



# Methyl 6-hydroxy-[1,1'-biphenyl]-3-carboxylate (4)

$^1\text{H}$  NMR (400 MHz,  $(\text{CD}_3)_2\text{CO}$ )

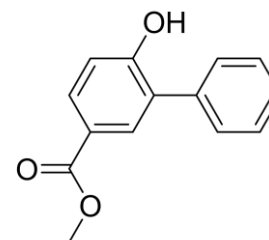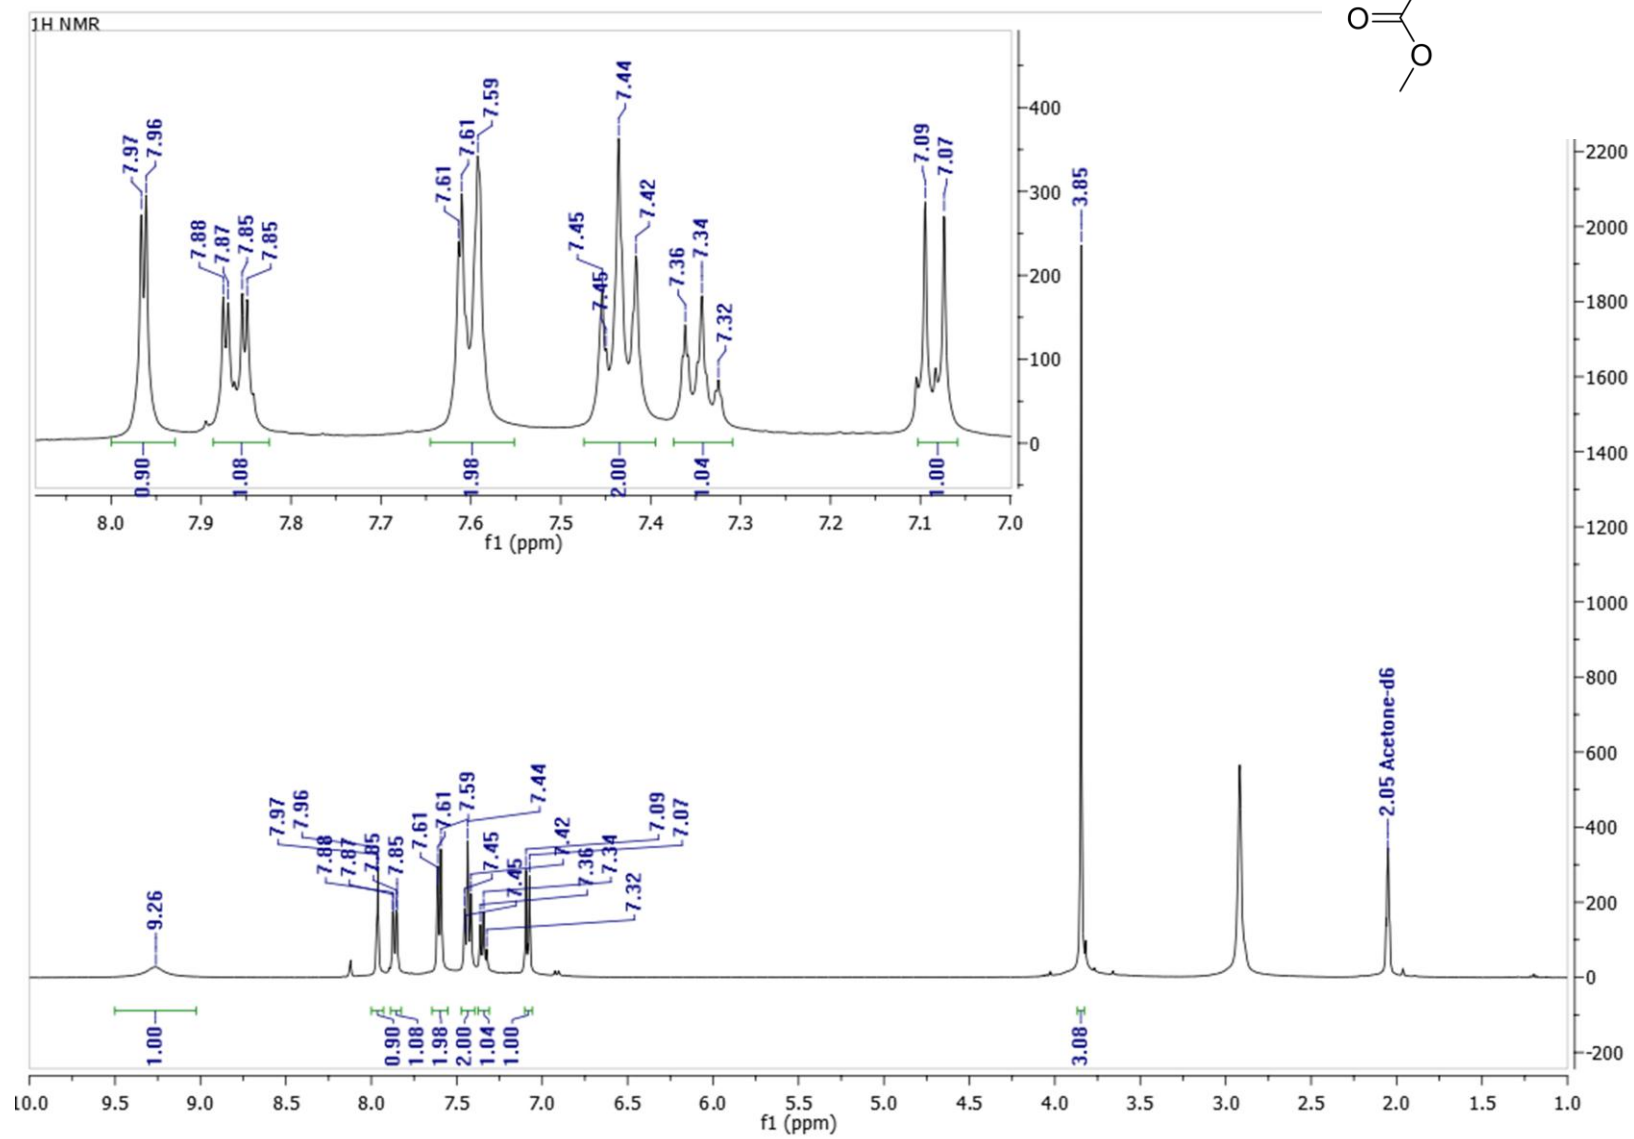

Methyl 6-hydroxy-[1,1'-biphenyl]-3-carboxylate (4)

$^{13}\text{C}$  NMR (100 MHz,  $(\text{CD}_3)_2\text{CO}$ )

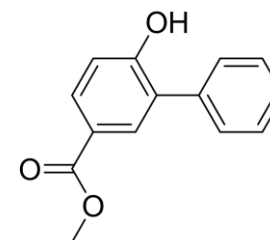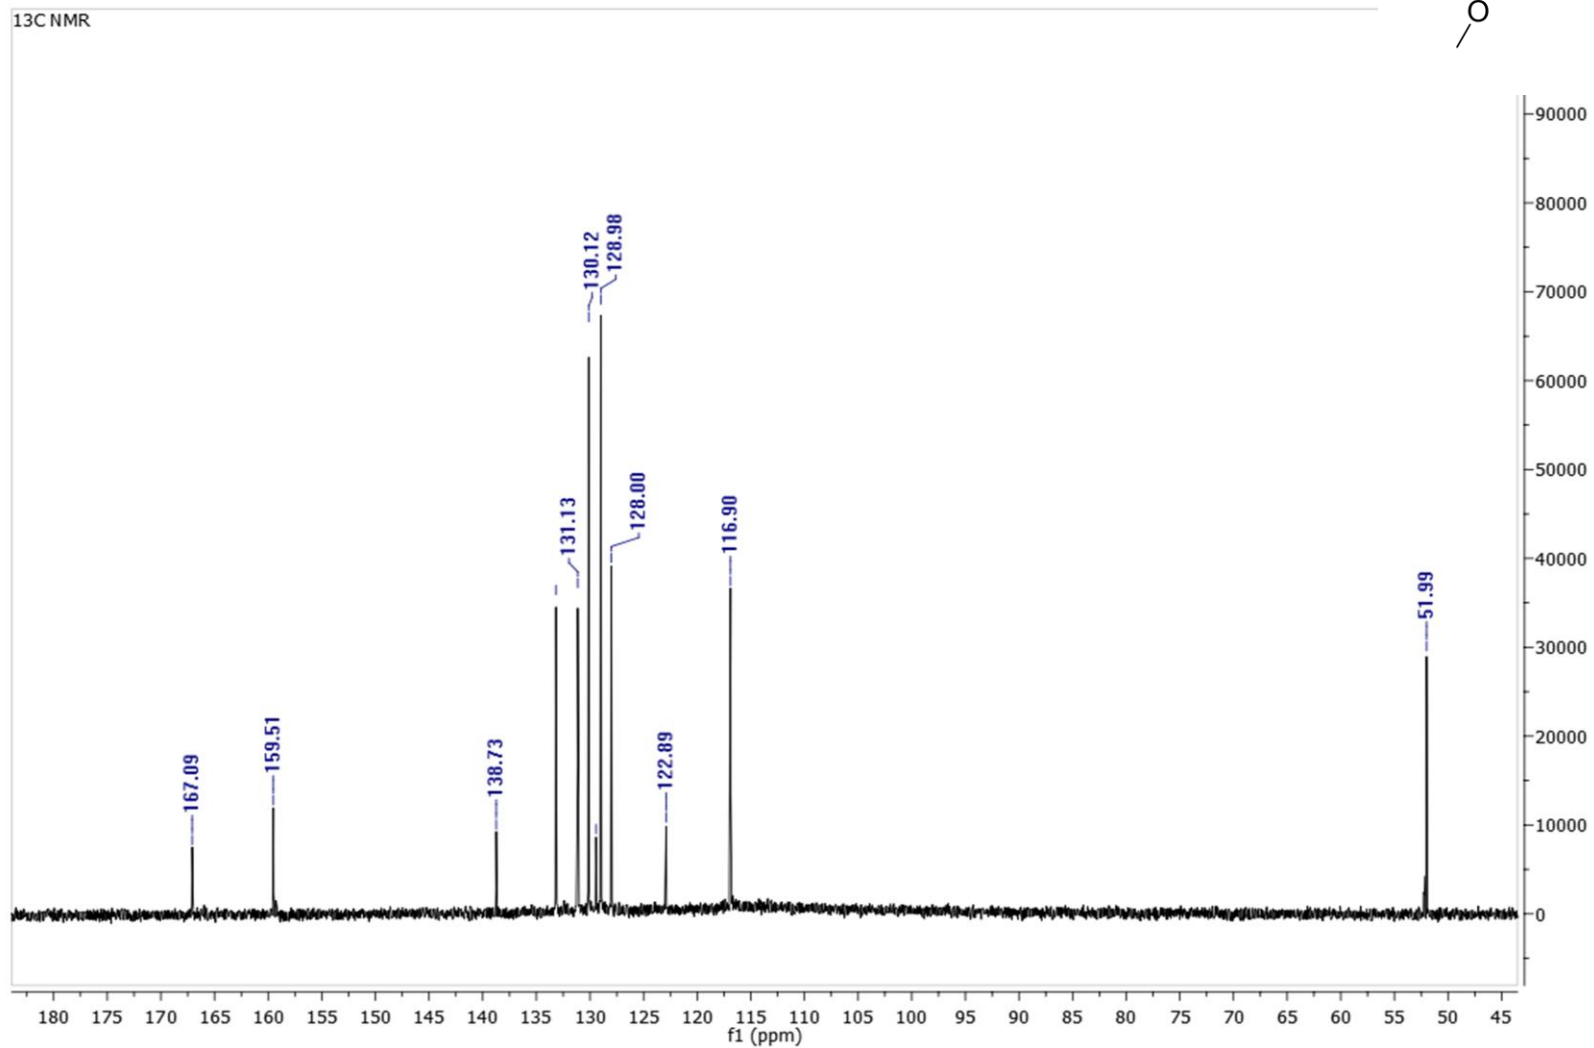

Methyl 6-hydroxy-[1,1'-biphenyl]-3-carboxylate (4)

COSY

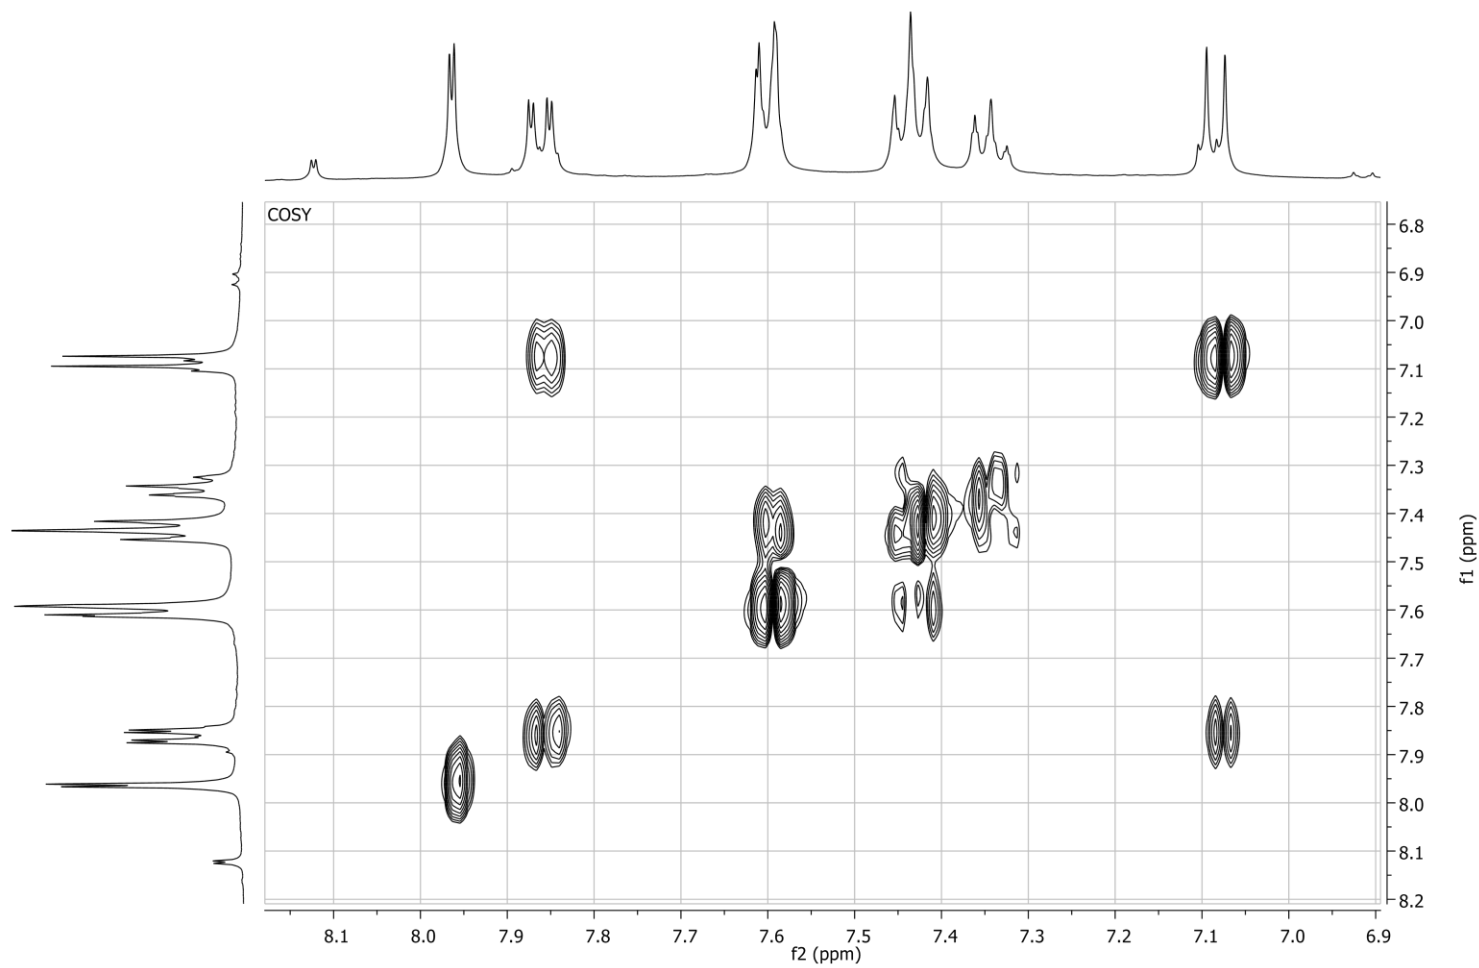

Methyl 6-hydroxy-[1,1'-biphenyl]-3-carboxylate (4)

HMBC

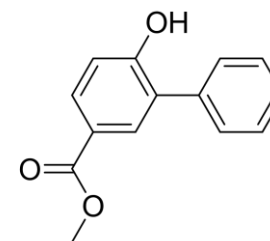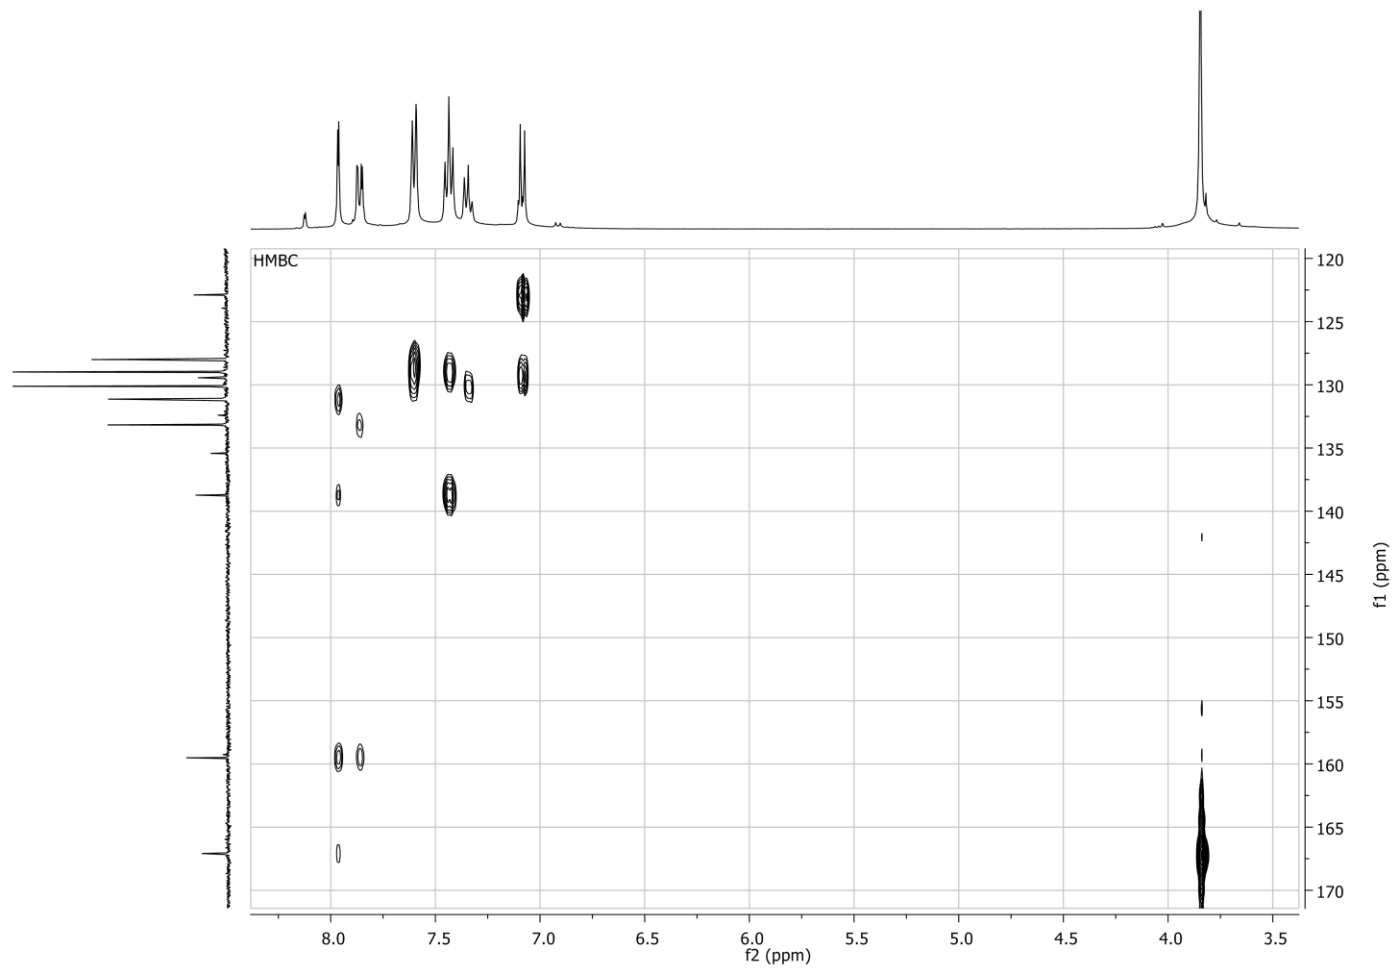

Methyl 6-hydroxy-[1,1'-biphenyl]-3-carboxylate (4)

HSQC

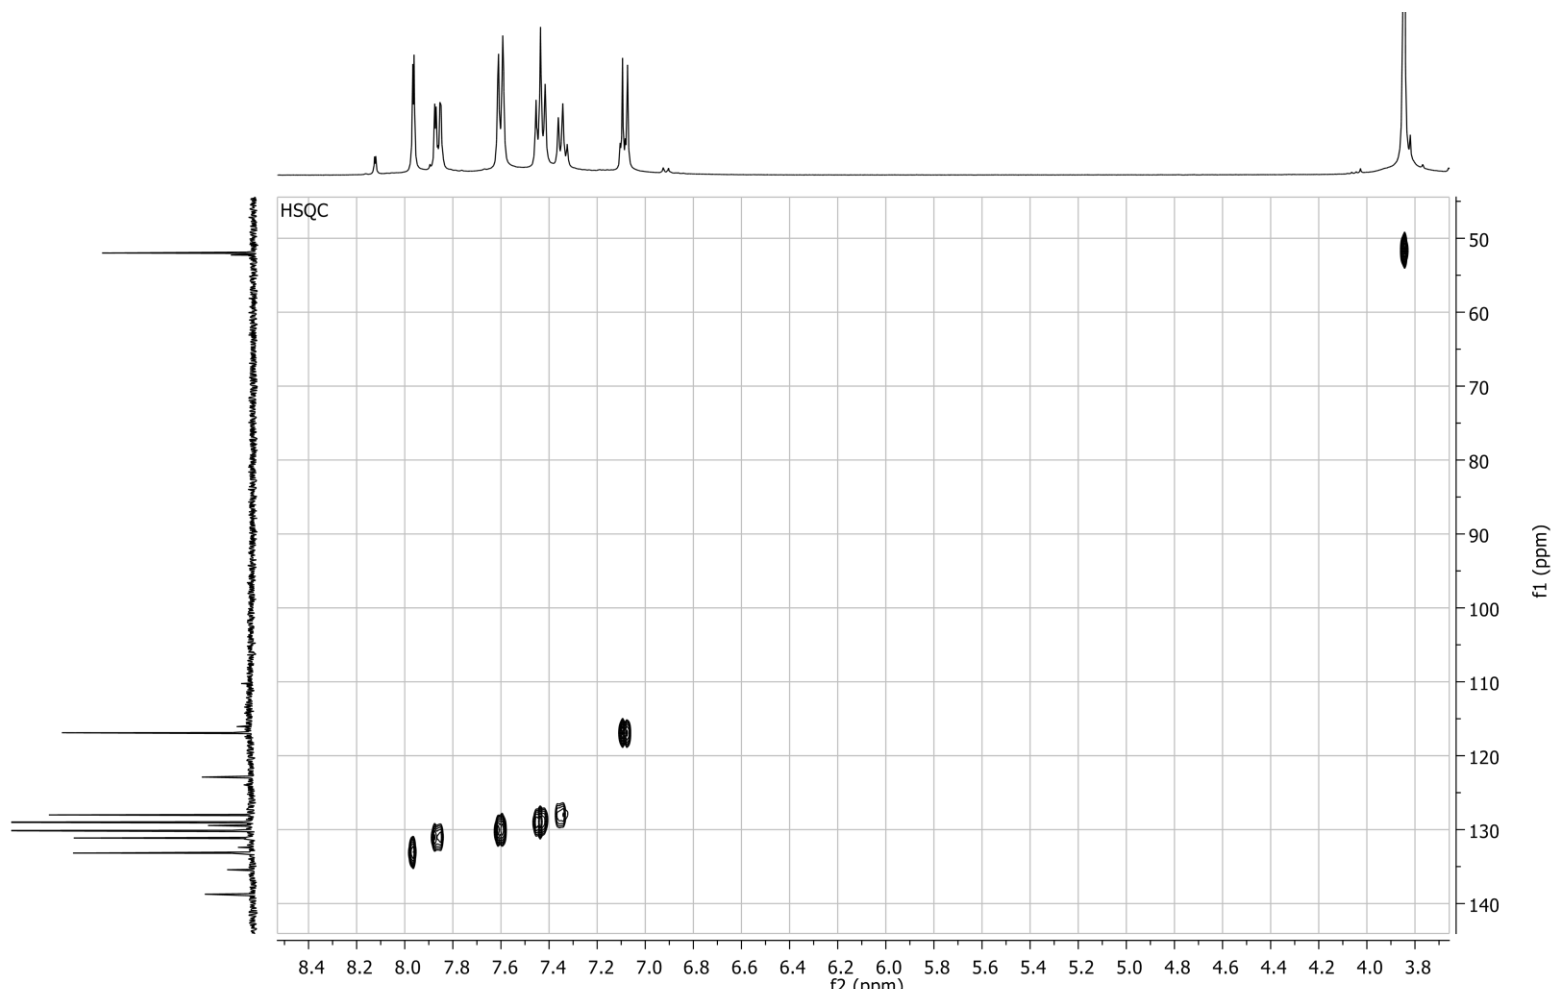

# 6-Hydroxy-[1,1'-biphenyl]-3-carbonitrile (5)

$^1\text{H}$  NMR (400 MHz,  $(\text{CD}_3)_2\text{CO}$ )

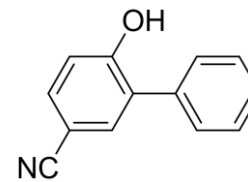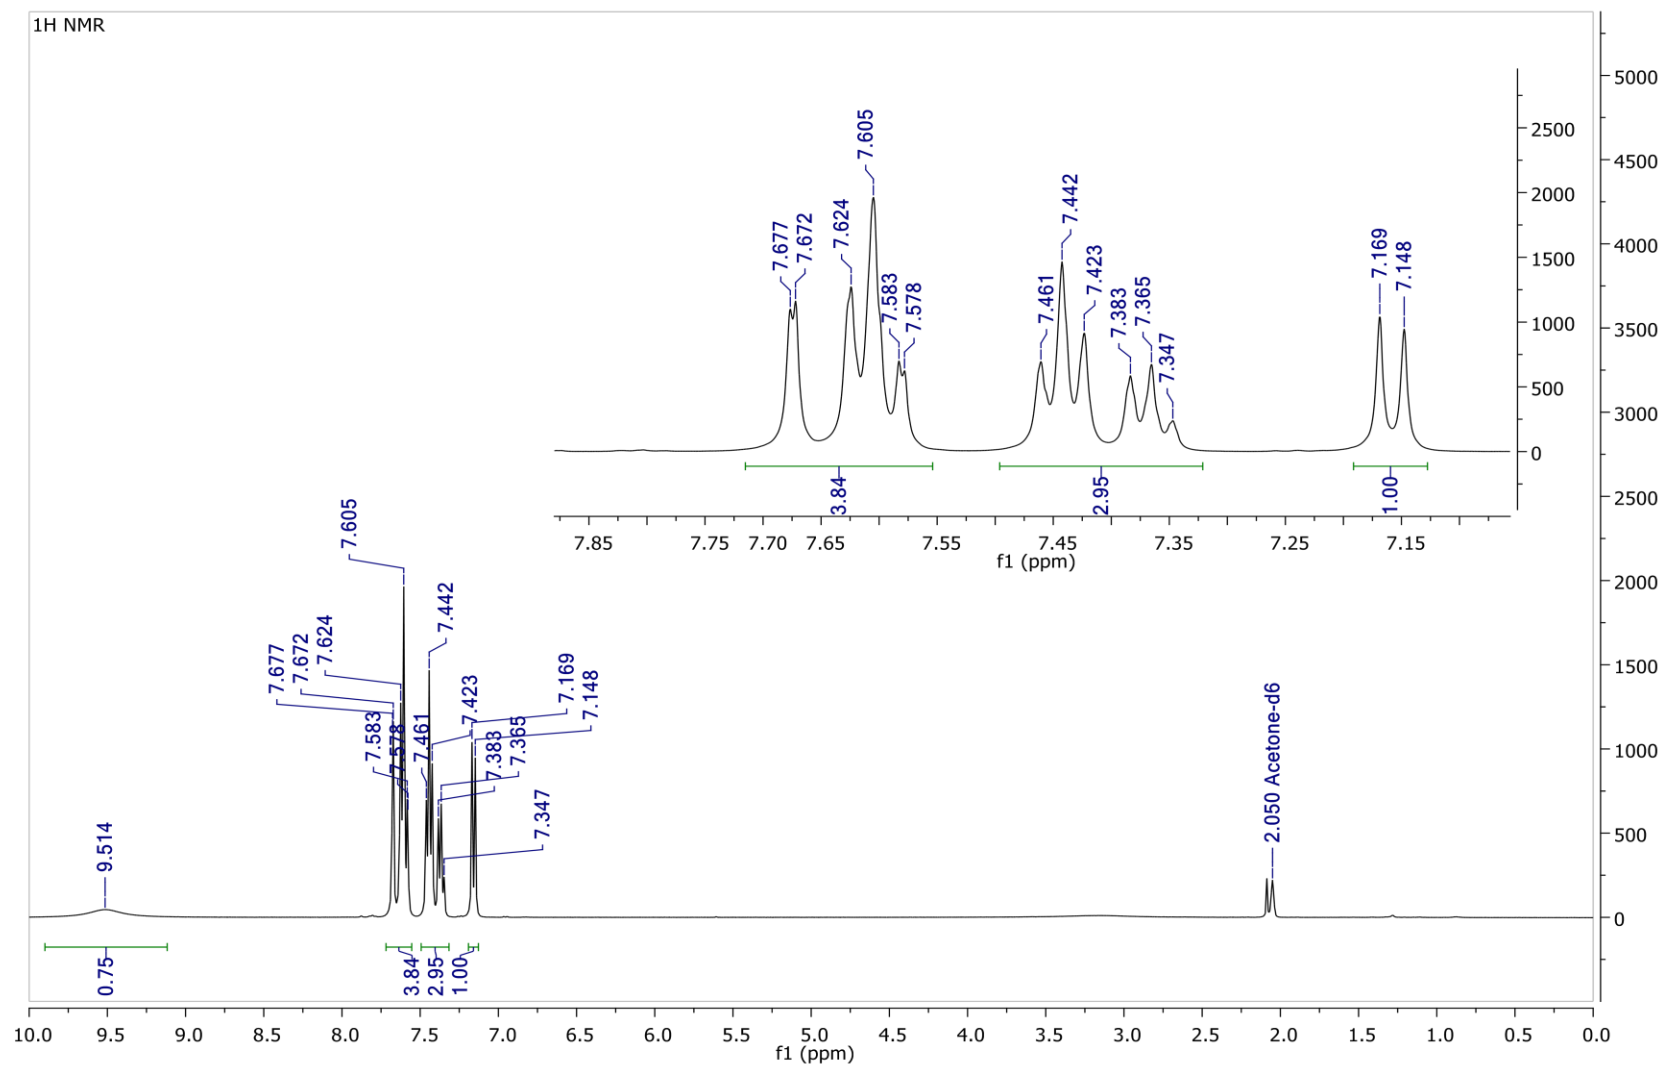

### 6-Hydroxy-[1,1'-biphenyl]-3-carbonitrile (**5**) after photolysis in CH<sub>3</sub>CN:D<sub>2</sub>O (3:1)

<sup>1</sup>H NMR (400 MHz, (CD<sub>3</sub>)<sub>2</sub>CO)

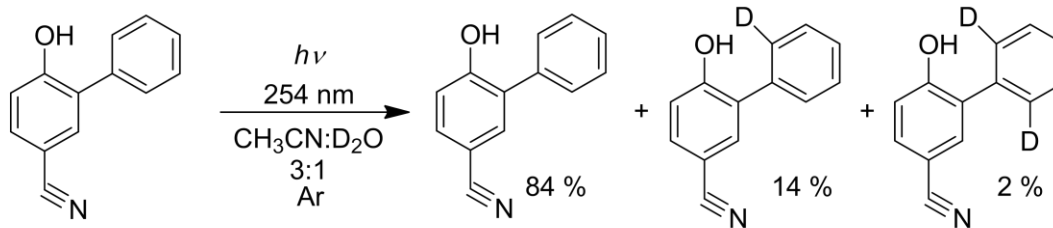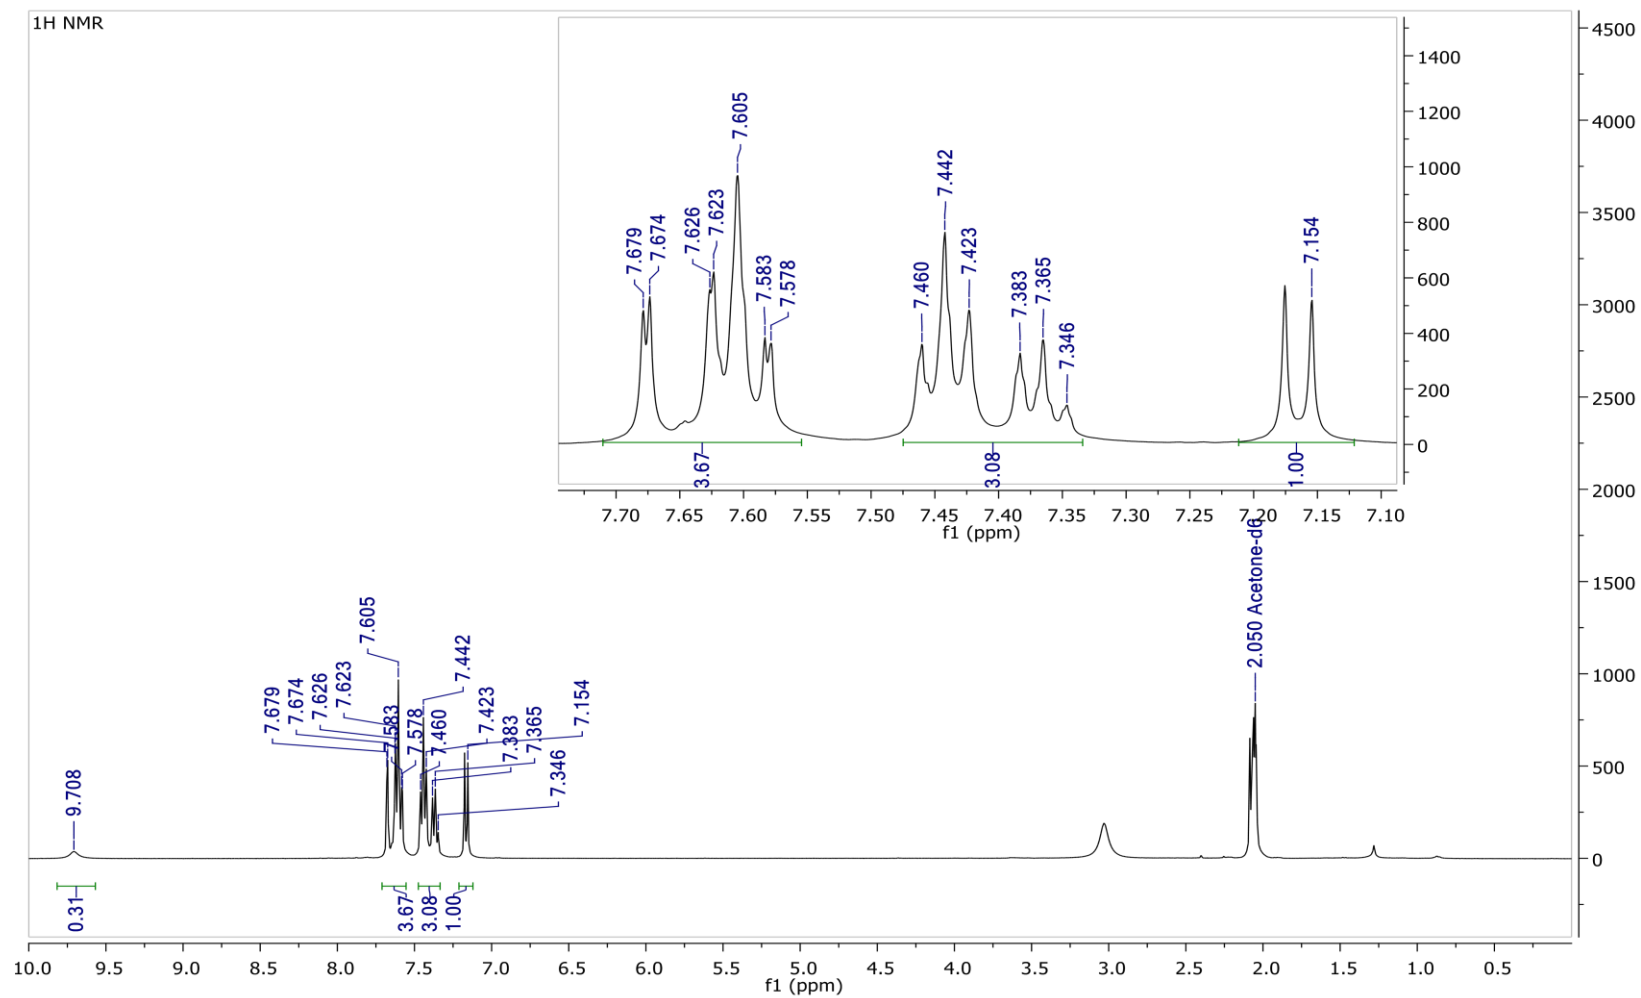

**3,5-di-*tert*-Butyl-[1,1'-biphenyl]-2-ol (6)**

$^1\text{H}$  NMR (400 MHz,  $(\text{CD}_3)_2\text{CO}$ )

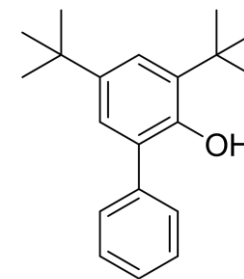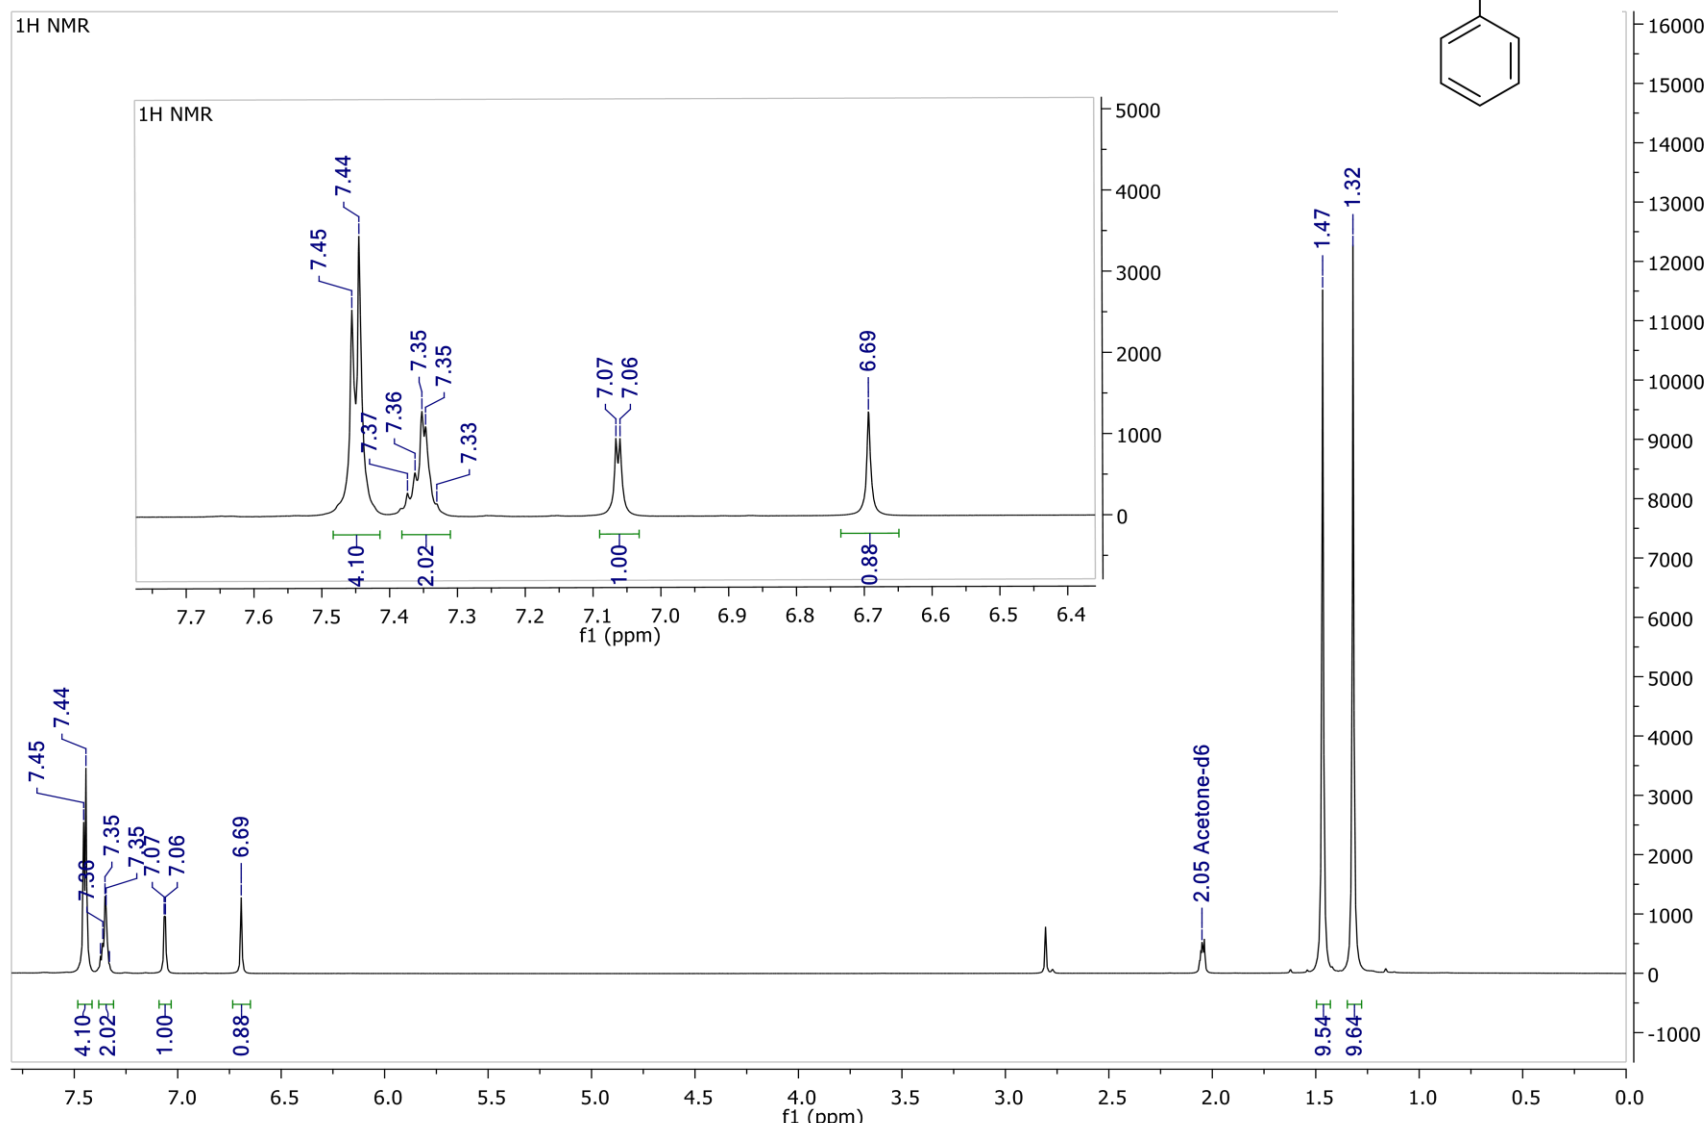



**3,5-di-*tert*-Butyl-[1,1'-biphenyl]-2-ol (6)**

$^{13}\text{C}$  NMR (100 MHz,  $(\text{CD}_3)_2\text{CO}$ )

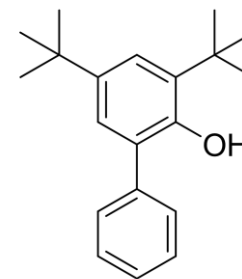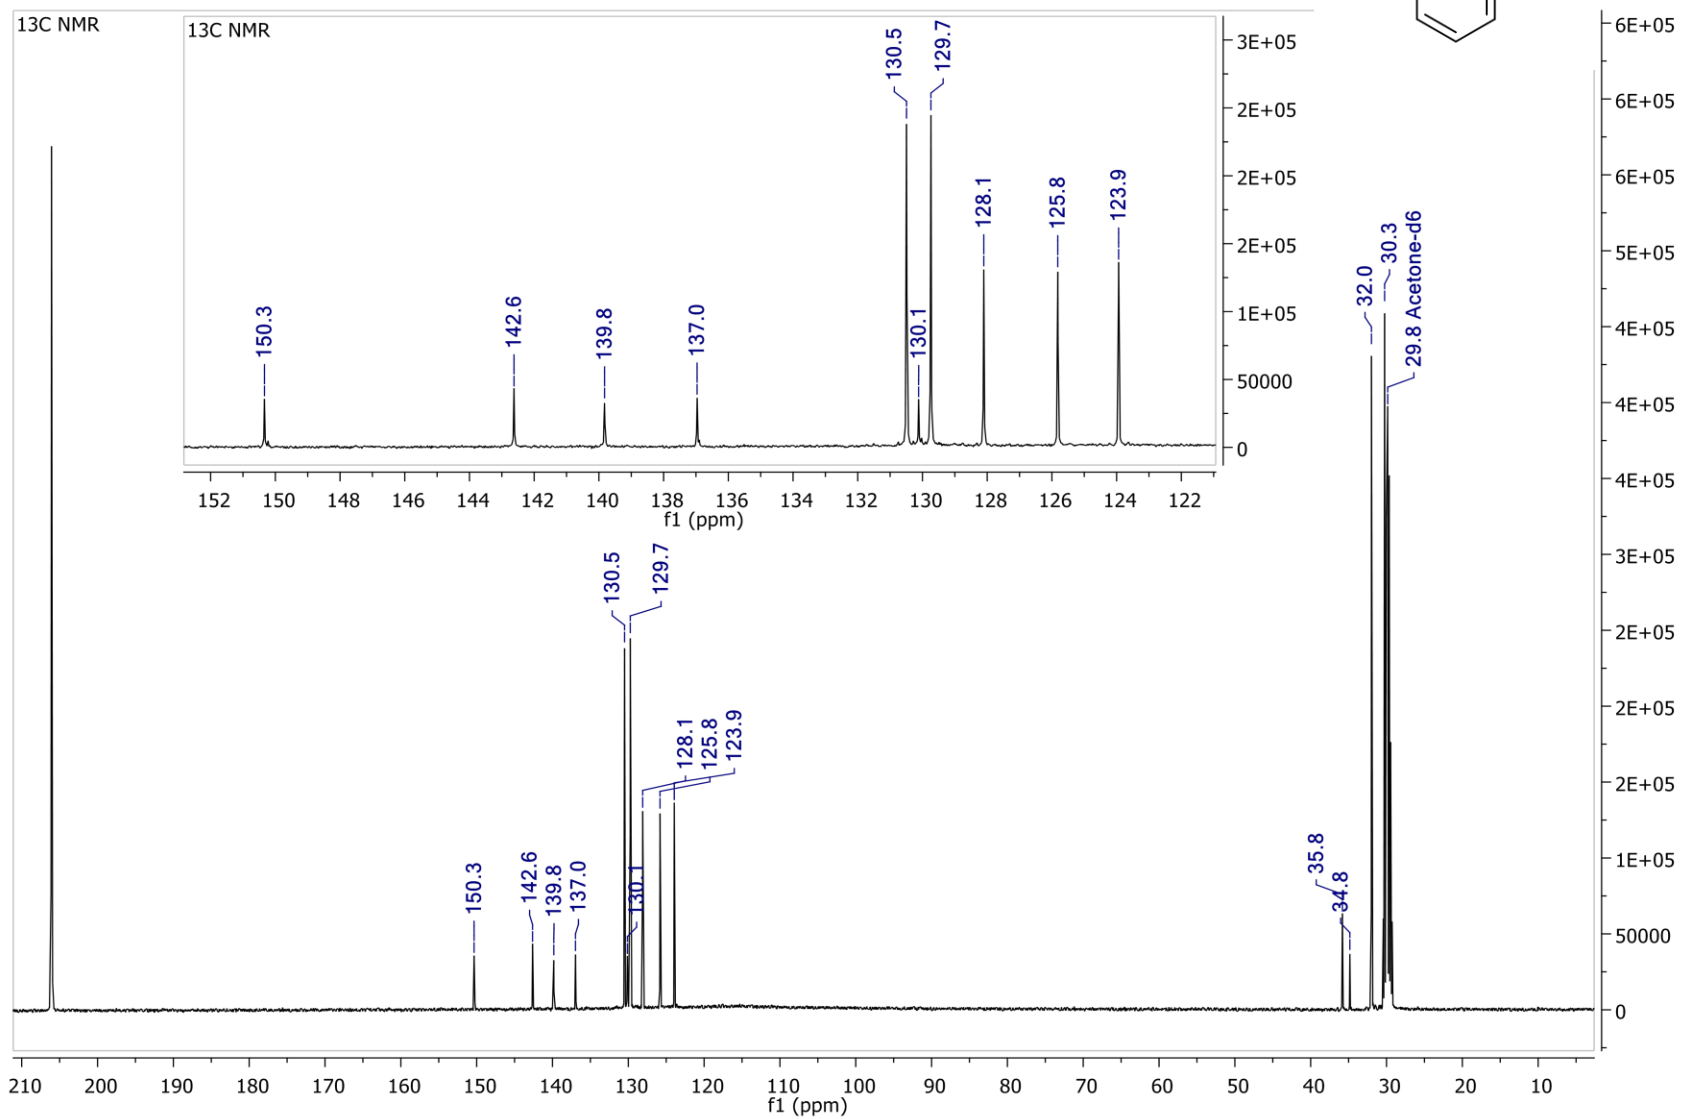

**3,5-di-*tert*-Butyl-[1,1'-biphenyl]-2-ol (6) after photolysis in CH<sub>3</sub>CN:D<sub>2</sub>O (3:1)**

<sup>1</sup>H NMR (400 MHz, (CD<sub>3</sub>)<sub>2</sub>CO)

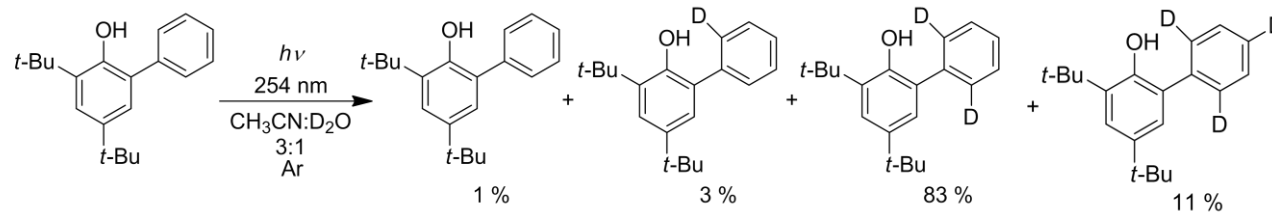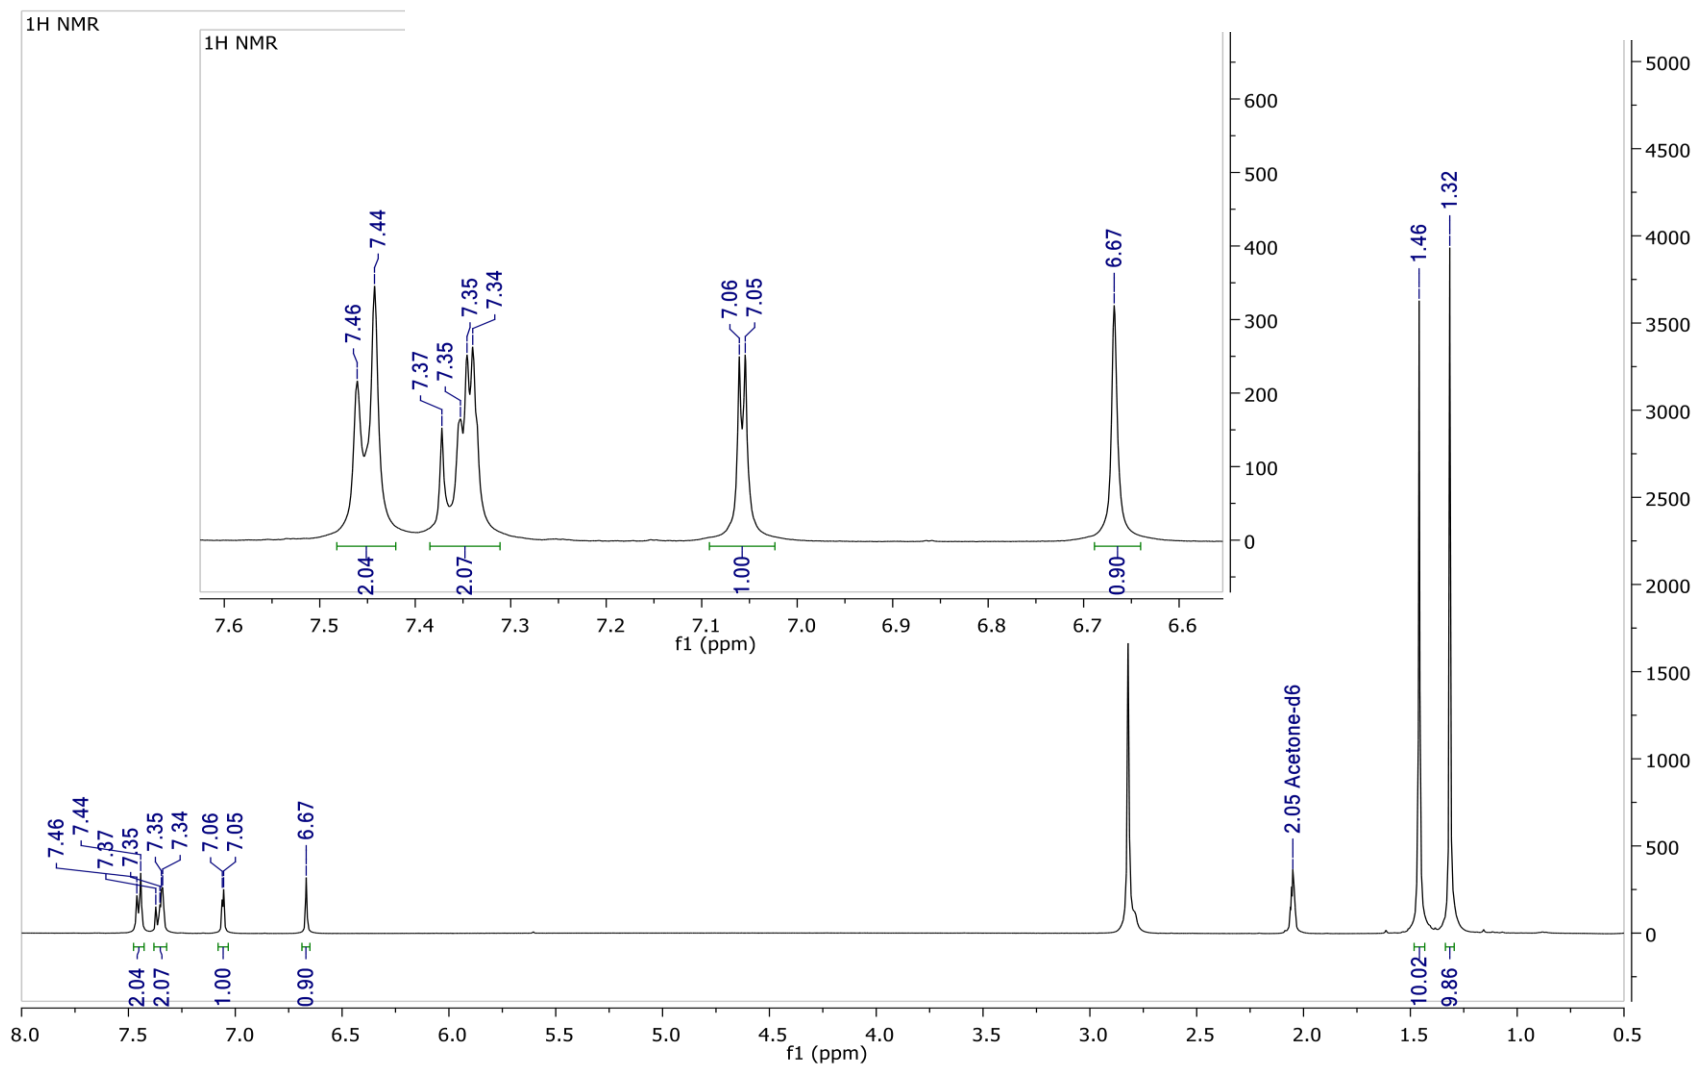

3,5-di-*tert*-Butyl-[1,1'-biphenyl]-2-ol (6) after photolysis in CH<sub>3</sub>CN:D<sub>2</sub>O (3:1)

<sup>13</sup>C NMR (100 MHz, (CD<sub>3</sub>)<sub>2</sub>CO)

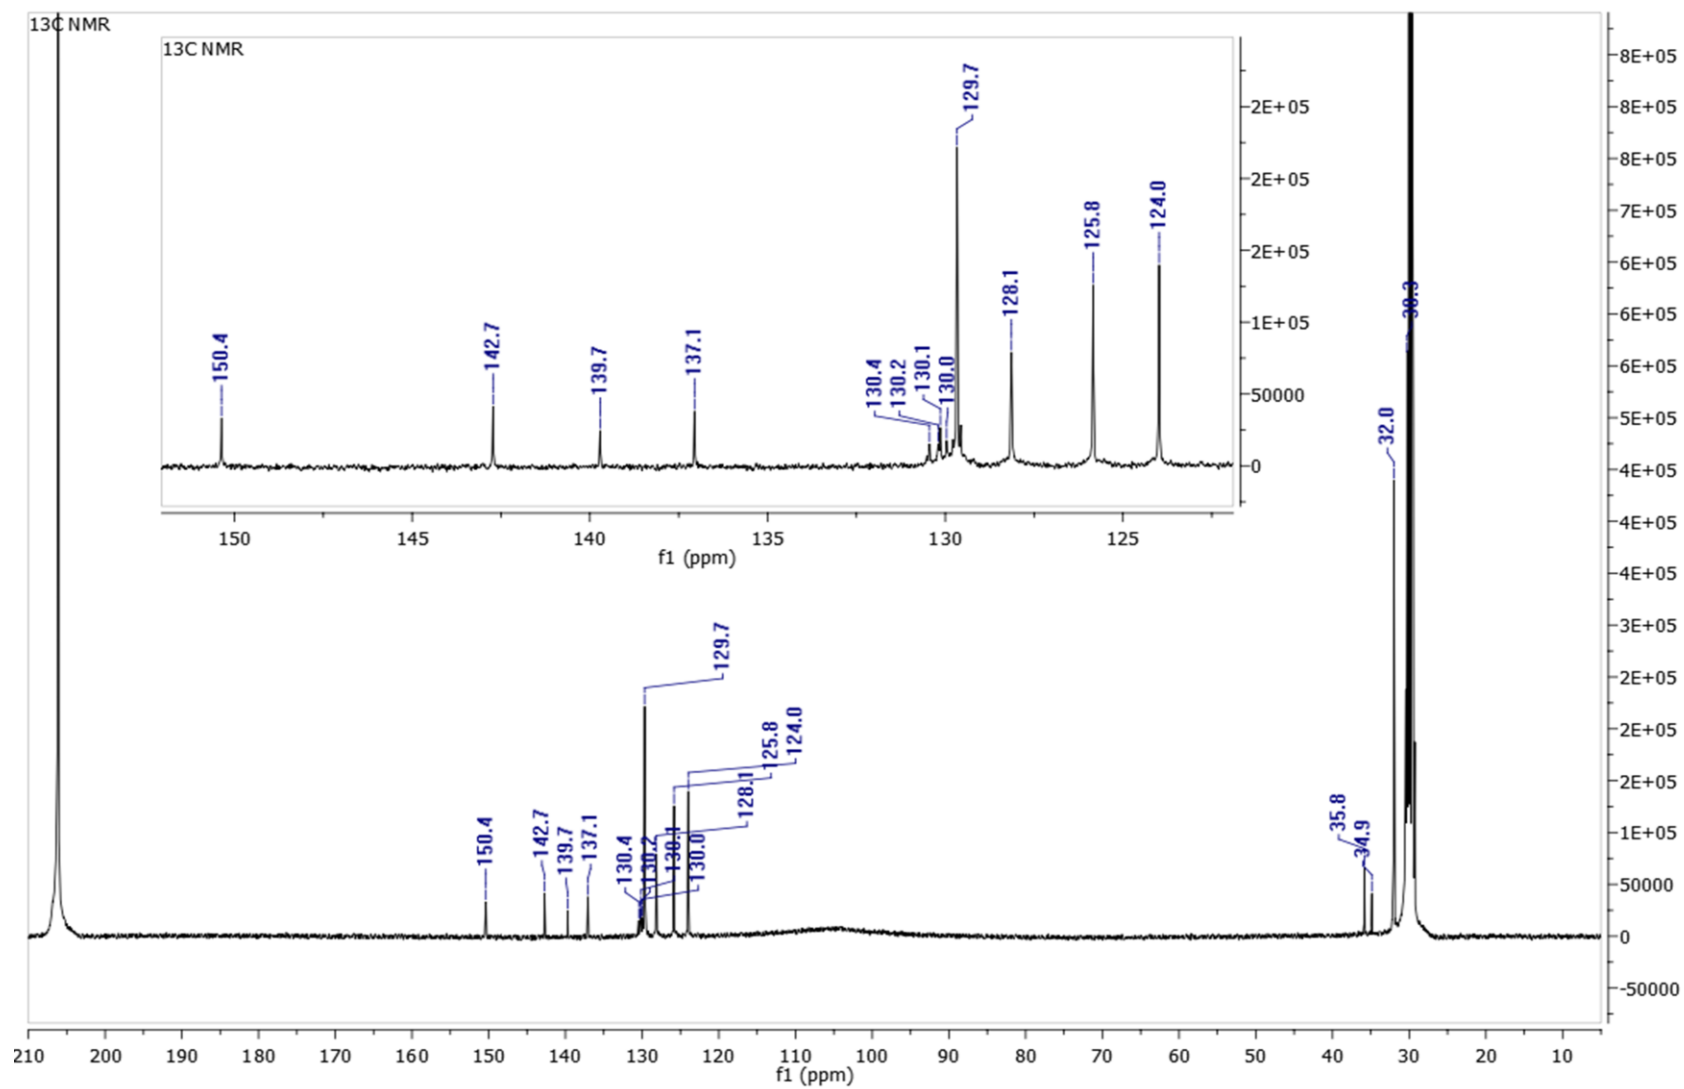

COSY

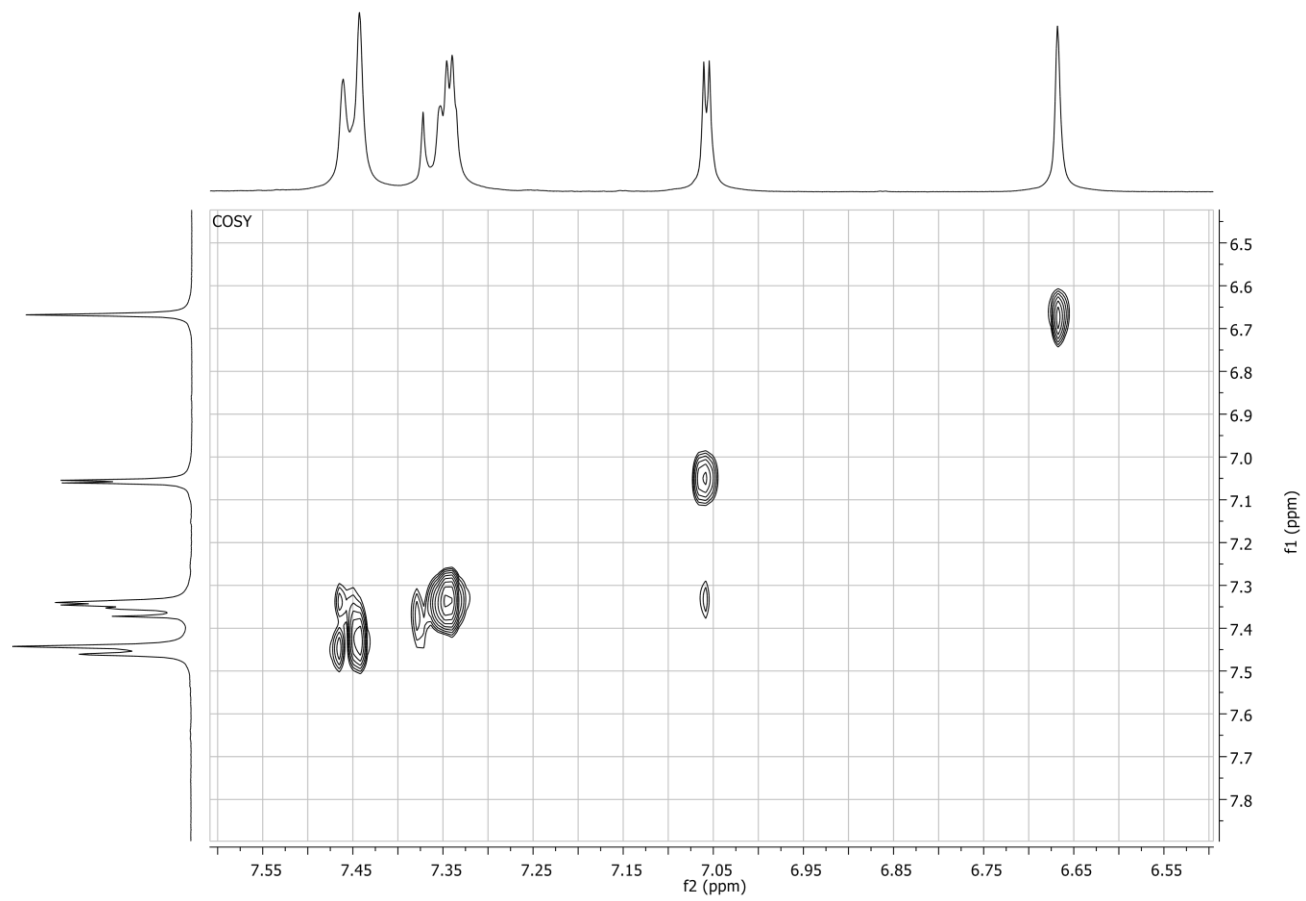

HMBC

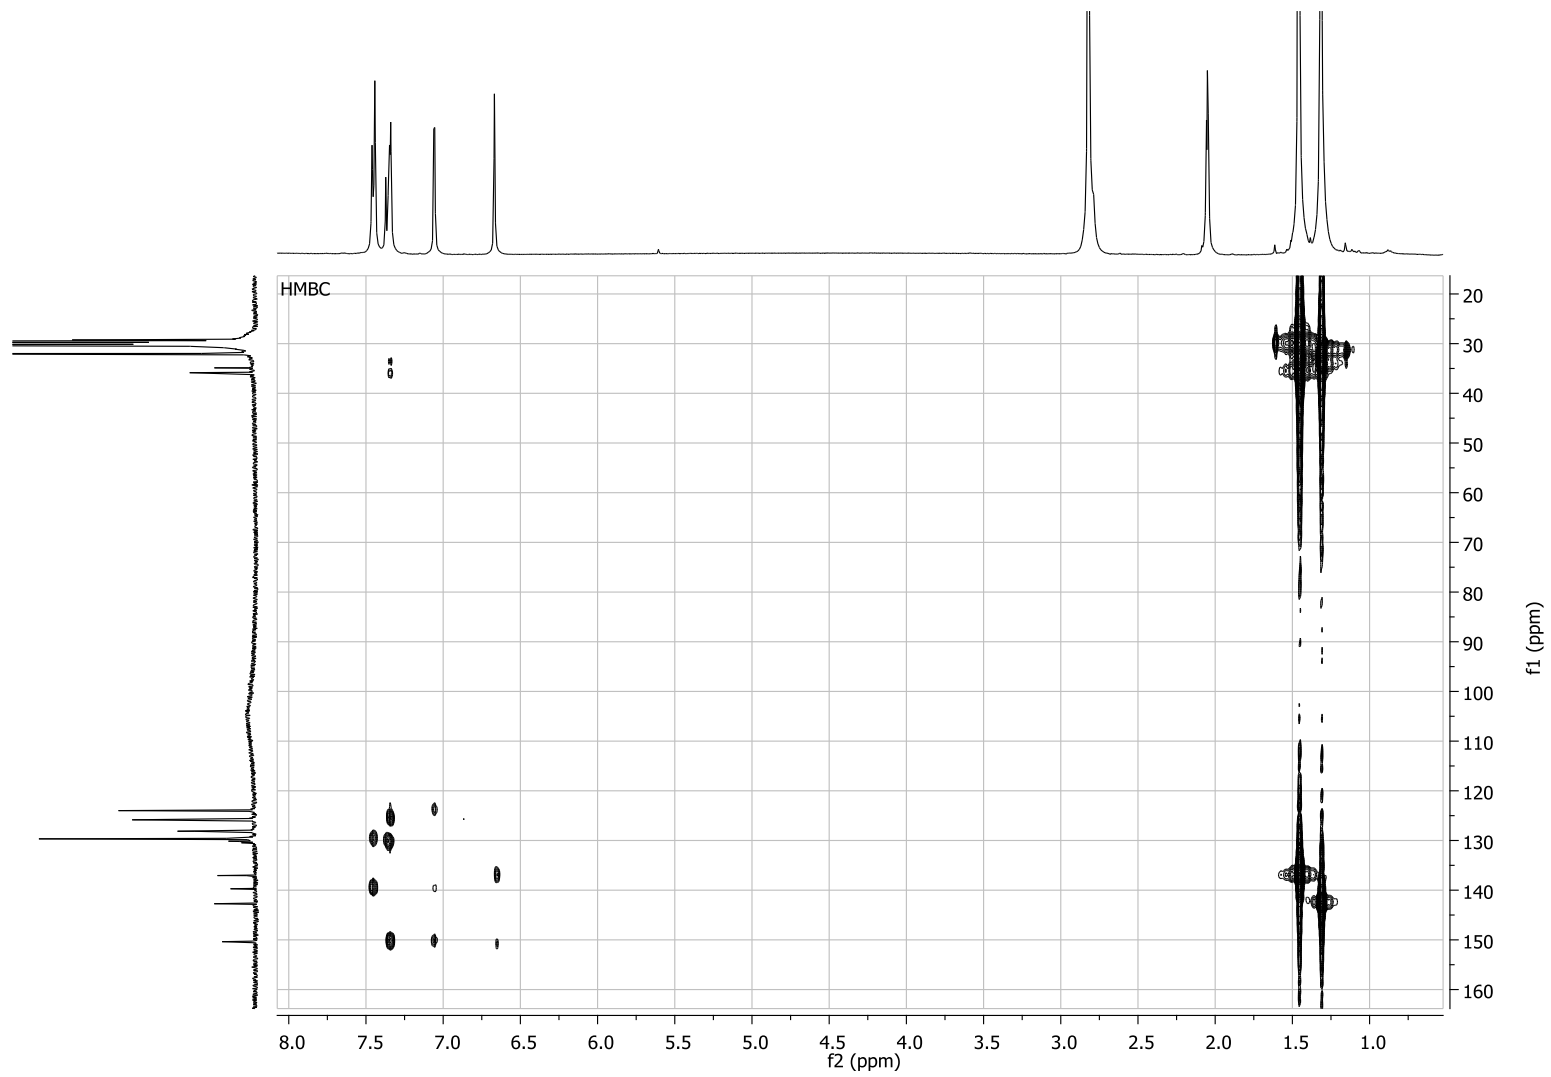

HSQC

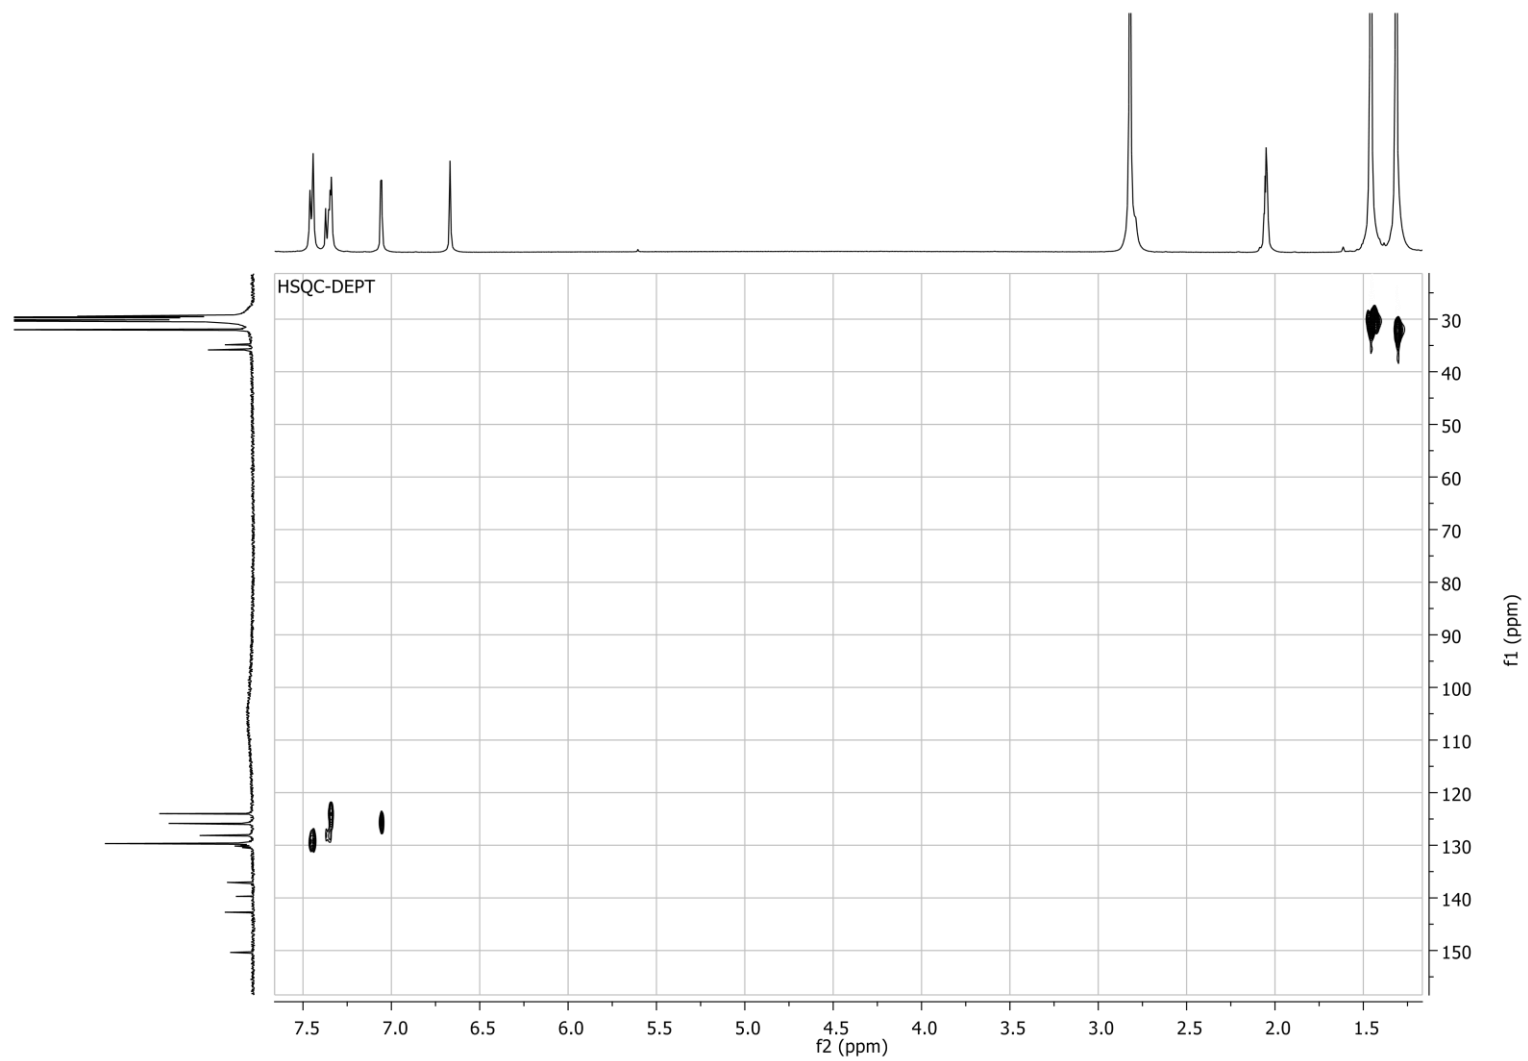

### 3. UV-visible absorption and fluorescence spectra

#### 3.1. UV-Visible absorption spectra at different pH.

The pH was adjusted using different buffers solutions at  $\approx 0.05M$ .

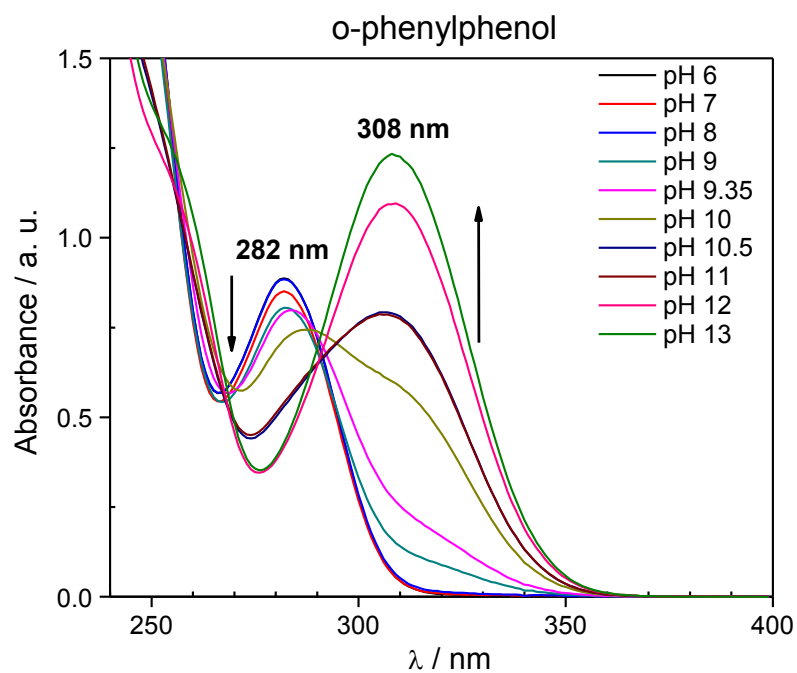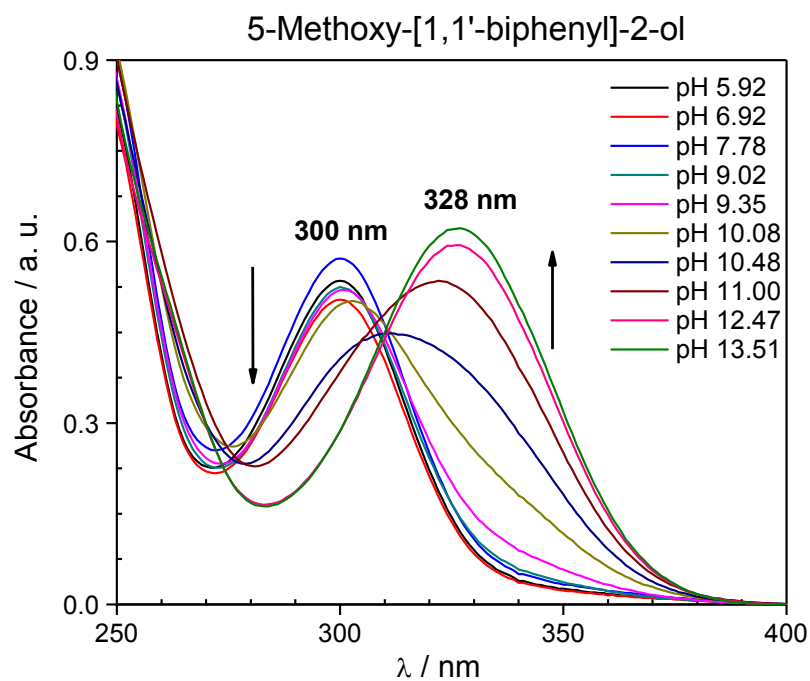

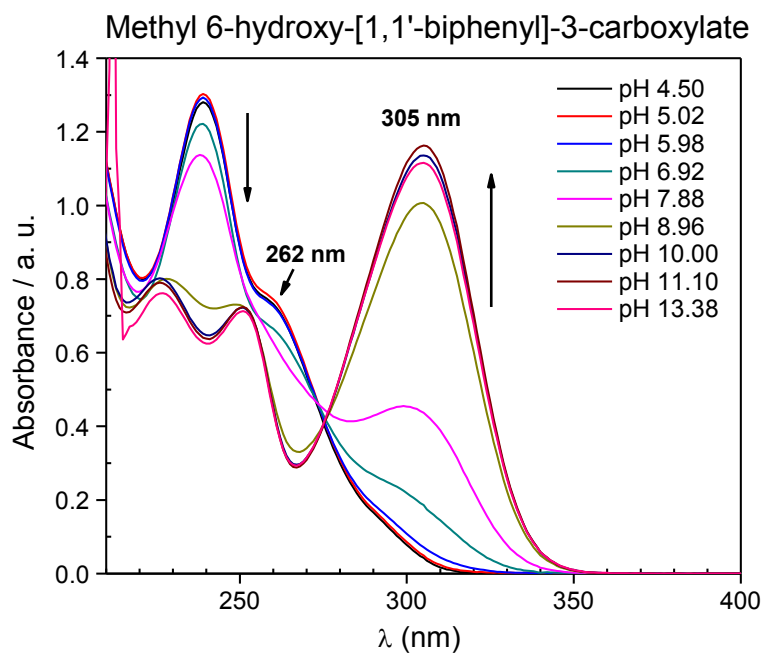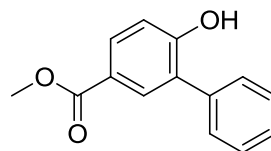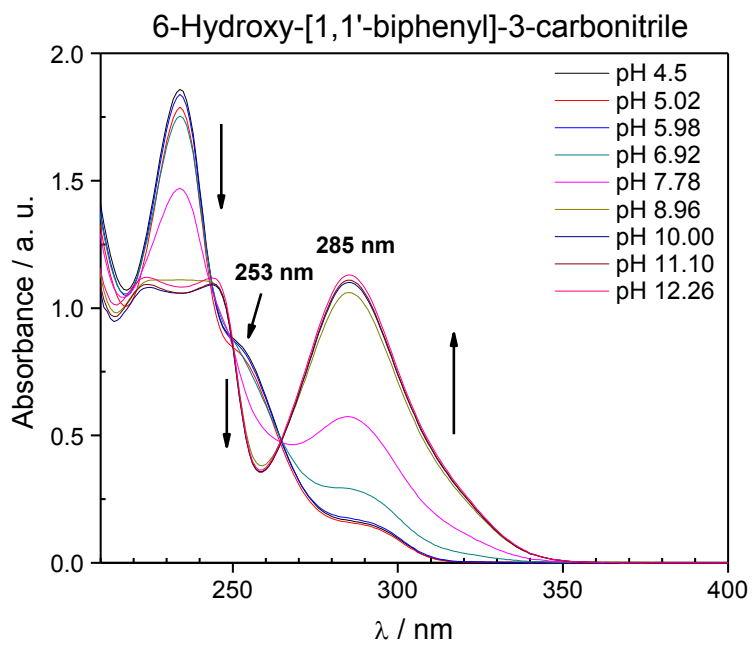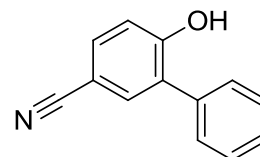



### 3.2 Determination of pKa by UV-Visible absorption.

**2-phenylphenol**

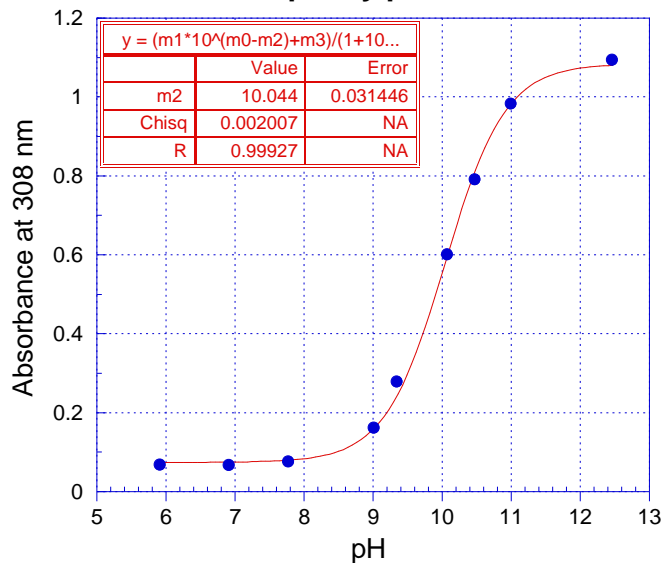

**5-Methoxy-[1,1'-biphenyl]-2-ol**

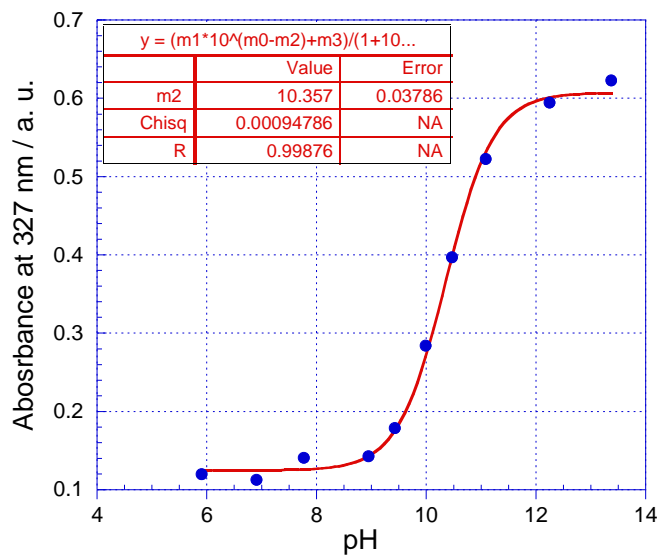

**Methyl 6-hydroxy-[1,1'-biphenyl]-3-carboxylate**

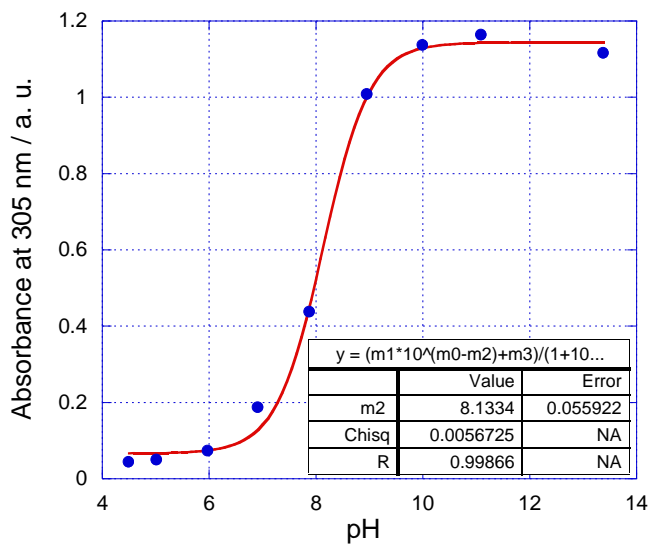

**6-Hydroxy-[1,1'-biphenyl]-3-carbonitrile**

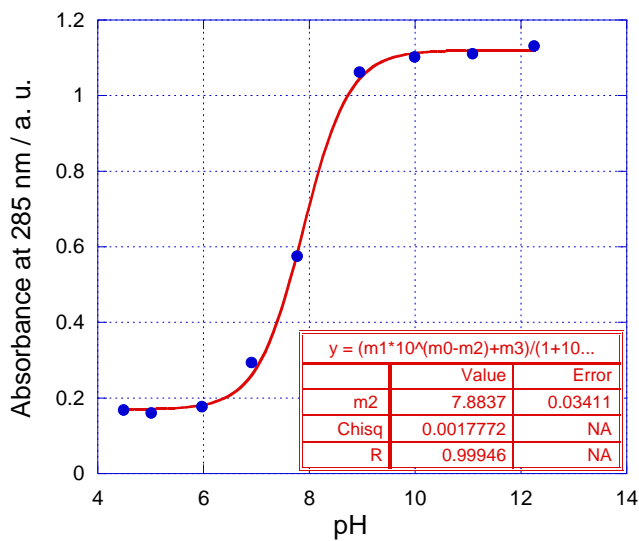

### 3.3. Emission fluorescence spectra at different pH

**o-Phenylphenol**

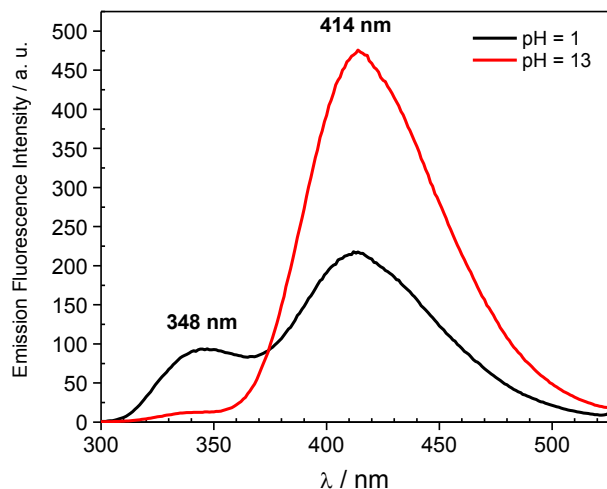

$\lambda_{\text{exc}}$  (pH=1) = 283 nm; Abs (283 nm) = 0.141.  
 $\lambda_{\text{exc}}$  (pH=13) = 283 nm; Abs (283 nm) = 0.141.

**5-Methoxy-[1,1'-biphenyl]-2-ol**

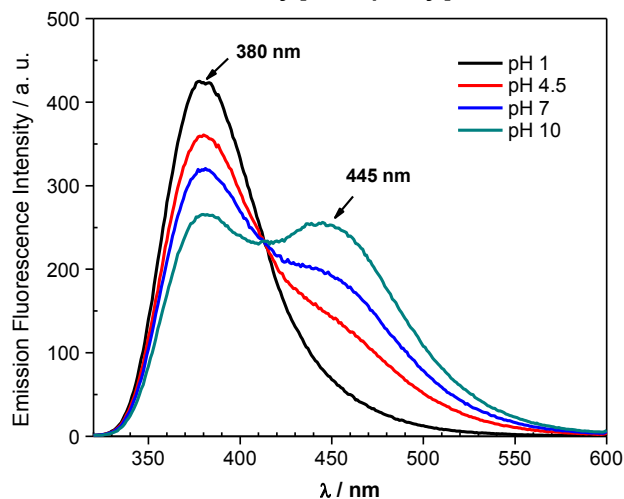

$\lambda_{\text{exc}}$  (pH=1) = 300 nm; Abs (300 nm) = 0.327.  
 $\lambda_{\text{exc}}$  (pH=4.5) = 300 nm; Abs (300 nm) = 0.141.  
 $\lambda_{\text{exc}}$  (pH=7) = 300 nm; Abs (300 nm) = 0.214.  
 $\lambda_{\text{exc}}$  (pH=10) = 327 nm; Abs (327 nm) = 0.376.

**Methyl 6-hydroxy-[1,1'-biphenyl]-3-carboxylate**

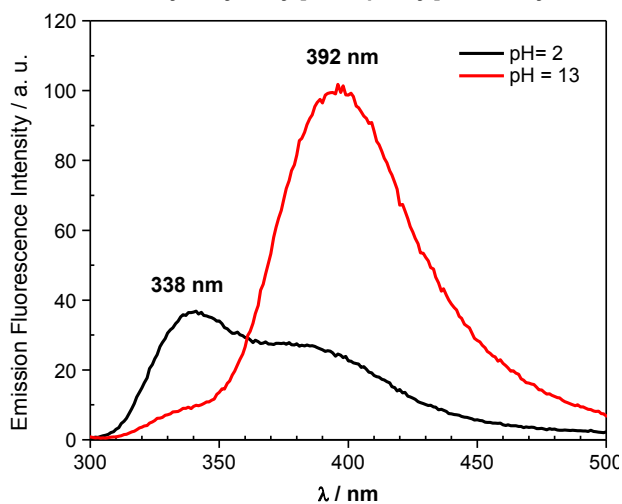

$\lambda_{\text{exc}}$  (pH=2) = 267 nm; Abs (267 nm) = 0.094.  
 $\lambda_{\text{exc}}$  (pH=13) = 305 nm; Abs (305 nm) = 0.133.

**6-Hydroxy-[1,1'-biphenyl]-3-carbonitrile**

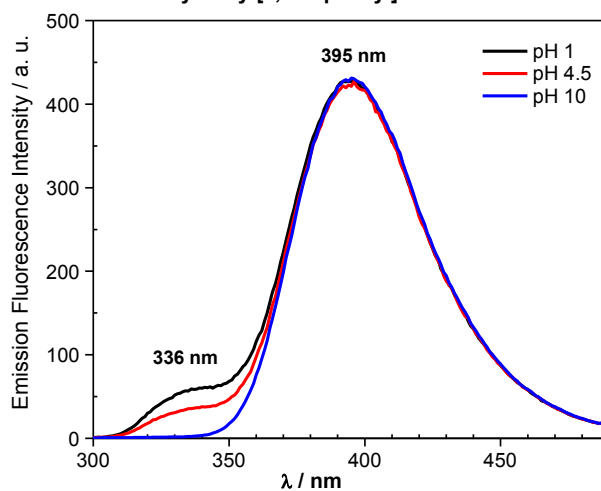

$\lambda_{\text{exc}}$  (pH=1) = 267 nm; Abs (267 nm) = 0.364.  
 $\lambda_{\text{exc}}$  (pH=4.5) = 267 nm; Abs (267 nm) = 0.301.  
 $\lambda_{\text{exc}}$  (pH=10) = 267 nm; Abs (267 nm) = 0.285.

### 3.4 Fluorescence spectra at different solvents, $\lambda_{\text{exc}} = 290 \text{ nm}$ .

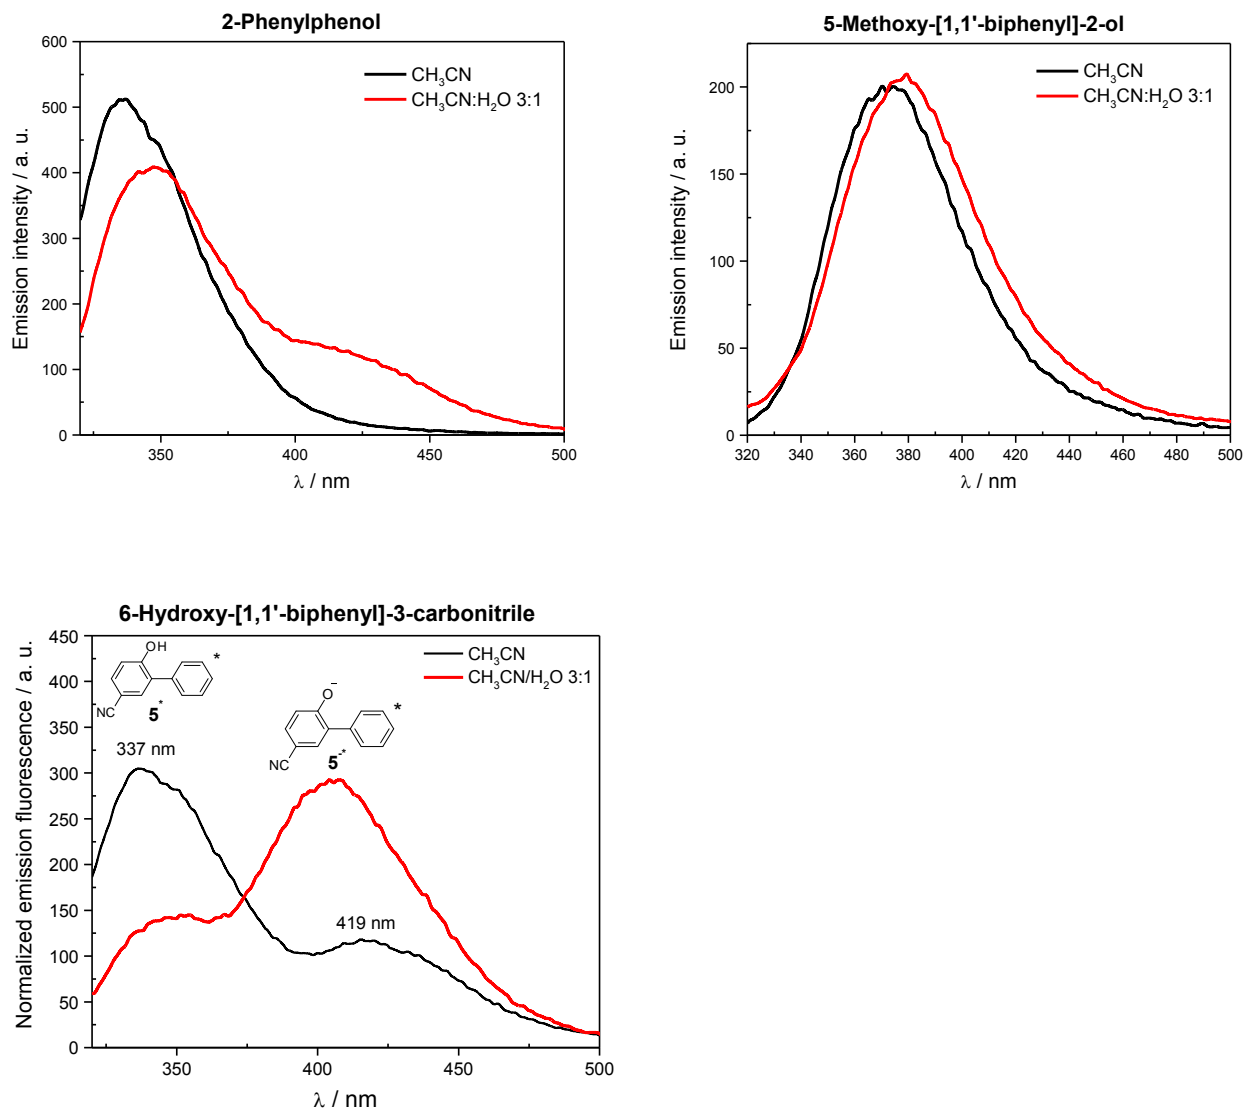

### 3.5 Fluorescence lifetimes of compounds 1, 2 and 5.

Fluorescence lifetimes of unde protonated and de protonated species for compounds **1**, **2** and **5** in water are presented in Table 3.5. The excitation wavelength was 267 nm. Firstly, fluorescence lifetimes of de protonated species were determined at pH=13 for **1** and **5**, where the de protonated form ( $\text{A}^-$ ) was the dominant one. Consequently, lifetimes of de protonated species were determined using mono-exponential fitting of the decay curves. The observed decay at pH=1 (for **1** and **5**) was fitted to a biexponential decay function for each compound giving a short component and a large one corresponding to the unde protonated and de protonated species, respectively.

However for compound **2**, the unde protonated form ( $\text{AH}$ ) was the dominant one at pH=1 and the fluorescence lifetime was determined using a mono-exponential fitting of the decay curve. At pH=13, the observed decay was fitted to a biexponential function. Corrected lifetime values are shown in the following table.

**Table 3.5** Fluorescence lifetime values for compounds **1**, **2** and **5**.

| R                             | $\tau$ (AH) <sup>a</sup> / ns                  | $\tau$ (A <sup>-</sup> ) <sup>b</sup> / ns   |
|-------------------------------|------------------------------------------------|----------------------------------------------|
| H ( <b>1</b> )                | 0.256 ± 0.003<br>0.313 <sup>c</sup> ± 0.005 ns | 3.722 ± 0.006<br>3.73 <sup>c</sup> ± 0.01 ns |
| OCH <sub>3</sub> ( <b>2</b> ) | 1.881 ± 0.006                                  | 5.079 ± 0.009                                |
| CN ( <b>5</b> )               | 0.102 ± 0.005                                  | 1.07 ± 0.04<br>1.12 <sup>a</sup> ± 0.01      |

<sup>a</sup> Fluorescence lifetime measured at pH=1. <sup>b</sup> Fluorescence lifetime measured at pH =13. <sup>c</sup> Fluorescence lifetime measured at pH =7.

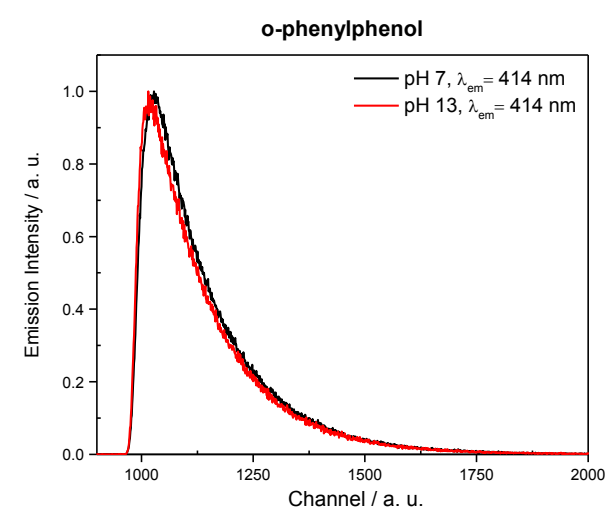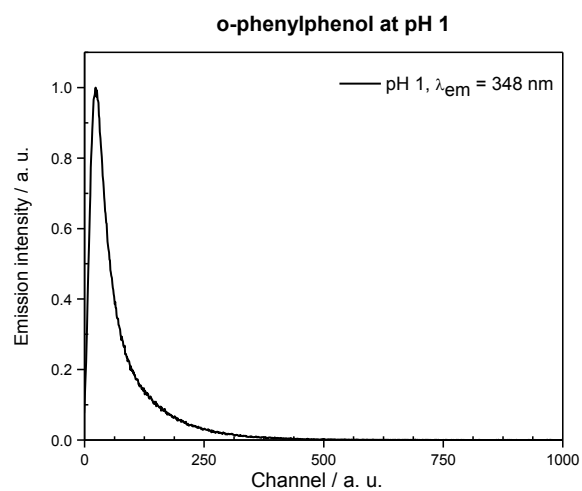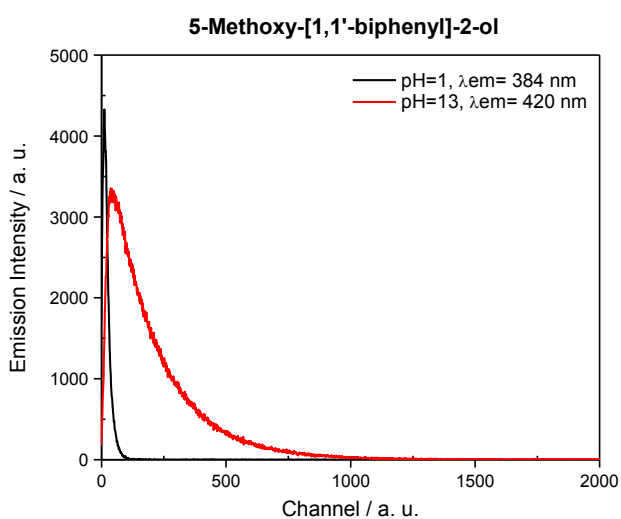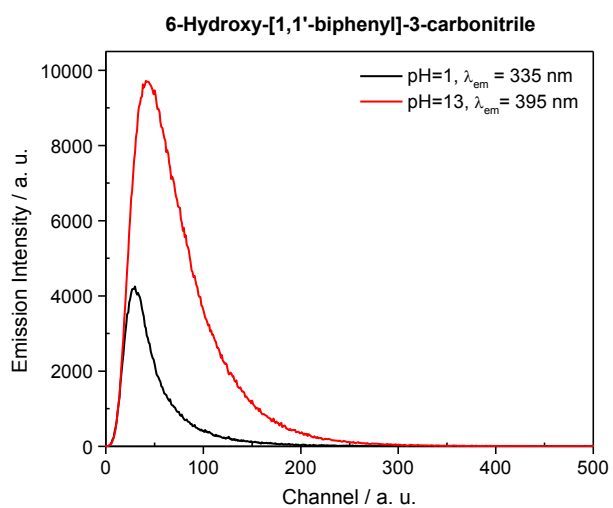

## 4. Theoretical calculations

### 4.1 $pK_a$ Calculation

For the computation of  $pK_a$  the method reported by Thapa *et al.* (*J. Phys. Chem. A* **2017**, *121*, *24*, 4698-4706) was followed. Geometries of **1-5** were fully optimized in water (SMD model) at B3LYP/6-311++G(d,p) level of theory. Harmonic frequencies were calculated in order to confirm structures were minima on ground-state PES, and to get thermal corrections for free energies. According to the reported procedure, three explicit water molecules were included directly hydrogen-bonded to the site being protonated or deprotonated (Fig. S1).

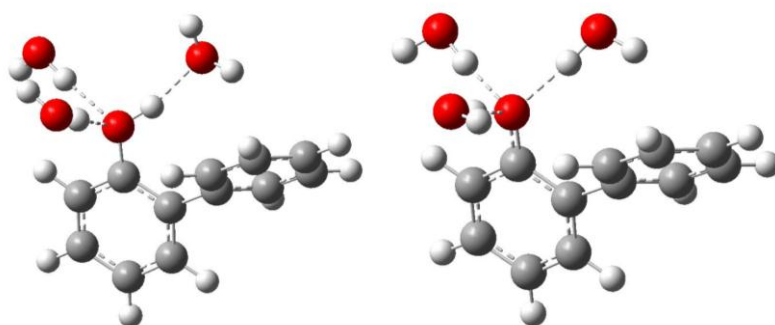

**Figure S1.** Optimized structures of the micro-solvated protonated and deprotonated species of **1** compound.

The  $pK_a$  for the considered acid-base reaction is given by

$$pK_a = \frac{\Delta G_{aq}^*}{2.303 RT} = \frac{G_{aq,RO^-}^* + G_{aq,H^+}^* - G_{aq,ROH}^*}{2.303 RT}$$

where  $G_{aq,ROH}^*$  and  $G_{aq,RO^-}^*$  are the standard free energies of protonated and deprotonated phenols in aqueous solution, respectively. The free energy of a proton in aqueous solution is calculated as

$$G_{aq,H^+}^* = G_{H^+,g}^0 + \Delta G_{H^+,aq}^* + \Delta G^{1atm \rightarrow 1M}$$

Where  $G_{g,H^+}^0 = H_{g,H^+}^0 - TS_{g,H^+}^0$  is the gas phase free energy of proton at 298.15 K (from  $H_{g,H^+}^0 = 5RT/2 = 1.48 \text{ kcal/mol}$  and  $S_{g,H^+}^0 = 26.05 \text{ cal/(mol} \cdot \text{K)}$ ),  $\Delta G_{aq,H^+}^0 = -265.9 \text{ kcal/mol}$  is the aqueous phase solvation free energy of the proton and  $\Delta G^{1atm \rightarrow 1M} = RT \log(24.4) = 1.89 \text{ kcal/mol}$  is the correction term necessary for the change in standard state from 1 atm to 1mol/L.

**Table S1.** Calculation of  $pK_a$  of 2-phenylphenol derivatives in water using explicit water molecules and SMD model

| Compound | Substituent  | $G^\circ$ (a.u.) phenol <sup>[a]</sup> | $G^\circ$ (a.u.) anion <sup>[a]</sup> | Predicted $pK_a$ | Experiment $pK_a$ | MSE <sup>[b]</sup> | St. Dev. <sup>[c]</sup> |
|----------|--------------|----------------------------------------|---------------------------------------|------------------|-------------------|--------------------|-------------------------|
| <b>1</b> | H            | -767.90313                             | -767.45156                            | 9.59             | 10.04             | 1.32               | 0.68                    |
| <b>2</b> | OMe          | -882.43057                             | -881.97989                            | 9.18             | 10.36             |                    |                         |
| <b>3</b> | <i>t</i> -Bu | -925.09233                             | -924.64056                            | 9.68             | -                 |                    |                         |
| <b>4</b> | COOMe        | -995.82022                             | -995.37536                            | 6.50             | 8.13              |                    |                         |
| <b>5</b> | CN           | -860.17885                             | -859.73541                            | 5.85             | 7.88              |                    |                         |

<sup>[a]</sup> Standard free energy (Hartree). <sup>[b]</sup> Mean signed error. <sup>[c]</sup> Standard deviation

As the  $pK_a$  of *t*-butyl containing derivative **3** could not be experimentally determined due to the poor solubility of **3** in water, the theoretical  $pK_a$  estimation was necessary. For this reason, the method proposed by Ugur *et al.* (*J. Chem. Inf. Model.* **2014**, 54, 8, 2200-2213) was employed for the prediction of the  $pK_a$  since it allows to obtain accurate and fast results. Nevertheless, for the application of this method it is necessary to have a trustworthy set of experimental  $pK_a$ 's. In our case, we determined the linear relationship between atomic charges and experimental  $pK_a$ 's for a training set including 2-phenylphenols **1**, **2**, **4** and **5**. The NPA (Natural Population Analysis) atomic charge of the O atom for the anionic forms of the aforementioned 2-phenylphenols was associated with the experimental  $pK_a$  of each molecule in order to establish a linear fit (Fig. S2). The equation obtained by least-squares fit was then used for the  $pK_a$  prediction for derivative **3**.

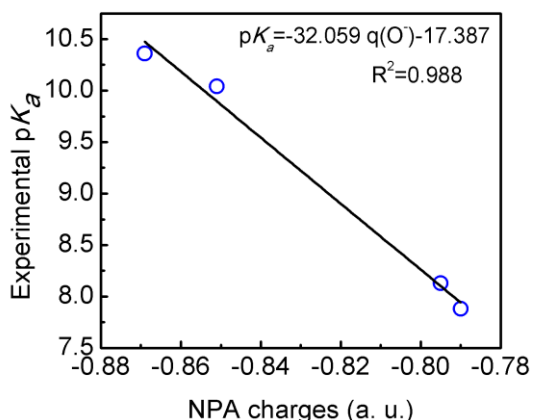**Figure S2.** Experimental  $pK_a$  vs. NPA charges.**Table S2.** NPA computed charges and predicted  $pK_a$  values

| Compound | NPA atomic charge O <sup>-</sup> (a. u.) | $pK_a$ (Pred.) |
|----------|------------------------------------------|----------------|
| 1        | -0.851                                   | 9.89           |
| 2        | -0.869                                   | 10.47          |
| <b>3</b> | <b>-0.859</b>                            | <b>10.15</b>   |
| 4        | -0.795                                   | 8.10           |
| 5        | -0.790                                   | 7.94           |

If we compare the two methodologies employed for the calculation of the  $pK_a$  of **3**, is evident that the latter one affords a more reasonable result (Table S2), at least higher than the value obtained for **1**, as could be expected for a phenol having an electron donating group.

## 4.2 $pK_a^*$ calculation

As the experimental determination of  $pK_a^*$  was achieved by using the Förster cycle, the same method was applied for the theoretical determination. For that purpose, the absorption and

fluorescence vertical transition energies of unde protonated and de protonated species were calculated using PCM solvation model (solvent=water) with the linear response (LR) scheme at CAM-B3LYP/6-31+G(d) level of theory. The absorption energies for the unde protonated species of **1**, **2** and **3** derivatives were computed at B3LYP/6-31+G(d) level, since the vertical transition energies predicted by the long range corrected functional CAM-B3LYP are blue-shifted, compared with the experimental values. In a few cases the computed energies were refined using the non-equilibrium state specific correction in order to obtain deeper accuracy. The results of the calculations are shown in Table S4.

**Table S3.** Experimental and theoretical determined absorption and emission energies at CAM-B3LYP/6-31+G(d) level of theory

|              | Phenol absorption (nm) |                          | Phenol emission (nm) |                          | Phenoxide absorption (nm) |                          | Phenoxide emission (nm) |                    |
|--------------|------------------------|--------------------------|----------------------|--------------------------|---------------------------|--------------------------|-------------------------|--------------------|
|              | Exp                    | Theo                     | Exp                  | Theo                     | Exp                       | Theo                     | Exp                     | Theo               |
| H            | 282                    | 271 <sup>[a]</sup> (251) | 348                  | 345                      | 308                       | 300 (331) <sup>[b]</sup> | 414                     | 398                |
| OMe          | 300                    | 302 <sup>[a]</sup> (274) | 380                  | 364 (347) <sup>[b]</sup> | 328                       | 326 (357) <sup>[b]</sup> | 445                     | 432                |
| <i>t</i> -Bu | -                      | 282 <sup>[a]</sup> (258) | -                    | 343                      | -                         | 326 (335) <sup>[b]</sup> | -                       | 383 <sup>[b]</sup> |
| COOMe        | 262                    | 251                      | 338                  | 342                      | 305                       | 307                      | 392                     | 380                |
| CN           | 253                    | 250                      | 336                  | 344                      | 285                       | 308                      | 395                     | 380                |

<sup>[a]</sup> Calculated with B3LYP/6-31+G(d). In parenthesis, values obtained with LR-CAM-B3LYP/6-31+G(d). <sup>[b]</sup> Calculated using the non-equilibrium state specific correction. In parenthesis, values obtained using linear response formalism.

$pK_a^*$  can be obtained using the following equation, in the same manner as for the experimental determination:

$$\Delta pK_a^* = pK_a - pK_a^* = \frac{0.625 (vArOH - vArO^-)}{T}$$

**Table S4.** Theoretically simulated  $pK_a^*$  values for compounds **1-5**.

| Substituent  | $\lambda$ average phenol <sup>[a]</sup> | $\lambda$ average phenoxide <sup>[a]</sup> | $\Delta E$ (cm <sup>-1</sup> ) <sup>[b]</sup> | $pK_a^*$ <sub>[c]</sub> <sup>(Theo)</sup> | $pK_a^*$ <sup>(Exp)</sup> | MSE   | St. Dev. |
|--------------|-----------------------------------------|--------------------------------------------|-----------------------------------------------|-------------------------------------------|---------------------------|-------|----------|
| H            | 308                                     | 349                                        | -3814.237                                     | 2.07                                      | 1.59                      |       |          |
| OMe          | 333                                     | 379                                        | -3644.806                                     | 2.74                                      | 2.96                      |       |          |
| <i>t</i> -Bu | 312.5                                   | 354.5                                      | -3791.255                                     | 2.22                                      | -                         | -0.04 | 0.27     |
| COOMe        | 296.5                                   | 343.5                                      | -4614.731                                     | -1.51                                     | -1.56                     |       |          |
| CN           | 297                                     | 344                                        | -4600.266                                     | -1.73                                     | -1.62                     |       |          |

<sup>[a]</sup>  $\lambda_{aver} = (\lambda_{Abs} + \lambda_{Em})/2$  <sup>[b]</sup>  $\lambda_{aver\ phenoxide} - \lambda_{aver\ phenol}$  <sup>[c]</sup>  $pK_a^* = pK_a + (\Delta E * 0.00209)$

### 4.3. Theoretical modeling of ESIPT process

All DFT and TD-DFT calculations were performed with Gaussian 09 package. Geometry optimizations were fully calculated by using the range-separated correction of the B3LYP functional, CAM (Coulomb-Attenuating Method), with the 6-31+G(d) basis set. The minima were characterized by Hessian diagonalization and further harmonic frequency analyses to obtain the

zero-point and thermal corrections for the energies, enthalpies and free energies. All optimizations and frequency analyses were performed within the PCM model for acetonitrile.

**Table S5.** Total energies,<sup>(a)</sup> zero point and thermal corrections to the standard free energy in atomic units.

| Structures               | $E_{el}^b$ | ZPE <sup>c</sup> | $E_{el} + ZPE$ | $G^\circ$  |
|--------------------------|------------|------------------|----------------|------------|
| <b>1</b> enol form $S_0$ | -538.25269 | 0.18786          | -538.06483     | -538.10093 |
| <b>1</b> enol form $S_1$ | -538.09489 | 0.18420          | -537.91069     | -537.94686 |
| <b>1</b> keto form $S_0$ | -538.19565 | 0.18630          | -538.00935     | -538.04579 |
| <b>1</b> keto form $S_1$ | -538.12712 | 0.18513          | -537.94198     | -537.97839 |
| <b>2</b> enol form $S_0$ | -652.73354 | 0.22069          | -652.51284     | -652.55249 |
| <b>2</b> enol form $S_1$ | -652.58385 | 0.21751          | -652.36633     | -652.40552 |
| <b>2</b> keto form $S_0$ | -652.67429 | 0.21913          | -652.45516     | -652.49549 |
| <b>2</b> keto form $S_1$ | -652.61713 | 0.21928          | -652.39784     | -652.43700 |
| <b>5</b> enol form $S_0$ | -630.46447 | 0.18673          | -630.27774     | -630.31638 |
| <b>5</b> enol form $S_1$ | -630.30438 | 0.18304          | -630.12134     | -630.16000 |
| <b>5</b> keto form $S_0$ | -630.40826 | 0.18490          | -630.22336     | -630.26250 |
| <b>5</b> keto form $S_1$ | -630.33300 | 0.18315          | -630.14985     | -630.18950 |

<sup>a</sup> All energies in Hartree. <sup>b</sup> Total electronic energies. <sup>c</sup> Zero-Point Energy corrections

#### 4.3.1. Potential energy surfaces

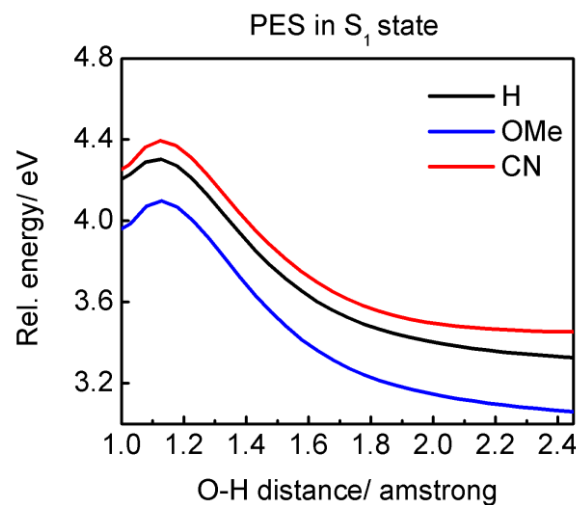

**Figure S3.** Relaxed scan of the  $S_1$  state along the O-H stretching coordinate for compounds **1**, **2** and **5**.



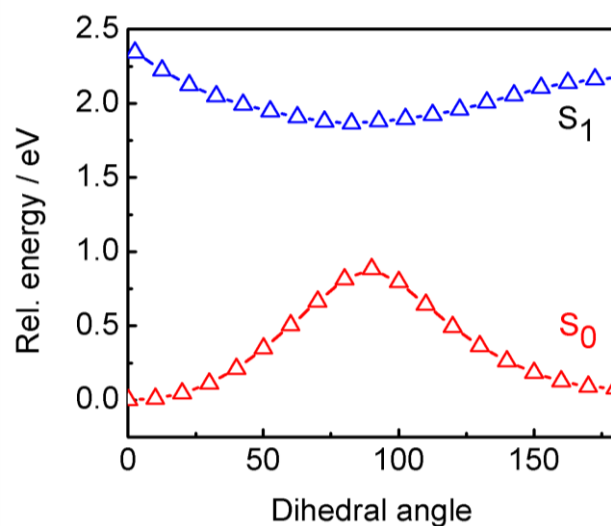

**Figure S4.** Potential energy surfaces for torsion rotation around the C2-C1' bond of **1** in S<sub>0</sub> and S<sub>1</sub> states.

#### 4.3.2. Vertical excitations

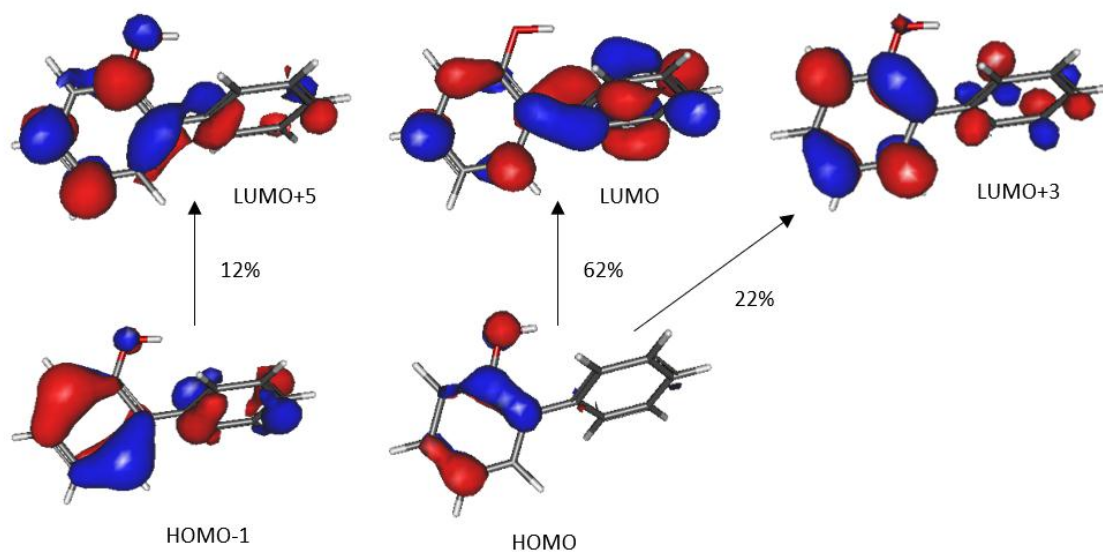

**Figure S5.** Molecular orbitals involved in the vertical transition to the S<sub>1</sub> state of **1** at ground state equilibrium geometry.

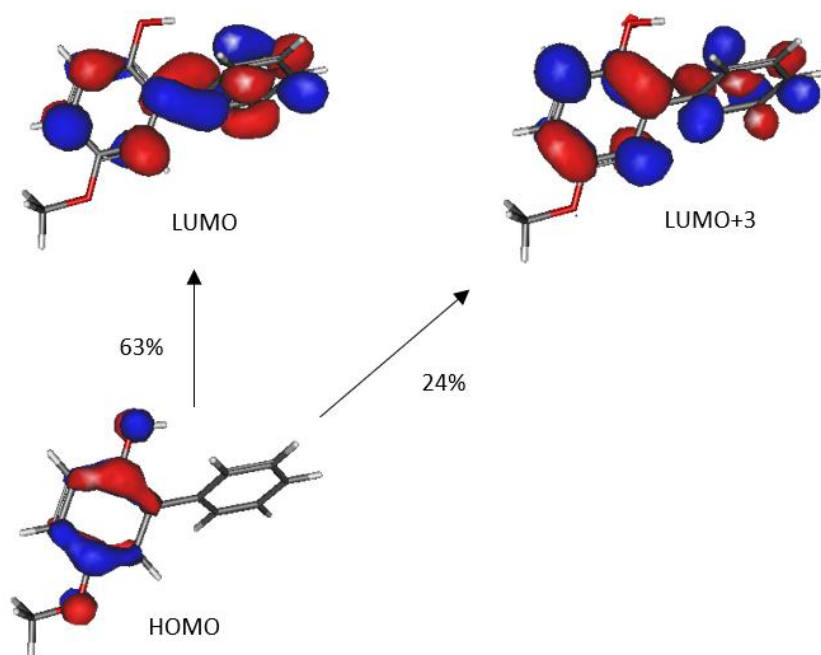

**Figure S6.** Molecular orbitals involved in the vertical transition to the  $S_1$  state of **2** at ground state equilibrium geometry.

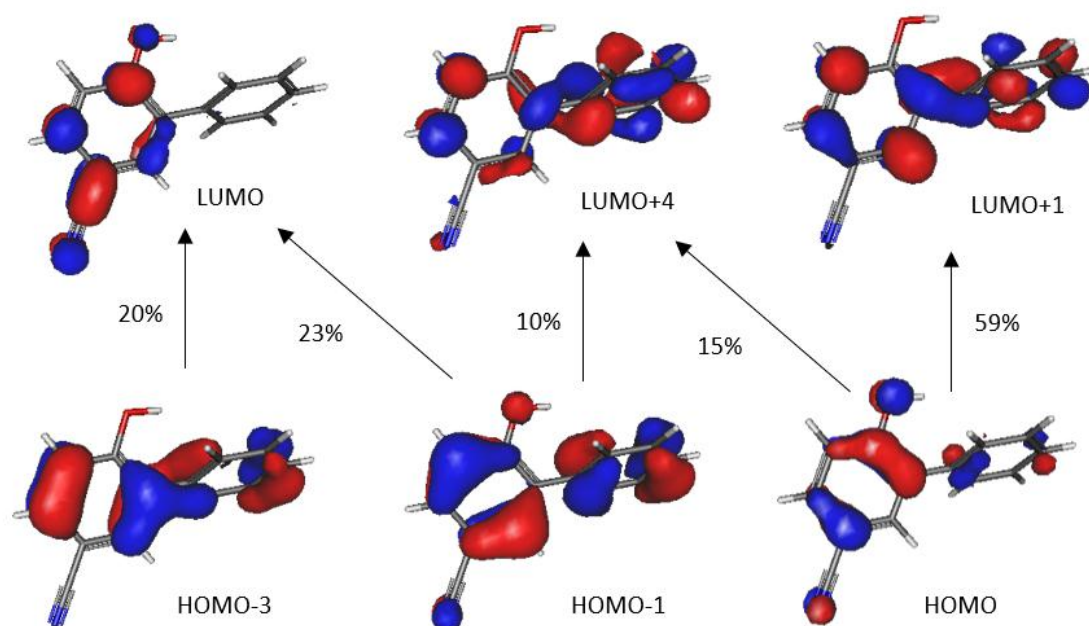

**Figure S7.** Molecular orbitals involved in the vertical transition to the  $S_1$  state of **5** at ground state equilibrium geometry.

### 4.3.3. Non-covalent interactions (NCI) analysis

For analyzing the OH-- $\pi$  interaction the RDG function has been used

$$RDG(r) = \frac{1}{2(3\pi^2)^{1/3}} \frac{|\nabla\rho(r)|}{\rho(r)^{4/3}} \quad (1)$$

where  $\rho(r)$  is the total electron density and the RDG ( $r$ ) is the reduced density gradient of the exchange contribution. According to Atoms in Molecules (AIM) theory the nature of a weak interaction depends on both the  $\lambda_2$  eigenvalue and the electron density:

$$\Omega(r) = \text{Sign}(\lambda_2(r))\rho(r) \quad (2)$$

When  $\lambda_2 > 0$  the interaction is bonding, and the opposite if  $\lambda_2 < 0$ . In Fig. S8 (top) the visual diagram of RDG isosurfaces (isovalue=0.6) shows the existence of a weak bonding interaction between the OH and the aromatic system in both  $S_0$  and  $S_1$  state. In the Fig. S8 (bottom) the scatter plots of RDG function vs.  $\Omega(r)$  function are shown for **1** in  $S_0$  and  $S_1$  states. It is important to note that the left spike shifts to the left in  $S_1$ , indicating a strengthening in the OH- $\pi$  interaction upon excitation.

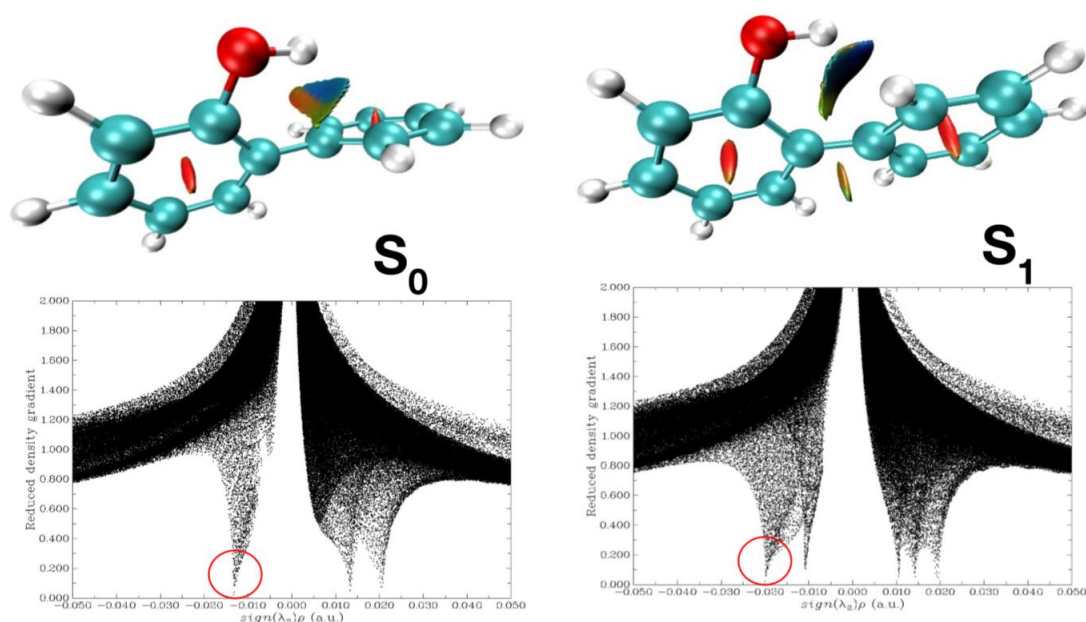

**Figure S8.** Top: Color-filled isosurface graph at equilibrium geometries for **1** (isovalue=0.6, color code: blue=strong attraction; green=vdW interactions, red=strong repulsion). Bottom: RDG scatter plot (isovalue=0.6). The left spike correspond to the attractive OH- $\pi$  interaction.

#### 4.3.4. IR frequencies

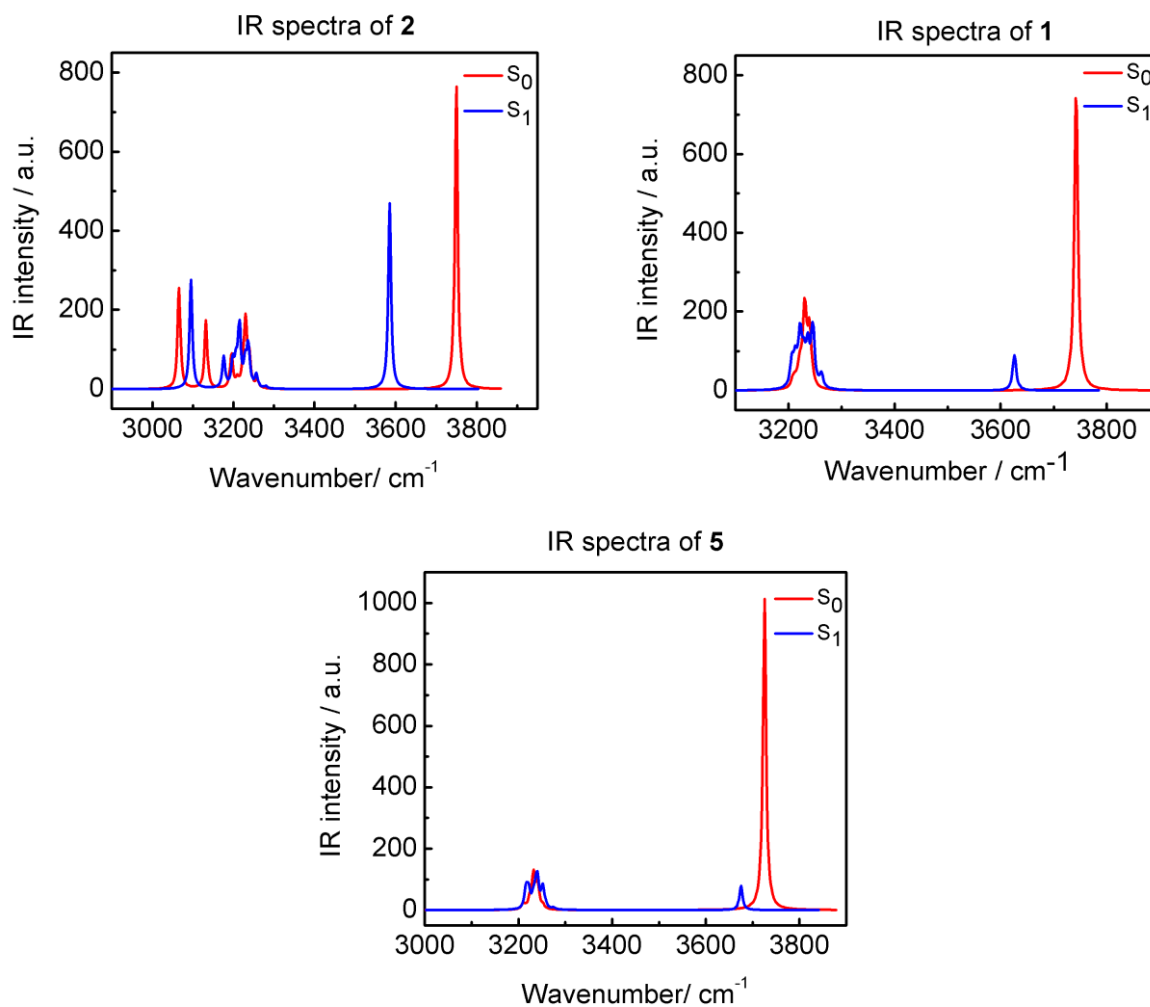

**Figure S9.** IR spectra of **1**, **2** and **5** in  $S_0$  and  $S_1$  states depicting the red shifting of O-H stretching mode upon excitation.

### 4.3.5 Relevant optimized structures

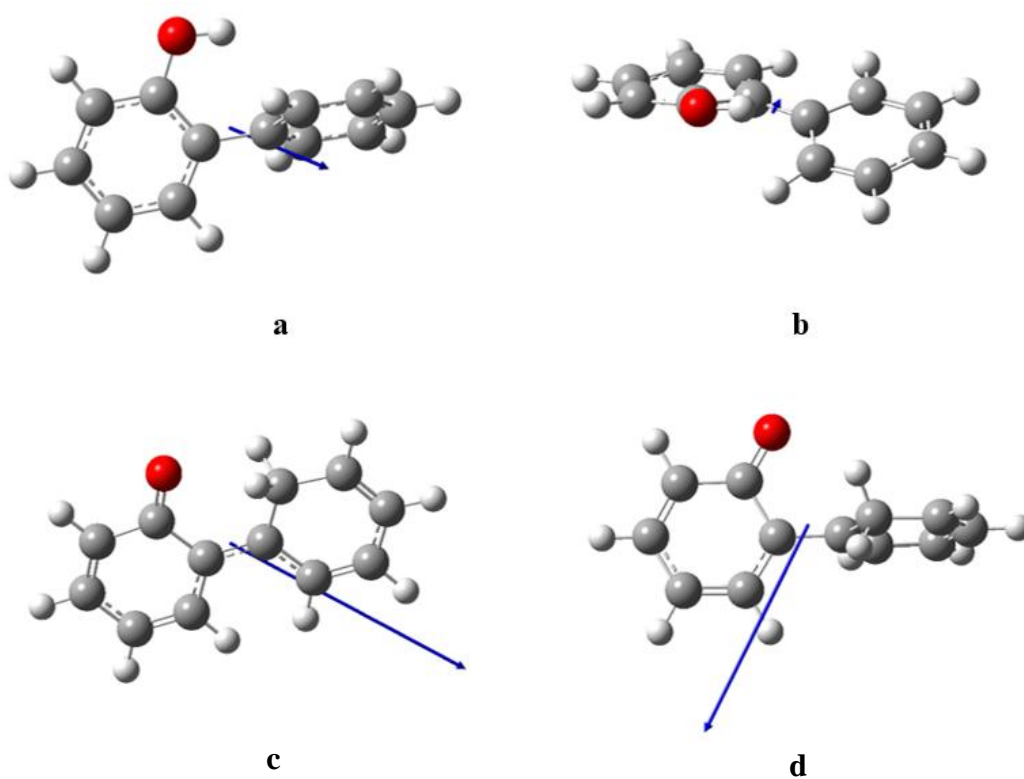

**Figure S10.** Structures of enol and keto forms along  $S_0$  and  $S_1$  surfaces for **1**. a) Enol  $S_0$  form (E). b) Enol  $S_1$  form ( $E^*$ ). c) Keto  $S_0$  form (K). d) Keto  $S_1$  form ( $K^*$ ).

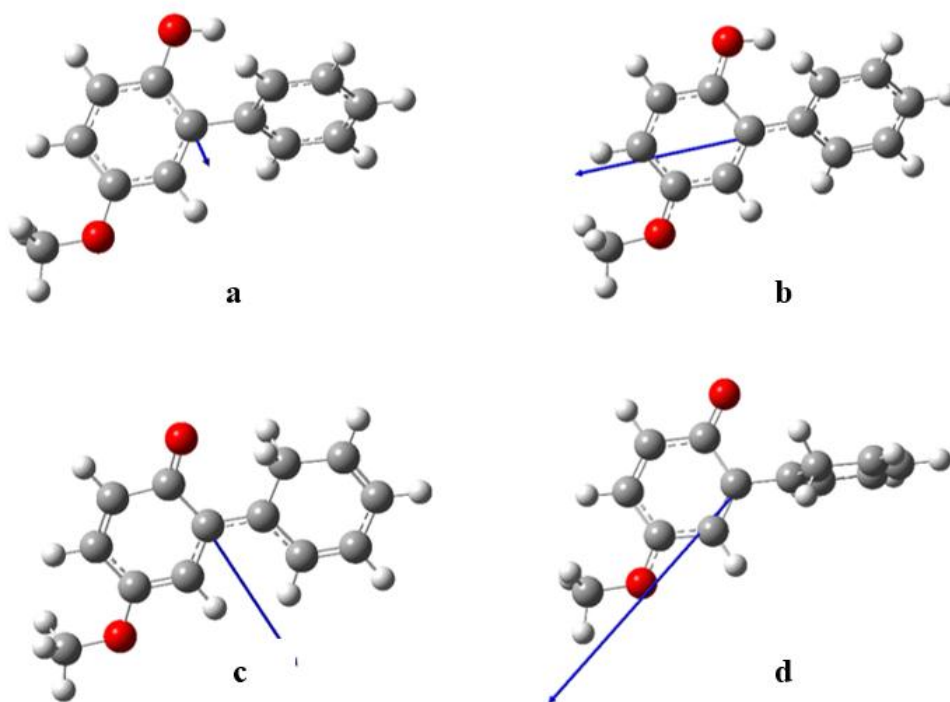

**Figure S11.** Structures of enol and keto forms along  $S_0$  and  $S_1$  surfaces for **2**. a) Enol  $S_0$  form (E). b) Enol  $S_1$  form ( $E^*$ ). c) Keto  $S_0$  form (K). d) Keto  $S_1$  form ( $K^*$ ).

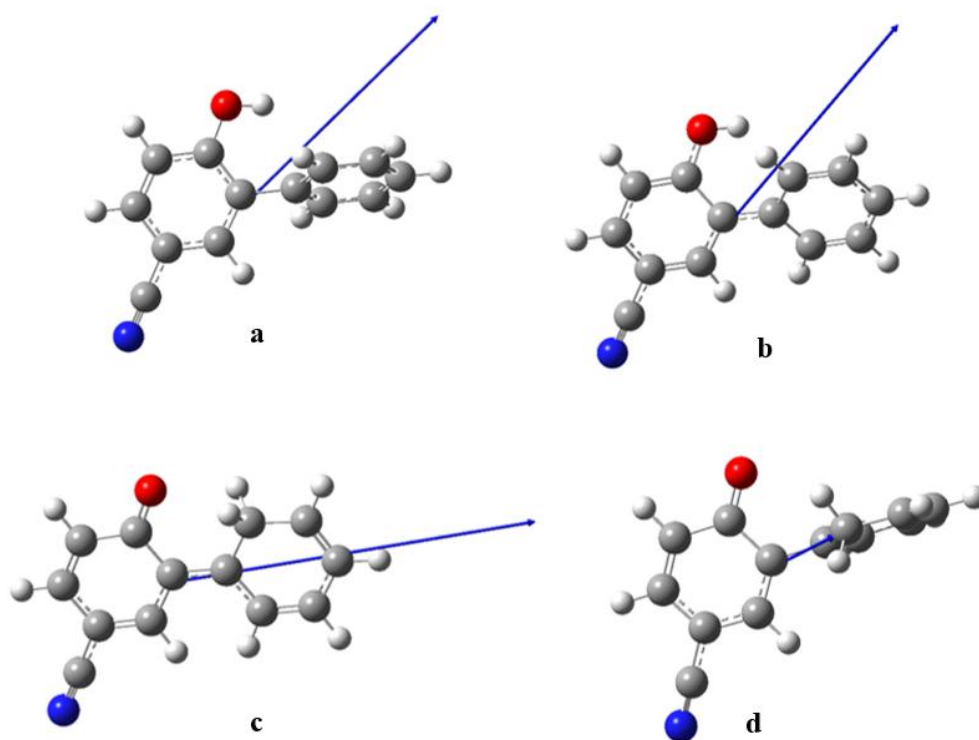

**Figure S12.** Structures of enol and keto forms along  $S_0$  and  $S_1$  surfaces for **5**. a) Enol  $S_0$  form (E). b) Enol  $S_1$  form (E\*). c) Keto  $S_0$  form (K). d) Keto  $S_1$  form (K\*).

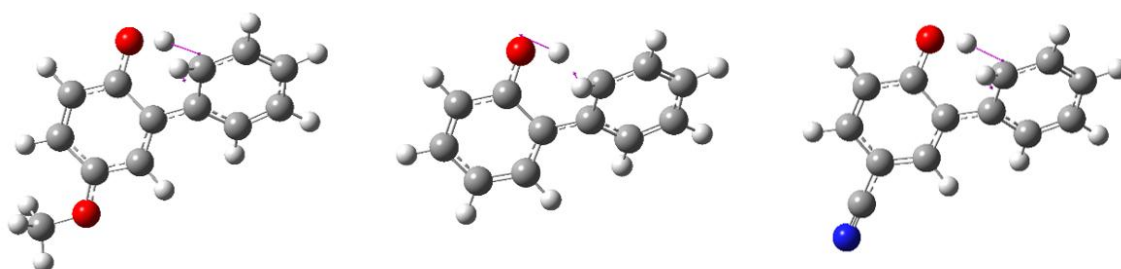

**Figure S13.** Structures of  $S_1$  transition state for **2**, **1** and **5** showing the displacement vectors over the imaginary frequency mode. The obtained imaginary frequency values ( $-973.56\text{ cm}^{-1}$ ,  $-1110.35\text{ cm}^{-1}$  and  $-1112.74\text{ cm}^{-1}$  for **1**, **2** and **5**, respectively) are in reasonable agreement with the expectable for proton transfer transition states.

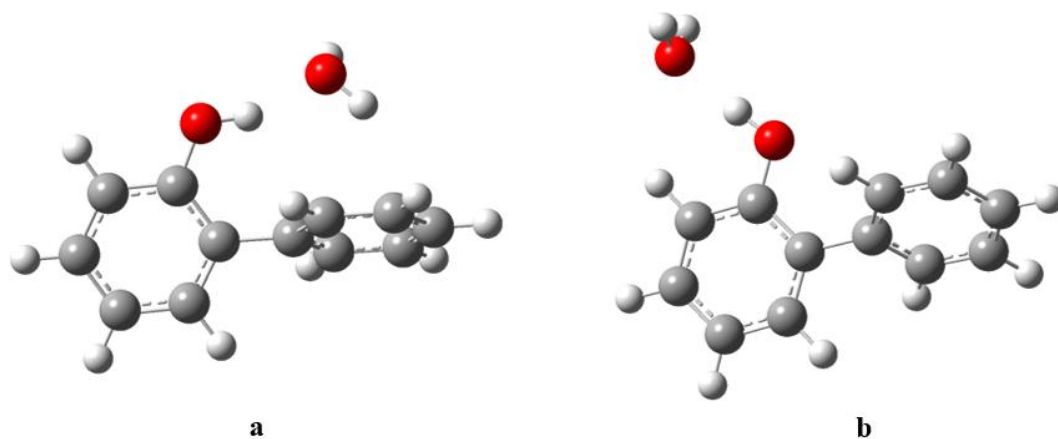

**Figure S14.** Structures of *syn* **1-W** and *anti* **1-W** conformers. Similar structures were found for **2** and **5**.

#### 4.4 XYZ coordinates of all stationary points

##### 1. 2-phenylphenol (**1**), enol form (S0)

|   |               |               |               |
|---|---------------|---------------|---------------|
| C | -2.7287470000 | -1.4704020000 | 0.4225530000  |
| C | -1.3403110000 | -1.4010050000 | 0.4027910000  |
| C | -0.6691170000 | -0.2188300000 | 0.0724630000  |
| C | -1.4407460000 | 0.9048630000  | -0.2603250000 |
| C | -2.8328590000 | 0.8461210000  | -0.2423580000 |
| C | -3.4743980000 | -0.3370550000 | 0.1016520000  |
| H | -3.2237020000 | -2.3983720000 | 0.6906400000  |
| H | -0.7512050000 | -2.2765900000 | 0.6610250000  |
| H | -3.3965380000 | 1.7345300000  | -0.5095470000 |
| H | -4.5596150000 | -0.3735460000 | 0.1145470000  |
| C | 0.8188490000  | -0.1678810000 | 0.0555910000  |
| C | 1.5187720000  | 0.7537610000  | 0.8450020000  |
| C | 1.5495020000  | -1.0545930000 | -0.7441950000 |
| C | 2.9114360000  | 0.7901020000  | 0.8311510000  |
| H | 0.9712650000  | 1.4301590000  | 1.4964590000  |
| C | 2.9405590000  | -1.0224010000 | -0.7538600000 |
| H | 1.0199900000  | -1.7699420000 | -1.3668550000 |
| C | 3.6260830000  | -0.0972960000 | 0.0312480000  |
| H | 3.4364620000  | 1.5080580000  | 1.4540870000  |
| H | 3.4904370000  | -1.7178880000 | -1.3810000000 |
| H | 4.7114960000  | -0.0704540000 | 0.0208350000  |
| O | -0.8822550000 | 2.0957120000  | -0.6350900000 |
| H | 0.0853070000  | 2.0160430000  | -0.6697500000 |

##### 2. 2-phenylphenol (**1**), enol form (S1)

|   |              |               |              |
|---|--------------|---------------|--------------|
| C | 3.6309310000 | -0.0154460000 | 0.0349840000 |
| C | 2.8542220000 | 1.0750540000  | 0.4528670000 |
| C | 1.4770680000 | 1.0019320000  | 0.4854950000 |

|   |               |               |               |
|---|---------------|---------------|---------------|
| C | 0.7813140000  | -0.1987100000 | 0.0476650000  |
| C | 1.6188390000  | -1.3388040000 | -0.2614790000 |
| C | 2.9868300000  | -1.2298020000 | -0.2895640000 |
| C | -0.6178860000 | -0.2759330000 | -0.0532710000 |
| C | -1.3638970000 | -1.5128580000 | -0.0082130000 |
| C | -2.7217850000 | -1.5056100000 | 0.1956890000  |
| C | -3.4620780000 | -0.2940600000 | 0.2743110000  |
| C | -2.8162230000 | 0.9214130000  | 0.0552660000  |
| C | -1.4490160000 | 0.9327810000  | -0.1791360000 |
| O | -0.9119990000 | 2.0725050000  | -0.6332480000 |
| H | -3.2462430000 | -2.4497090000 | 0.3098560000  |
| H | -0.8323310000 | -2.4561230000 | -0.0227130000 |
| H | -3.3670580000 | 1.8526240000  | -0.0320690000 |
| H | -4.5350070000 | -0.3221910000 | 0.4323740000  |
| H | 0.9251540000  | 1.8032170000  | 0.9681380000  |
| H | 1.1578470000  | -2.2773850000 | -0.5466540000 |
| H | 3.3441060000  | 1.9816120000  | 0.7981040000  |
| H | 3.5832400000  | -2.0937750000 | -0.5692710000 |
| H | 4.7137180000  | 0.0556570000  | 0.0112930000  |
| H | 0.0426530000  | 1.9662900000  | -0.8107590000 |

### 3. 2-phenylphenol (1), keto form (S0)

|   |               |               |               |
|---|---------------|---------------|---------------|
| C | 3.6553760000  | -0.1053450000 | 0.0002310000  |
| C | 2.9857590000  | 1.0590670000  | 0.0007670000  |
| C | 1.5019910000  | 1.1242760000  | 0.0004610000  |
| C | 0.7499880000  | -0.1735810000 | -0.0000360000 |
| C | 1.5455930000  | -1.3707790000 | -0.0008820000 |
| C | 2.9053480000  | -1.3355650000 | -0.0007590000 |
| C | -0.6518580000 | -0.2114900000 | 0.0001780000  |
| C | -1.3679190000 | -1.4651160000 | 0.0007170000  |
| C | -2.7242720000 | -1.5353350000 | 0.0006360000  |
| C | -3.5004110000 | -0.3319210000 | -0.0000830000 |
| C | -2.8964770000 | 0.8829500000  | -0.0004940000 |
| C | -1.4503380000 | 1.0267650000  | -0.0001930000 |
| O | -0.9387910000 | 2.1714480000  | -0.0005050000 |
| H | -3.2240320000 | -2.4983910000 | 0.0011890000  |
| H | -0.8131170000 | -2.3946580000 | 0.0014750000  |
| H | -3.4695570000 | 1.8054640000  | -0.0009780000 |
| H | -4.5851540000 | -0.4008910000 | -0.0002440000 |
| H | 1.1578270000  | 1.7399890000  | 0.8453920000  |
| H | 1.0662840000  | -2.3398750000 | -0.0018410000 |
| H | 3.5126870000  | 2.0090540000  | 0.0013720000  |
| H | 3.4508090000  | -2.2749670000 | -0.0015080000 |
| H | 4.7396290000  | -0.1411220000 | 0.0004260000  |
| H | 1.1582790000  | 1.7402520000  | -0.8445030000 |

### 4. 2-phenylphenol (1), keto form (S1)

|   |              |               |               |
|---|--------------|---------------|---------------|
| C | 3.6114640000 | -0.0713910000 | -0.0135030000 |
| C | 2.9677950000 | 0.1841950000  | 1.1468620000  |
| C | 1.4766520000 | 0.1763630000  | 1.2492080000  |



|   |               |               |               |
|---|---------------|---------------|---------------|
| C | 0.7827510000  | -0.2013530000 | -0.0280340000 |
| C | 1.5045070000  | -0.4507680000 | -1.1872760000 |
| C | 2.8887890000  | -0.3863370000 | -1.2112900000 |
| C | -0.6796250000 | -0.2565960000 | -0.0043790000 |
| C | -1.3878620000 | -1.4415480000 | 0.2030090000  |
| C | -2.7721260000 | -1.4465670000 | 0.2201810000  |
| C | -3.5090770000 | -0.2432370000 | 0.0450640000  |
| C | -2.8612200000 | 0.9403980000  | -0.1430540000 |
| C | -1.4141070000 | 0.9932130000  | -0.1692030000 |
| O | -0.7987130000 | 2.0780660000  | -0.3185540000 |
| H | -3.3059960000 | -2.3794970000 | 0.3649300000  |
| H | -0.8411550000 | -2.3696450000 | 0.3384740000  |
| H | -3.3972410000 | 1.8734090000  | -0.2823930000 |
| H | -4.5935900000 | -0.2793980000 | 0.0622390000  |
| H | 1.1498360000  | -0.4842700000 | 2.0720030000  |
| H | 0.9644050000  | -0.7035130000 | -2.0957840000 |
| H | 3.5275570000  | 0.4071720000  | 2.0500980000  |
| H | 3.4277480000  | -0.5911640000 | -2.1285270000 |
| H | 4.6969020000  | -0.0481280000 | -0.0475420000 |
| H | 1.1135930000  | 1.1722840000  | 1.5694260000  |

#### 5. 2-phenylphenol (1), TS (S1)

-973.56 cm<sup>-1</sup>

|   |               |               |               |
|---|---------------|---------------|---------------|
| C | -3.5591520000 | -0.0141930000 | -0.1187200000 |
| C | -2.8207200000 | -1.0685870000 | 0.3664250000  |
| C | -1.4157250000 | -0.9717590000 | 0.5603690000  |
| C | -0.7629130000 | 0.3022020000  | 0.1825950000  |
| C | -1.5856090000 | 1.4030200000  | -0.1964760000 |
| C | -2.9408000000 | 1.2520190000  | -0.3614620000 |
| C | 0.6450850000  | 0.3361650000  | 0.0682320000  |
| C | 1.4645790000  | 1.4968280000  | 0.1611070000  |
| C | 2.8341700000  | 1.3961390000  | 0.1596270000  |
| C | 3.4871640000  | 0.1343210000  | 0.0498490000  |
| C | 2.7471470000  | -1.0176550000 | -0.0935350000 |
| C | 1.3439800000  | -0.9317040000 | -0.1728600000 |
| O | 0.6506860000  | -1.9750640000 | -0.5545490000 |
| H | 3.4366700000  | 2.2924260000  | 0.2675900000  |
| H | 0.9964490000  | 2.4659290000  | 0.2959640000  |
| H | 3.2131940000  | -1.9878190000 | -0.2312190000 |
| H | 4.5711450000  | 0.0893470000  | 0.0590380000  |
| H | -1.0139630000 | -1.5009860000 | 1.4338100000  |
| H | -1.1202190000 | 2.3526870000  | -0.4442910000 |
| H | -3.3262180000 | -1.9875220000 | 0.6541400000  |
| H | -3.5429880000 | 2.0914130000  | -0.6922920000 |
| H | -4.6301800000 | -0.1203260000 | -0.2651210000 |
| H | -0.4126260000 | -1.7954060000 | -0.2721300000 |

#### 6. 4-methoxy-2-phenylphenol (2), enol form (S0)

|   |               |               |              |
|---|---------------|---------------|--------------|
| C | -2.3250060000 | -0.4577950000 | 0.0878350000 |
| C | -0.9657260000 | -0.7683710000 | 0.1225730000 |

|   |               |               |               |
|---|---------------|---------------|---------------|
| C | 0.0112700000  | 0.2134880000  | -0.0269930000 |
| C | -0.4002700000 | 1.5404870000  | -0.2355120000 |
| C | -1.7514630000 | 1.8524970000  | -0.2719560000 |
| C | -2.7201390000 | 0.8641050000  | -0.1072130000 |
| H | -0.6717210000 | -1.8007050000 | 0.2865840000  |
| H | -2.0481000000 | 2.8829470000  | -0.4406180000 |
| H | -3.7664150000 | 1.1425120000  | -0.1396760000 |
| C | 1.4544960000  | -0.1505940000 | 0.0155080000  |
| C | 2.3225970000  | 0.4557000000  | 0.9323080000  |
| C | 1.9682010000  | -1.1184300000 | -0.8553460000 |
| C | 3.6702080000  | 0.1050460000  | 0.9742860000  |
| H | 1.9360050000  | 1.1881580000  | 1.6362170000  |
| C | 3.3132660000  | -1.4717580000 | -0.8106410000 |
| H | 1.3069390000  | -1.5913710000 | -1.5756060000 |
| C | 4.1692130000  | -0.8588850000 | 0.1024950000  |
| H | 4.3271830000  | 0.5811060000  | 1.6960290000  |
| H | 3.6948700000  | -2.2241270000 | -1.4944870000 |
| H | 5.2192660000  | -1.1332620000 | 0.1353170000  |
| O | 0.4864500000  | 2.5705730000  | -0.4283740000 |
| H | 1.3939530000  | 2.2269130000  | -0.4621230000 |
| O | -3.1847920000 | -1.5071780000 | 0.2569970000  |
| C | -4.5778460000 | -1.2397670000 | 0.2408390000  |
| H | -4.8904300000 | -0.8247550000 | -0.7237860000 |
| H | -5.0699490000 | -2.1989050000 | 0.3994190000  |
| H | -4.8576680000 | -0.5500010000 | 1.0446460000  |

#### 7. 4-methoxy-2-phenylphenol (**2**), enol form (S1)

|   |               |               |               |
|---|---------------|---------------|---------------|
| C | -2.3341100000 | -0.4426040000 | 0.0286450000  |
| C | -0.9886580000 | -0.8219390000 | -0.0491450000 |
| C | 0.0492030000  | 0.1426840000  | -0.0412310000 |
| C | -0.4070860000 | 1.5274410000  | -0.1770410000 |
| C | -1.7532560000 | 1.8961820000  | -0.0773540000 |
| C | -2.7397650000 | 0.9229320000  | 0.0514250000  |
| H | -0.7629680000 | -1.8795110000 | 0.0082790000  |
| H | -2.0085840000 | 2.9449050000  | -0.1863760000 |
| H | -3.7834030000 | 1.2033430000  | 0.0909300000  |
| C | 1.4366520000  | -0.1729110000 | 0.0336140000  |
| C | 2.4137880000  | 0.7289120000  | 0.5841140000  |
| C | 1.9275670000  | -1.4448290000 | -0.4100740000 |
| C | 3.7632910000  | 0.4075790000  | 0.5858370000  |
| H | 2.0976100000  | 1.6149710000  | 1.1283890000  |
| C | 3.2731510000  | -1.7396760000 | -0.3971970000 |
| H | 1.2302140000  | -2.1699340000 | -0.8168220000 |
| C | 4.2190160000  | -0.8117520000 | 0.0805090000  |
| H | 4.4697980000  | 1.1086550000  | 1.0229240000  |
| H | 3.6079400000  | -2.7034840000 | -0.7719350000 |
| H | 5.2768160000  | -1.0543940000 | 0.0866710000  |
| O | 0.4455090000  | 2.4907750000  | -0.5226000000 |
| H | 1.3538530000  | 2.1365170000  | -0.6125800000 |
| O | -3.2094230000 | -1.4545390000 | 0.0957260000  |
| C | -4.6086530000 | -1.1962780000 | 0.2323500000  |

|   |               |               |               |
|---|---------------|---------------|---------------|
| H | -4.9868480000 | -0.6524370000 | -0.6368000000 |
| H | -5.0797320000 | -2.1760800000 | 0.2865210000  |
| H | -4.8102290000 | -0.6368900000 | 1.1490700000  |

**8. 4-methoxy-2-phenylphenol (2), keto form (S0)**

|   |               |               |               |
|---|---------------|---------------|---------------|
| C | 2.3242590000  | -0.4506070000 | -0.0004260000 |
| C | 1.0042030000  | -0.7732530000 | 0.0042570000  |
| C | -0.0400350000 | 0.2200020000  | 0.0034090000  |
| C | 0.3622370000  | 1.6340600000  | 0.0014860000  |
| C | 1.7877880000  | 1.9082750000  | -0.0068020000 |
| C | 2.7231960000  | 0.9263560000  | -0.0074370000 |
| H | 0.7617760000  | -1.8277850000 | 0.0086520000  |
| H | 2.0782240000  | 2.9540450000  | -0.0108350000 |
| H | 3.7742100000  | 1.1918610000  | -0.0126680000 |
| C | -1.3942770000 | -0.1453750000 | 0.0028780000  |
| C | -2.4881920000 | 0.8823600000  | 0.0029890000  |
| C | -1.8094850000 | -1.5210740000 | 0.0033480000  |
| C | -3.8894090000 | 0.3876880000  | -0.0051640000 |
| H | -2.3333580000 | 1.5800800000  | -0.8342290000 |
| C | -3.1202420000 | -1.8827280000 | -0.0009200000 |
| H | -1.0689850000 | -2.3089170000 | 0.0061860000  |
| C | -4.1927950000 | -0.9204500000 | -0.0066650000 |
| H | -4.6702800000 | 1.1430230000  | -0.0096190000 |
| H | -3.3706940000 | -2.9397880000 | -0.0005240000 |
| H | -5.2208340000 | -1.2671570000 | -0.0124110000 |
| O | -0.4532160000 | 2.5868780000  | 0.0077500000  |
| H | -2.3422190000 | 1.5667380000  | 0.8532260000  |
| O | 3.2248630000  | -1.4824100000 | 0.0009180000  |
| C | 4.6143420000  | -1.1859490000 | -0.0002480000 |
| H | 4.9037770000  | -0.6227340000 | 0.8934530000  |
| H | 5.1215940000  | -2.1504710000 | 0.0038850000  |
| H | 4.9040540000  | -0.6304600000 | -0.8986740000 |

**9. 4-methoxy-2-phenylphenol (2), keto form (S1)**

|   |               |               |               |
|---|---------------|---------------|---------------|
| C | 2.3373870000  | -0.4651440000 | -0.0064750000 |
| C | 0.9777790000  | -0.8027100000 | 0.0098180000  |
| C | 0.0030540000  | 0.1728520000  | 0.0611350000  |
| C | 0.3828380000  | 1.5778050000  | 0.0678890000  |
| C | 1.7961750000  | 1.8803260000  | 0.0570800000  |
| C | 2.7417410000  | 0.8974790000  | 0.0210360000  |
| H | 0.7095390000  | -1.8542500000 | -0.0103990000 |
| H | 2.0819920000  | 2.9266890000  | 0.0813740000  |
| H | 3.7926430000  | 1.1580670000  | 0.0140000000  |
| C | -1.4289390000 | -0.1501880000 | 0.0602130000  |
| C | -2.1285940000 | -0.1651520000 | -1.2674090000 |
| C | -2.1222200000 | -0.3930510000 | 1.2353210000  |
| C | -3.5800350000 | -0.5135470000 | -1.1830010000 |
| H | -1.6081690000 | -0.8462570000 | -1.9643160000 |
| C | -3.4802600000 | -0.6801550000 | 1.2366220000  |
| H | -1.5823610000 | -0.3568980000 | 2.1779190000  |

|   |               |               |               |
|---|---------------|---------------|---------------|
| C | -4.1974150000 | -0.7437220000 | -0.0024910000 |
| H | -4.1332620000 | -0.5754680000 | -2.1151410000 |
| H | -3.9959090000 | -0.8723000000 | 2.1697780000  |
| H | -5.2557470000 | -0.9877650000 | 0.0164200000  |
| O | -0.4857040000 | 2.4885730000  | 0.0707550000  |
| H | -2.0042470000 | 0.8248480000  | -1.7476830000 |
| O | 3.1967450000  | -1.4918130000 | -0.0439470000 |
| C | 4.6043320000  | -1.2439330000 | -0.0621210000 |
| H | 4.9160030000  | -0.7167520000 | 0.8432390000  |
| H | 5.0713460000  | -2.2264680000 | -0.0944950000 |
| H | 4.8847810000  | -0.6727020000 | -0.9508750000 |

**10.** 4-methoxy-2-phenylphenol (**2**), TS (S1)

-1110.35 cm<sup>-1</sup>

|   |               |               |               |
|---|---------------|---------------|---------------|
| C | -2.3706730000 | -0.4107300000 | 0.0464740000  |
| C | -1.0521920000 | -0.8560180000 | 0.1104100000  |
| C | 0.0234510000  | 0.0418700000  | 0.0566910000  |
| C | -0.3143570000 | 1.4505330000  | -0.1731520000 |
| C | -1.6556710000 | 1.8871450000  | -0.1571970000 |
| C | -2.6835010000 | 0.9758490000  | -0.0716210000 |
| H | -0.8798680000 | -1.9163610000 | 0.2580440000  |
| H | -1.8525630000 | 2.9454370000  | -0.2914080000 |
| H | -3.7106480000 | 1.3133710000  | -0.1117020000 |
| C | 1.4034900000  | -0.2896660000 | 0.1618870000  |
| C | 2.3408870000  | 0.7517540000  | 0.6091390000  |
| C | 1.9256050000  | -1.5304670000 | -0.2918860000 |
| C | 3.7359020000  | 0.4873150000  | 0.4610200000  |
| H | 2.0599450000  | 1.3378300000  | 1.4931220000  |
| C | 3.2786790000  | -1.7298190000 | -0.4190450000 |
| H | 1.2377550000  | -2.3088880000 | -0.6114470000 |
| C | 4.1971260000  | -0.6905090000 | -0.0703400000 |
| H | 4.4467530000  | 1.2328250000  | 0.8104250000  |
| H | 3.6539370000  | -2.6742170000 | -0.8009700000 |
| H | 5.2638770000  | -0.8579310000 | -0.1885480000 |
| O | 0.6295140000  | 2.2932410000  | -0.5002830000 |
| H | 1.6071840000  | 1.8286670000  | -0.2022970000 |
| O | -3.3135770000 | -1.3625110000 | 0.1281350000  |
| C | -4.6973980000 | -1.0073060000 | 0.1167110000  |
| H | -4.9639070000 | -0.5148430000 | -0.8221280000 |
| H | -5.2383410000 | -1.9479620000 | 0.2033160000  |
| H | -4.9397090000 | -0.3634790000 | 0.9662220000  |

**11.** 4-cyano-2-phenylphenol (**5**), enol form (S0)

|   |               |               |               |
|---|---------------|---------------|---------------|
| C | -2.5169630000 | -0.4064250000 | 0.0802860000  |
| C | -1.1611330000 | -0.7457080000 | 0.1146990000  |
| C | -0.1726090000 | 0.2238530000  | -0.0192910000 |
| C | -0.5745720000 | 1.5583270000  | -0.2086490000 |
| C | -1.9268780000 | 1.9040870000  | -0.2414120000 |
| C | -2.8970600000 | 0.9306150000  | -0.0951880000 |
| H | -0.8695690000 | -1.7808150000 | 0.2602060000  |

|   |               |               |               |
|---|---------------|---------------|---------------|
| H | -2.1979200000 | 2.9434430000  | -0.3917920000 |
| H | -3.9474630000 | 1.1995970000  | -0.1205150000 |
| C | 1.2683590000  | -0.1486530000 | 0.0146060000  |
| C | 2.1315200000  | 0.4102360000  | 0.9651190000  |
| C | 1.7808880000  | -1.0750050000 | -0.9003400000 |
| C | 3.4773680000  | 0.0523790000  | 0.9965290000  |
| H | 1.7441590000  | 1.1079800000  | 1.7031500000  |
| C | 3.1240950000  | -1.4357030000 | -0.8646380000 |
| H | 1.1223300000  | -1.5096570000 | -1.6467420000 |
| C | 3.9766530000  | -0.8703890000 | 0.0815910000  |
| H | 4.1323250000  | 0.4904140000  | 1.7434960000  |
| H | 3.5066300000  | -2.1561390000 | -1.5813140000 |
| H | 5.0253590000  | -1.1503140000 | 0.1067290000  |
| O | 0.3137410000  | 2.5664200000  | -0.3845030000 |
| H | 1.2237360000  | 2.2230360000  | -0.3902620000 |
| C | -3.5123660000 | -1.4248450000 | 0.2308770000  |

### 12. 4-cyano-2-phenylphenol (**5**), enol form (S1)

|   |               |               |               |
|---|---------------|---------------|---------------|
| C | -2.4932800000 | -0.3853780000 | 0.0630830000  |
| C | -1.1983330000 | -0.7853690000 | -0.1830990000 |
| C | -0.1234630000 | 0.1793140000  | -0.1377420000 |
| C | -0.5648730000 | 1.5835140000  | -0.1864120000 |
| C | -1.8694360000 | 1.9602390000  | 0.0911990000  |
| C | -2.8465430000 | 0.9833590000  | 0.2617830000  |
| H | -0.9811100000 | -1.8379040000 | -0.3059590000 |
| H | -2.1246900000 | 3.0145730000  | 0.0730640000  |
| H | -3.8774730000 | 1.2546460000  | 0.4558780000  |
| C | 1.2275900000  | -0.1732390000 | 0.0010700000  |
| C | 2.2305790000  | 0.7479930000  | 0.5061100000  |
| C | 1.6938180000  | -1.5037810000 | -0.3295740000 |
| C | 3.5627900000  | 0.3995520000  | 0.5362610000  |
| H | 1.9251810000  | 1.6806150000  | 0.9695970000  |
| C | 3.0296260000  | -1.8173790000 | -0.2936290000 |
| H | 0.9879350000  | -2.2472310000 | -0.6798800000 |
| C | 3.9899290000  | -0.8691580000 | 0.1141840000  |
| H | 4.2870590000  | 1.1064770000  | 0.9306390000  |
| H | 3.3504230000  | -2.8122900000 | -0.5881740000 |
| H | 5.0425600000  | -1.1320050000 | 0.1420970000  |
| O | 0.2761280000  | 2.5386290000  | -0.5955310000 |
| H | 1.1423970000  | 2.1684470000  | -0.8473480000 |
| C | -3.5294400000 | -1.3754150000 | 0.1227500000  |
| N | -4.3735860000 | -2.1671240000 | 0.1740630000  |

### 13. 4-cyano-2-phenylphenol (**5**), keto form (S0)

|   |              |               |               |
|---|--------------|---------------|---------------|
| C | 2.5219330000 | -0.3808610000 | 0.0007690000  |
| C | 1.1954100000 | -0.7245840000 | 0.0028510000  |
| C | 0.1534510000 | 0.2491240000  | 0.0030330000  |
| C | 0.5384320000 | 1.6694370000  | 0.0051240000  |
| C | 1.9615390000 | 1.9689230000  | -0.0025570000 |
| C | 2.9077650000 | 1.0021030000  | -0.0031150000 |

|   |               |               |               |
|---|---------------|---------------|---------------|
| H | 0.9504610000  | -1.7781050000 | 0.0038910000  |
| H | 2.2310750000  | 3.0200020000  | -0.0065220000 |
| H | 3.9627240000  | 1.2576690000  | -0.0070180000 |
| C | -1.2038110000 | -0.1499580000 | 0.0016730000  |
| C | -2.3056420000 | 0.8601300000  | 0.0030290000  |
| C | -1.5966410000 | -1.5214470000 | -0.0006540000 |
| C | -3.6998910000 | 0.3611840000  | 0.0000070000  |
| H | -2.1571010000 | 1.5573660000  | -0.8361830000 |
| C | -2.9102130000 | -1.8940140000 | -0.0026000000 |
| H | -0.8538390000 | -2.3070410000 | -0.0012590000 |
| C | -3.9920780000 | -0.9520720000 | -0.0025180000 |
| H | -4.4847180000 | 1.1117970000  | 0.0002850000  |
| H | -3.1463750000 | -2.9542920000 | -0.0044450000 |
| H | -5.0152090000 | -1.3112990000 | -0.0044830000 |
| O | -0.2920630000 | 2.6036640000  | -0.0027810000 |
| H | -2.1593880000 | 1.5511280000  | 0.8478930000  |
| C | 3.5253030000  | -1.3986380000 | 0.0002040000  |
| N | 4.3479340000  | -2.2160710000 | -0.0001990000 |

**14.** 4-cyano-2-phenylphenol (**5**), keto form (S1)

|   |               |               |               |
|---|---------------|---------------|---------------|
| C | 2.5211570000  | -0.4077280000 | -0.0536360000 |
| C | 1.1781770000  | -0.7753770000 | -0.0753020000 |
| C | 0.1834570000  | 0.1868280000  | 0.0587020000  |
| C | 0.5604280000  | 1.5954930000  | 0.1753880000  |
| C | 1.9707550000  | 1.9279970000  | 0.1827680000  |
| C | 2.9165580000  | 0.9578120000  | 0.0756730000  |
| H | 0.9058720000  | -1.8200520000 | -0.1792340000 |
| H | 2.2383230000  | 2.9734240000  | 0.2897740000  |
| H | 3.9724940000  | 1.2037810000  | 0.0890010000  |
| C | -1.2409160000 | -0.1464290000 | 0.0523000000  |
| C | -2.0063050000 | 0.1638740000  | -1.2011440000 |
| C | -1.8711620000 | -0.6859560000 | 1.1619770000  |
| C | -3.4336390000 | -0.2664550000 | -1.1564890000 |
| H | -1.4984910000 | -0.2652480000 | -2.0828570000 |
| C | -3.2238050000 | -1.0015370000 | 1.1453620000  |
| H | -1.2895360000 | -0.8702540000 | 2.0609720000  |
| C | -3.9926170000 | -0.7954540000 | -0.0429910000 |
| H | -4.0208180000 | -0.1398490000 | -2.0607830000 |
| H | -3.6908700000 | -1.4322230000 | 2.0229190000  |
| H | -5.0392520000 | -1.0852690000 | -0.0474580000 |
| O | -0.3229260000 | 2.4776250000  | 0.2557410000  |
| H | -1.9424900000 | 1.2555940000  | -1.3826330000 |
| C | 3.5278770000  | -1.4184550000 | -0.1597590000 |
| N | 4.3440530000  | -2.2355120000 | -0.2475320000 |

**15.** 4-cyano-2-phenylphenol (**5**), TS (S1)

-1112.74 cm<sup>-1</sup>

|   |               |               |              |
|---|---------------|---------------|--------------|
| C | -2.5510000000 | -0.3109250000 | 0.0350160000 |
| C | -1.2645970000 | -0.8059470000 | 0.0478320000 |
| C | -0.1522370000 | 0.0788220000  | 0.0285360000 |

|   |               |               |               |
|---|---------------|---------------|---------------|
| C | -0.4576280000 | 1.5027240000  | -0.1682780000 |
| C | -1.7789960000 | 1.9829720000  | -0.0916260000 |
| C | -2.8228170000 | 1.0934220000  | -0.0122870000 |
| H | -1.1019260000 | -1.8741000000 | 0.1298880000  |
| H | -1.9480630000 | 3.0502240000  | -0.1843250000 |
| H | -3.8496320000 | 1.4401960000  | -0.0105980000 |
| C | 1.1977330000  | -0.2948960000 | 0.1743970000  |
| C | 2.1768580000  | 0.7340600000  | 0.5952050000  |
| C | 1.6846460000  | -1.5799130000 | -0.2152990000 |
| C | 3.5535790000  | 0.4457390000  | 0.4026220000  |
| H | 1.9297390000  | 1.3237700000  | 1.4867390000  |
| C | 3.0279520000  | -1.8036820000 | -0.3703370000 |
| H | 0.9788560000  | -2.3593010000 | -0.4861040000 |
| C | 3.9723500000  | -0.7633500000 | -0.1041210000 |
| H | 4.2914510000  | 1.1804820000  | 0.7147950000  |
| H | 3.3790910000  | -2.7711270000 | -0.7142750000 |
| H | 5.0314420000  | -0.9582790000 | -0.2437470000 |
| O | 0.5095430000  | 2.3129060000  | -0.4996450000 |
| H | 1.4805610000  | 1.8239030000  | -0.2071690000 |
| C | -3.6540260000 | -1.2243690000 | 0.0960360000  |
| N | -4.5512520000 | -1.9552790000 | 0.1436810000  |

16. 2-phenylphenol + 1 explicit water (**1-W**), *syn* conformer S<sub>0</sub> (B3LYP/6-31+G(d,p)/scrf=acetonitrile)

|   |               |               |               |
|---|---------------|---------------|---------------|
| C | -3.0679010000 | -1.5042860000 | -0.0475110000 |
| C | -1.6741780000 | -1.5645950000 | -0.0325520000 |
| C | -0.8783660000 | -0.4071480000 | 0.0470660000  |
| C | -1.5322210000 | 0.8458110000  | 0.0792340000  |
| C | -2.9336700000 | 0.9079890000  | 0.0746680000  |
| C | -3.6976510000 | -0.2563500000 | 0.0164130000  |
| H | -3.6527130000 | -2.4174380000 | -0.0987350000 |
| H | -1.1770330000 | -2.5303760000 | -0.0598730000 |
| H | -3.4058150000 | 1.8854320000  | 0.1016860000  |
| H | -4.7816600000 | -0.1871400000 | 0.0119880000  |
| C | 0.6063260000  | -0.5373960000 | 0.1025720000  |
| C | 1.3414490000  | -0.0073270000 | 1.1786000000  |
| C | 1.3003330000  | -1.2302800000 | -0.9049420000 |
| C | 2.7300610000  | -0.1568530000 | 1.2386680000  |
| H | 0.8225300000  | 0.5172650000  | 1.9757240000  |
| C | 2.6885110000  | -1.3822020000 | -0.8453670000 |
| H | 0.7482860000  | -1.6416670000 | -1.7451770000 |
| C | 3.4094370000  | -0.8424040000 | 0.2247650000  |
| H | 3.2794150000  | 0.2558460000  | 2.0799320000  |
| H | 3.2061570000  | -1.9159560000 | -1.6371360000 |
| H | 4.4882810000  | -0.9571240000 | 0.2712680000  |
| O | -0.8780580000 | 2.0443920000  | 0.1205850000  |
| H | 0.0597800000  | 2.0023330000  | -0.1689920000 |
| O | 1.6932730000  | 2.5912780000  | -0.7722840000 |
| H | 1.7528430000  | 2.7737940000  | -1.7204200000 |
| H | 2.3854370000  | 1.9399110000  | -0.5863510000 |

17. 2-phenylphenol + 1 explicit water (**1-W**), *anti* conformer S<sub>0</sub> (B3LYP/6-31+G(d,p)/scrf=acetonitrile)

|   |               |               |               |
|---|---------------|---------------|---------------|
| C | 1.6343740000  | -2.6928280000 | -0.2415950000 |
| C | 0.3590620000  | -2.1259860000 | -0.2016780000 |
| C | 0.1587620000  | -0.7391590000 | -0.0820860000 |
| C | 1.3055020000  | 0.0855890000  | 0.0041200000  |
| C | 2.5896640000  | -0.4795730000 | -0.0355970000 |
| C | 2.7537890000  | -1.8598250000 | -0.1589040000 |
| H | 1.7501620000  | -3.7674580000 | -0.3431700000 |
| H | -0.5127860000 | -2.7689360000 | -0.2828970000 |
| H | 3.4541720000  | 0.1736670000  | 0.0391100000  |
| H | 3.7555740000  | -2.2787810000 | -0.1901310000 |
| C | -1.2264280000 | -0.1927340000 | -0.0351340000 |
| C | -1.6184950000 | 0.9049790000  | -0.8238210000 |
| C | -2.1970660000 | -0.8010450000 | 0.7824210000  |
| C | -2.9347680000 | 1.3712170000  | -0.8000070000 |
| H | -0.8887520000 | 1.3895390000  | -1.4631830000 |
| C | -3.5139060000 | -0.3334530000 | 0.8090320000  |
| H | -1.9148390000 | -1.6393900000 | 1.4129810000  |
| C | -3.8894180000 | 0.7554340000  | 0.0168340000  |
| H | -3.2156800000 | 2.2156040000  | -1.4234450000 |
| H | -4.2429340000 | -0.8170780000 | 1.4532250000  |
| H | -4.9120380000 | 1.1209850000  | 0.0362490000  |
| O | 1.1320530000  | 1.4305320000  | 0.1493010000  |
| H | 1.9962770000  | 1.8944610000  | 0.2270010000  |
| O | 3.4930870000  | 2.8538750000  | 0.3770350000  |
| H | 3.5955930000  | 3.3118820000  | 1.2233520000  |
| H | 3.6076990000  | 3.5345450000  | -0.3012930000 |

18. 4-methoxy-2-phenylphenol + 1 explicit water (**2-W**), *syn* conformer S<sub>0</sub> (B3LYP/6-31+G(d,p)/scrf=acetonitrile)

|   |               |               |               |
|---|---------------|---------------|---------------|
| C | -2.6466970000 | -0.4011310000 | -0.0015590000 |
| C | -1.3205410000 | -0.8470030000 | 0.0078170000  |
| C | -0.2395490000 | 0.0432050000  | 0.0802140000  |
| C | -0.5126070000 | 1.4312310000  | 0.1114880000  |
| C | -1.8385780000 | 1.8706300000  | 0.1093760000  |
| C | -2.9084240000 | 0.9722760000  | 0.0598070000  |
| H | -1.1325680000 | -1.9161360000 | -0.0140430000 |
| H | -2.0289550000 | 2.9393280000  | 0.1331260000  |
| H | -3.9212230000 | 1.3566060000  | 0.0606180000  |
| C | 1.1477830000  | -0.5017280000 | 0.1266370000  |
| C | 2.0265200000  | -0.1587890000 | 1.1703150000  |
| C | 1.5960930000  | -1.4000800000 | -0.8576570000 |
| C | 3.3180380000  | -0.6906930000 | 1.2212760000  |
| H | 1.6948900000  | 0.5217060000  | 1.9489800000  |
| C | 2.8870080000  | -1.9332480000 | -0.8073130000 |
| H | 0.9322390000  | -1.6707750000 | -1.6736850000 |
| C | 3.7547460000  | -1.5775400000 | 0.2303850000  |
| H | 3.9801310000  | -0.4169010000 | 2.0376830000  |
| H | 3.2159100000  | -2.6203910000 | -1.5815270000 |



|   |               |               |               |
|---|---------------|---------------|---------------|
| H | 4.7590580000  | -1.9887350000 | 0.2693130000  |
| O | 0.4568210000  | 2.4008280000  | 0.1569130000  |
| H | 1.3239140000  | 2.1084470000  | -0.1988830000 |
| O | 3.0176160000  | 2.1898230000  | -0.9099400000 |
| H | 3.0596880000  | 2.3063920000  | -1.8693740000 |
| H | 3.5048010000  | 1.3737450000  | -0.7241290000 |
| O | -3.6102150000 | -1.3792370000 | -0.0629600000 |
| C | -4.9798150000 | -0.9749650000 | -0.0624700000 |
| H | -5.5620530000 | -1.8952680000 | -0.1141920000 |
| H | -5.2337660000 | -0.4336780000 | 0.8564410000  |
| H | -5.2097090000 | -0.3486460000 | -0.9323280000 |

**19.** 4-methoxy-2-phenylphenol + 1 explicit water (**2-W**), *anti* conformer S<sub>0</sub> (B3LYP/6-31+G(d,p)/scrf=acetonitrile)

|   |               |               |               |
|---|---------------|---------------|---------------|
| C | -2.1955290000 | -1.0890580000 | 0.0764960000  |
| C | -0.8078960000 | -1.2743200000 | 0.0739610000  |
| C | 0.0871430000  | -0.1969610000 | 0.0222340000  |
| C | -0.4475910000 | 1.1130510000  | -0.0344410000 |
| C | -1.8332990000 | 1.2955560000  | -0.0327060000 |
| C | -2.7132450000 | 0.2082720000  | 0.0242570000  |
| H | -0.4238970000 | -2.2880130000 | 0.1336170000  |
| H | -2.2330730000 | 2.3040360000  | -0.0838590000 |
| H | -3.7804800000 | 0.3942440000  | 0.0270480000  |
| C | 1.5530980000  | -0.4648370000 | 0.0139620000  |
| C | 2.4368520000  | 0.2336660000  | 0.8572160000  |
| C | 2.0839830000  | -1.4647250000 | -0.8217070000 |
| C | 3.8014490000  | -0.0636520000 | 0.8685290000  |
| H | 2.0499420000  | 1.0077280000  | 1.5106510000  |
| C | 3.4499000000  | -1.7607510000 | -0.8132720000 |
| H | 1.4235420000  | -2.0054150000 | -1.4935450000 |
| C | 4.3153440000  | -1.0616780000 | 0.0332240000  |
| H | 4.4638970000  | 0.4835690000  | 1.5335170000  |
| H | 3.8364900000  | -2.5332720000 | -1.4720940000 |
| H | 5.3772990000  | -1.2896840000 | 0.0410210000  |
| O | 0.4147250000  | 2.1733070000  | -0.1150570000 |
| H | -0.0774850000 | 3.0212920000  | -0.1834470000 |
| O | -0.8623410000 | 4.6292820000  | -0.3096640000 |
| H | -0.7101590000 | 5.0904910000  | -1.1466970000 |
| H | -0.6128380000 | 5.2588580000  | 0.3816210000  |
| O | -2.9548660000 | -2.2340820000 | 0.1396800000  |
| C | -4.3754200000 | -2.0977630000 | 0.1566380000  |
| H | -4.7398290000 | -1.6122120000 | -0.7563770000 |
| H | -4.7721830000 | -3.1119190000 | 0.2105040000  |
| H | -4.7101040000 | -1.5285680000 | 1.0320170000  |

**20.** 4-cyano-2-phenylphenol + 1 explicit water (**5-W**), *syn* conformer S<sub>0</sub> (B3LYP/6-31+G(d,p)/scrf=acetonitrile)

|   |               |               |              |
|---|---------------|---------------|--------------|
| C | -2.8428020000 | -0.2886070000 | 0.0111980000 |
| C | -1.5283010000 | -0.7848300000 | 0.0185810000 |
| C | -0.4226410000 | 0.0702110000  | 0.0519450000 |

|   |               |               |               |
|---|---------------|---------------|---------------|
| C | -0.6575890000 | 1.4679240000  | 0.0485450000  |
| C | -1.9739370000 | 1.9634930000  | 0.0569300000  |
| C | -3.0596720000 | 1.1027480000  | 0.0406270000  |
| H | -1.3625300000 | -1.8572010000 | 0.0182890000  |
| H | -2.1196090000 | 3.0385200000  | 0.0593160000  |
| H | -4.0698070000 | 1.4977600000  | 0.0416060000  |
| C | 0.9519250000  | -0.5082950000 | 0.0965620000  |
| C | 1.8033820000  | -0.2547370000 | 1.1861800000  |
| C | 1.4055470000  | -1.3476900000 | -0.9348290000 |
| C | 3.0814960000  | -0.8185000000 | 1.2362000000  |
| H | 1.4621150000  | 0.3784460000  | 2.0001920000  |
| C | 2.6831190000  | -1.9120540000 | -0.8846150000 |
| H | 0.7582650000  | -1.5488450000 | -1.7835620000 |
| C | 3.5266420000  | -1.6459240000 | 0.1988130000  |
| H | 3.7256350000  | -0.6159080000 | 2.0867620000  |
| H | 3.0199550000  | -2.5542440000 | -1.6929710000 |
| H | 4.5202230000  | -2.0822100000 | 0.2376220000  |
| O | 0.3226800000  | 2.3983470000  | 0.0380990000  |
| H | 1.2233510000  | 2.0612580000  | -0.1805090000 |
| O | 2.9494790000  | 2.1470050000  | -0.6726020000 |
| H | 3.1183760000  | 2.3992910000  | -1.5912210000 |
| H | 3.4250880000  | 1.3148280000  | -0.5347880000 |
| C | -3.9498890000 | -1.1929170000 | -0.0145420000 |
| N | -4.8545710000 | -1.9284930000 | -0.0363260000 |

**21.** 4-cyano-2-phenylphenol + 1 explicit water (**5-W**), *anti* conformer S<sub>0</sub> (B3LYP/6-31+G(d,p)/scrf=acetonitrile)

|   |               |               |               |
|---|---------------|---------------|---------------|
| C | 2.3037960000  | -1.2209080000 | -0.0863570000 |
| C | 0.9022790000  | -1.3387160000 | -0.0844640000 |
| C | 0.0697410000  | -0.2177480000 | -0.0278500000 |
| C | 0.6820990000  | 1.0613880000  | 0.0323910000  |
| C | 2.0839310000  | 1.1812240000  | 0.0297270000  |
| C | 2.8927650000  | 0.0555830000  | -0.0300300000 |
| H | 0.4543570000  | -2.3250530000 | -0.1439260000 |
| H | 2.5280080000  | 2.1699710000  | 0.0824270000  |
| H | 3.9724710000  | 0.1599500000  | -0.0330370000 |
| C | -1.4093620000 | -0.3974430000 | -0.0142150000 |
| C | -2.2494380000 | 0.3364510000  | -0.8710700000 |
| C | -1.9933360000 | -1.3493080000 | 0.8407920000  |
| C | -3.6286220000 | 0.1180910000  | -0.8762800000 |
| H | -1.8194980000 | 1.0731300000  | -1.5407310000 |
| C | -3.3739880000 | -1.5654640000 | 0.8376810000  |
| H | -1.3641630000 | -1.9142110000 | 1.5226840000  |
| C | -4.1974130000 | -0.8326510000 | -0.0218720000 |
| H | -4.2592970000 | 0.6897890000  | -1.5511730000 |
| H | -3.8041500000 | -2.3019060000 | 1.5103610000  |
| H | -5.2706830000 | -0.9989610000 | -0.0253500000 |
| O | -0.1125940000 | 2.1497750000  | 0.1128530000  |
| H | 0.4137530000  | 2.9842810000  | 0.1749850000  |
| O | 1.2636270000  | 4.4941000000  | 0.2965940000  |
| H | 1.1346940000  | 4.9682740000  | 1.1304600000  |

|   |              |               |               |
|---|--------------|---------------|---------------|
| H | 1.0621150000 | 5.1336090000  | -0.4014270000 |
| C | 3.1208480000 | -2.3917370000 | -0.1535780000 |
| N | 3.7891890000 | -3.3460620000 | -0.2071570000 |

22. 4,6 di-*tert*-butyl-2-phenylphenol, *syn* conformer S<sub>0</sub> (B3LYP/6-31+G(d,p)/scrf=acetonitrile)

|   |               |               |               |
|---|---------------|---------------|---------------|
| C | 1.2148130000  | 1.3367830000  | 0.0509810000  |
| C | -0.1845410000 | 1.3061740000  | 0.0427670000  |
| C | -0.8988430000 | 0.1031030000  | 0.0105100000  |
| C | -0.1894570000 | -1.1156880000 | -0.0377300000 |
| C | 1.2217920000  | -1.1411890000 | -0.0315060000 |
| C | 1.8772710000  | 0.1012480000  | 0.0182610000  |
| H | -0.7546130000 | 2.2299110000  | 0.0777410000  |
| H | 2.9570130000  | 0.0994220000  | 0.0275670000  |
| C | -2.3930040000 | 0.1250700000  | 0.0065470000  |
| C | -3.1353740000 | -0.4895130000 | 1.0331430000  |
| C | -3.0927090000 | 0.7875060000  | -1.0185120000 |
| C | -4.5332380000 | -0.4450810000 | 1.0316380000  |
| H | -2.6156620000 | -0.9815870000 | 1.8511510000  |
| C | -4.4887610000 | 0.8362370000  | -1.0171810000 |
| H | -2.5354880000 | 1.2613940000  | -1.8214990000 |
| C | -5.2141950000 | 0.2172970000  | 0.0064100000  |
| H | -5.0865810000 | -0.9200140000 | 1.8365790000  |
| H | -5.0096860000 | 1.3526950000  | -1.8183020000 |
| H | -6.2995720000 | 0.2529790000  | 0.0056140000  |
| O | -0.8699790000 | -2.3098710000 | -0.1178710000 |
| H | -1.8229490000 | -2.1345450000 | -0.1544310000 |
| C | 1.9594950000  | 2.6864970000  | 0.1008700000  |
| C | 1.5733830000  | 3.5366870000  | -1.1344840000 |
| C | 1.5618350000  | 3.4516350000  | 1.3872210000  |
| C | 3.4910200000  | 2.5140360000  | 0.1019650000  |
| H | 1.8588230000  | 3.0287620000  | -2.0625330000 |
| H | 0.4970120000  | 3.7309130000  | -1.1736090000 |
| H | 2.0869340000  | 4.5048900000  | -1.1049950000 |
| H | 1.8329990000  | 2.8795690000  | 2.2816000000  |
| H | 2.0804190000  | 4.4165310000  | 1.4302940000  |
| H | 0.4860420000  | 3.6490630000  | 1.4266400000  |
| H | 3.9686900000  | 3.4989760000  | 0.1371170000  |
| H | 3.8381720000  | 1.9471910000  | 0.9726620000  |
| H | 3.8459390000  | 2.0070040000  | -0.8018340000 |
| C | 2.0175910000  | -2.4664640000 | -0.0875080000 |
| C | 1.6642820000  | -3.3543990000 | 1.1326990000  |
| C | 1.7004880000  | -3.2236810000 | -1.4023600000 |
| C | 3.5427000000  | -2.2311900000 | -0.0527670000 |
| H | 1.9280220000  | -2.8464250000 | 2.0675360000  |
| H | 0.6016140000  | -3.6003940000 | 1.1621810000  |
| H | 2.2327860000  | -4.2909450000 | 1.0879980000  |
| H | 1.9812680000  | -2.6189230000 | -2.2723250000 |
| H | 2.2756550000  | -4.1563070000 | -1.4417940000 |
| H | 0.6407460000  | -3.4707180000 | -1.4825150000 |
| H | 4.0515460000  | -3.2001690000 | -0.0875400000 |
| H | 3.8912810000  | -1.6460270000 | -0.9104620000 |

H 3.8621260000 -1.7246880000 0.8643340000

23. 4,6 di-*tert*-butyl-2-phenylphenol, *anti* conformer S<sub>0</sub> (B3LYP/6-31+G(d,p)/scrff=acetonitrile)

C 1.1432820000 1.3709190000 0.0560350000  
C -0.2533420000 1.2722590000 0.0484000000  
C -0.9162940000 0.0409960000 0.0010240000  
C -0.1472870000 -1.1420010000 -0.0520460000  
C 1.2649470000 -1.1016080000 -0.0398050000  
C 1.8634450000 0.1708750000 0.0157240000  
H -0.8629910000 2.1693680000 0.0965530000  
H 2.9418160000 0.2209780000 0.0273180000  
C -2.4086200000 0.0167460000 -0.0058830000  
C -3.1424300000 -0.7605000000 0.9087770000  
C -3.1207140000 0.8255480000 -0.9097150000  
C -4.5384890000 -0.7264860000 0.9203740000  
H -2.6153490000 -1.3890790000 1.6187540000  
C -4.5184800000 0.8586850000 -0.9012760000  
H -2.5747660000 1.4254030000 -1.6324670000  
C -5.2340480000 0.0823570000 0.0146200000  
H -5.0837880000 -1.3302980000 1.6405030000  
H -5.0455180000 1.4877460000 -1.6132140000  
H -6.3199250000 0.1059450000 0.0230980000  
O -0.8729040000 -2.3099640000 -0.1375430000  
H -0.2859270000 -3.0694410000 -0.2227760000  
C 1.8192960000 2.7554760000 0.1133050000  
C 1.3979130000 3.5868140000 -1.1236420000  
C 1.3761630000 3.4980690000 1.3979510000  
C 3.3575000000 2.6603980000 0.1235380000  
H 1.7108800000 3.0935330000 -2.0507140000  
H 0.3136360000 3.7293320000 -1.1670430000  
H 1.8644090000 4.5784230000 -1.0918910000  
H 1.6722870000 2.9406630000 2.2936870000  
H 1.8439190000 4.4884430000 1.4436210000  
H 0.2915330000 3.6399440000 1.4324260000  
H 3.7848560000 3.6679140000 0.1657220000  
H 3.7268850000 2.1082100000 0.9945320000  
H 3.7433910000 2.1757110000 -0.7798720000  
C 2.1356840000 -2.3839590000 -0.0902640000  
C 1.8474370000 -3.2897560000 1.1377560000  
C 1.9011180000 -3.1574980000 -1.4166480000  
C 3.6463510000 -2.0637310000 -0.0429830000  
H 2.0899830000 -2.7586760000 2.0640690000  
H 0.8072090000 -3.6184100000 1.2213930000  
H 2.4682300000 -4.1910200000 1.0902440000  
H 2.1589780000 -2.5266360000 -2.2735610000  
H 2.5378660000 -4.0482800000 -1.4455810000  
H 0.8720100000 -3.4975890000 -1.5714140000  
H 4.2084140000 -3.0027180000 -0.0723780000  
H 3.9674510000 -1.4611330000 -0.8985310000  
H 3.9271570000 -1.5402310000 0.8764110000

24. 2-phenylphenol with 3 explicit water molecules (**1-3W**) in  $S_0$  (B3LYP/6-311+G(d,p)/SMD=water)

|   |               |               |               |
|---|---------------|---------------|---------------|
| C | 1.1862690000  | 0.4982470000  | -0.0451460000 |
| C | 2.4182420000  | 1.1546070000  | -0.0262270000 |
| C | 2.4760360000  | 2.5398620000  | 0.0907550000  |
| C | 1.2969890000  | 3.2802340000  | 0.1751020000  |
| C | 0.0717290000  | 2.6196710000  | 0.1625720000  |
| C | -0.0155950000 | 1.2217730000  | 0.0716460000  |
| H | 3.3232950000  | 0.5653280000  | -0.1190140000 |
| H | 3.4392820000  | 3.0371110000  | 0.1048790000  |
| H | 1.3300960000  | 4.3602300000  | 0.2591480000  |
| H | -0.8467330000 | 3.1893890000  | 0.2500520000  |
| O | 1.2214950000  | -0.8754670000 | -0.1702890000 |
| H | 0.4378420000  | -1.2498850000 | -0.6439350000 |
| O | -0.6442900000 | -2.1710760000 | -1.6853170000 |
| H | -1.5438060000 | -2.0385800000 | -1.3558640000 |
| H | -0.4855150000 | -3.1199130000 | -1.5939000000 |
| O | 1.9077330000  | -2.4541080000 | 2.1289380000  |
| H | 1.6638480000  | -1.9069780000 | 1.3602440000  |
| H | 2.7086850000  | -2.9137060000 | 1.8490710000  |
| O | 3.5510590000  | -2.2303390000 | -1.2121980000 |
| H | 2.7948270000  | -1.7208880000 | -0.8685990000 |
| H | 4.2007470000  | -1.5611410000 | -1.4590190000 |
| C | -1.3504640000 | 0.5613160000  | 0.1154720000  |
| C | -2.3601810000 | 0.9386900000  | -0.7812670000 |
| C | -1.6366870000 | -0.4234300000 | 1.0729860000  |
| C | -3.6194230000 | 0.3422060000  | -0.7283530000 |
| H | -2.1538200000 | 1.6957250000  | -1.5297210000 |
| C | -2.8964130000 | -1.0171730000 | 1.1277800000  |
| H | -0.8721770000 | -0.7194600000 | 1.7822340000  |
| C | -3.8915420000 | -0.6387990000 | 0.2253460000  |
| H | -4.3861250000 | 0.6424220000  | -1.4340280000 |
| H | -3.1015140000 | -1.7723020000 | 1.8785260000  |
| H | -4.8706690000 | -1.1026460000 | 0.2668610000  |

25. Anion of 2-phenylphenol with 3 explicit water molecules (**1-3W**) in  $S_0$  (B3LYP/6-311+G(d,p)/SMD=water)

|   |               |               |               |
|---|---------------|---------------|---------------|
| C | 1.2702530000  | 0.3009880000  | 0.0233780000  |
| C | 2.5409660000  | 0.9260850000  | 0.0371230000  |
| C | 2.6838600000  | 2.3067070000  | 0.1157220000  |
| C | 1.5559880000  | 3.1281240000  | 0.1791090000  |
| C | 0.2943830000  | 2.5354910000  | 0.1716230000  |
| C | 0.1197490000  | 1.1453750000  | 0.1070880000  |
| H | 3.4187440000  | 0.2907050000  | -0.0250790000 |
| H | 3.6781140000  | 2.7423550000  | 0.1245430000  |
| H | 1.6552370000  | 4.2058000000  | 0.2412260000  |
| H | -0.5877210000 | 3.1649740000  | 0.2357190000  |
| O | 1.1763740000  | -1.0185490000 | -0.0873020000 |
| O | -0.4729090000 | -2.1253230000 | -1.9250750000 |
| H | -1.3489040000 | -1.7413300000 | -1.7985180000 |

|   |               |               |               |
|---|---------------|---------------|---------------|
| H | 0.0879210000  | -1.6875450000 | -1.2334240000 |
| O | 1.4085590000  | -2.4532290000 | 2.1923430000  |
| H | 1.3003720000  | -1.9118790000 | 1.3690720000  |
| H | 0.5282400000  | -2.4786110000 | 2.5850600000  |
| O | 3.2024840000  | -2.3721020000 | -1.2544410000 |
| H | 2.4945260000  | -1.8389810000 | -0.8042190000 |
| H | 4.0306840000  | -2.0163550000 | -0.9119250000 |
| C | -1.2624290000 | 0.5903160000  | 0.1109800000  |
| C | -2.2263550000 | 1.0796150000  | -0.7852740000 |
| C | -1.6551210000 | -0.4058080000 | 1.0198530000  |
| C | -3.5330620000 | 0.5911510000  | -0.7773050000 |
| H | -1.9457520000 | 1.8419910000  | -1.5038950000 |
| C | -2.9606850000 | -0.8932020000 | 1.0311170000  |
| H | -0.9351750000 | -0.7940320000 | 1.7305150000  |
| C | -3.9064470000 | -0.3992030000 | 0.1308440000  |
| H | -4.2567380000 | 0.9822170000  | -1.4844290000 |
| H | -3.2410340000 | -1.6581760000 | 1.7472820000  |
| H | -4.9211800000 | -0.7813580000 | 0.1383090000  |

26. 4-OMe-2-phenylphenol with 3 explicit water molecules (**2-3W**) in  $S_0$  (B3LYP/6-311+G(d,p)/SMD=water)

|   |               |               |               |
|---|---------------|---------------|---------------|
| C | -0.5120750000 | 0.8224820000  | -0.0812150000 |
| C | -1.7959870000 | 1.3558000000  | -0.0980810000 |
| C | -2.9224970000 | 0.5364950000  | -0.0218550000 |
| C | -2.7513540000 | -0.8455910000 | 0.0549680000  |
| C | -1.4628530000 | -1.3829620000 | 0.0777150000  |
| C | -0.3260780000 | -0.5701920000 | 0.0293840000  |
| H | -1.9150750000 | 2.4297440000  | -0.1837870000 |
| H | -3.9061060000 | 0.9853160000  | -0.0352850000 |
| H | -1.3481720000 | -2.4575160000 | 0.1618360000  |
| O | 0.5439600000  | 1.7163410000  | -0.1601580000 |
| H | 1.3055800000  | 1.3681180000  | -0.6860660000 |
| O | 2.6536790000  | 1.0625750000  | -1.7725150000 |
| H | 3.0862890000  | 0.2572030000  | -1.4567810000 |
| H | 3.3232340000  | 1.7535500000  | -1.6809960000 |
| O | 1.3973500000  | 3.0674920000  | 2.2051680000  |
| H | 1.1062240000  | 2.5934240000  | 1.4038970000  |
| H | 1.1189270000  | 3.9794530000  | 2.0580070000  |
| O | 0.1189210000  | 4.4081490000  | -1.0982490000 |
| H | 0.2069590000  | 3.4872510000  | -0.7905290000 |
| H | -0.7898720000 | 4.4702580000  | -1.4161090000 |
| C | 1.0233290000  | -1.1983990000 | 0.1005910000  |
| C | 1.3716850000  | -2.2349950000 | -0.7770350000 |
| C | 1.9612880000  | -0.7873170000 | 1.0596370000  |
| C | 2.6252780000  | -2.8409220000 | -0.7022890000 |
| H | 0.6607820000  | -2.5602880000 | -1.5283680000 |
| C | 3.2130860000  | -1.3950040000 | 1.1355970000  |
| H | 1.7066680000  | 0.0042370000  | 1.7547780000  |
| C | 3.5510980000  | -2.4220460000 | 0.2533210000  |
| H | 2.8784170000  | -3.6377750000 | -1.3928180000 |
| H | 3.9228820000  | -1.0684770000 | 1.8875770000  |

|   |               |               |               |
|---|---------------|---------------|---------------|
| H | 4.5259910000  | -2.8928980000 | 0.3119060000  |
| O | -3.7846420000 | -1.7552920000 | 0.1217850000  |
| C | -5.1255270000 | -1.2498910000 | 0.1156550000  |
| H | -5.7712660000 | -2.1248130000 | 0.1704180000  |
| H | -5.3077110000 | -0.6068780000 | 0.9812740000  |
| H | -5.3342460000 | -0.6987840000 | -0.8055620000 |

**27.** Anion of **2-3W** in  $S_0$  (B3LYP/6-311+G(d,p)/SMD=water)

|   |               |               |               |
|---|---------------|---------------|---------------|
| C | -0.4694470000 | 0.9193360000  | 0.0054280000  |
| C | -1.7916370000 | 1.4062760000  | -0.0040070000 |
| C | -2.9083760000 | 0.5690950000  | 0.0252780000  |
| C | -2.7244950000 | -0.8120700000 | 0.0598780000  |
| C | -1.4286780000 | -1.3272630000 | 0.0770990000  |
| C | -0.3012360000 | -0.4982540000 | 0.0627880000  |
| H | -1.9388850000 | 2.4805620000  | -0.0447820000 |
| H | -3.8985470000 | 1.0060630000  | 0.0179970000  |
| H | -1.3005050000 | -2.4036980000 | 0.1213550000  |
| O | 0.5645410000  | 1.7604790000  | -0.0617760000 |
| O | 2.5260240000  | 1.3380820000  | -1.8645140000 |
| H | 2.8480970000  | 0.4379650000  | -1.7345320000 |
| H | 1.8058520000  | 1.4411540000  | -1.1871910000 |
| O | 1.3573390000  | 2.8835810000  | 2.2492800000  |
| H | 1.0699810000  | 2.4413060000  | 1.4070330000  |
| H | 1.8889320000  | 2.2208020000  | 2.7052430000  |
| O | 0.1986430000  | 4.1360140000  | -1.2739670000 |
| H | 0.2804720000  | 3.2626310000  | -0.8033250000 |
| H | -0.5288260000 | 4.5873350000  | -0.8305710000 |
| C | 1.0479470000  | -1.1284460000 | 0.0910000000  |
| C | 1.3755160000  | -2.1496080000 | -0.8148960000 |
| C | 2.0161930000  | -0.7465130000 | 1.0336990000  |
| C | 2.6262900000  | -2.7665470000 | -0.7831830000 |
| H | 0.6475080000  | -2.4547360000 | -1.5586110000 |
| C | 3.2647690000  | -1.3645080000 | 1.0690250000  |
| H | 1.7849790000  | 0.0315370000  | 1.7514310000  |
| C | 3.5775520000  | -2.3757210000 | 0.1588750000  |
| H | 2.8570920000  | -3.5494580000 | -1.4975320000 |
| H | 3.9941040000  | -1.0577980000 | 1.8110240000  |
| H | 4.5505120000  | -2.8537120000 | 0.1851220000  |
| O | -3.7540120000 | -1.7443120000 | 0.0895270000  |
| C | -5.0954750000 | -1.2501400000 | 0.0747410000  |
| H | -5.2967910000 | -0.6757170000 | -0.8346760000 |
| H | -5.7381900000 | -2.1293680000 | 0.0966660000  |
| H | -5.2996060000 | -0.6294480000 | 0.9526020000  |

**28.** 4-COOMe-2-phenylphenol with 3 explicit water molecules (**4-3W**) in  $S_0$  (B3LYP/6-311+G(d,p)/SMD=water)

|   |               |               |               |
|---|---------------|---------------|---------------|
| C | 0.2550910000  | 1.0225740000  | -0.1133050000 |
| C | -0.8534880000 | 1.8757260000  | -0.1211500000 |
| C | -2.1389260000 | 1.3637970000  | -0.0630170000 |
| C | -2.3369110000 | -0.0228790000 | -0.0056980000 |

|   |               |               |               |
|---|---------------|---------------|---------------|
| C | -1.2218180000 | -0.8668780000 | 0.0166240000  |
| C | 0.0839480000  | -0.3741430000 | -0.0163390000 |
| H | -0.6859360000 | 2.9438680000  | -0.1914680000 |
| H | -2.9840980000 | 2.0389410000  | -0.0747050000 |
| H | -1.3726130000 | -1.9371320000 | 0.0855430000  |
| O | 1.4813310000  | 1.6214520000  | -0.1924270000 |
| H | 2.1943470000  | 1.0539190000  | -0.5841300000 |
| O | 3.5813100000  | 0.4908500000  | -1.4781660000 |
| H | 3.7458530000  | -0.4266960000 | -1.2203960000 |
| H | 4.3776940000  | 0.9682630000  | -1.2096930000 |
| O | 2.4649340000  | 2.9116940000  | 2.2118650000  |
| H | 2.1278080000  | 2.4783570000  | 1.4084090000  |
| H | 2.4019240000  | 3.8548770000  | 2.0182760000  |
| O | 1.8123460000  | 4.3381780000  | -1.1763640000 |
| H | 1.6468610000  | 3.4317690000  | -0.8627180000 |
| H | 0.9687880000  | 4.6226320000  | -1.5483960000 |
| C | 1.2309770000  | -1.3217850000 | 0.0700730000  |
| C | 1.3674910000  | -2.3589510000 | -0.8625910000 |
| C | 2.1743760000  | -1.2136040000 | 1.1021640000  |
| C | 2.4261800000  | -3.2616990000 | -0.7708290000 |
| H | 0.6476280000  | -2.4513180000 | -1.6683610000 |
| C | 3.2296270000  | -2.1191550000 | 1.1958320000  |
| H | 2.0775340000  | -0.4230940000 | 1.8379620000  |
| C | 3.3612230000  | -3.1438430000 | 0.2576210000  |
| H | 2.5207890000  | -4.0548740000 | -1.5041640000 |
| H | 3.9470140000  | -2.0255510000 | 2.0035300000  |
| H | 4.1841990000  | -3.8460850000 | 0.3292490000  |
| C | -3.6856390000 | -0.6305190000 | 0.0445540000  |
| O | -3.9013850000 | -1.8337070000 | 0.0838340000  |
| O | -4.6753210000 | 0.2787980000  | 0.0432360000  |
| C | -6.0291870000 | -0.2294770000 | 0.0898910000  |
| H | -6.6655210000 | 0.6522470000  | 0.0810510000  |
| H | -6.2293760000 | -0.8511830000 | -0.7829980000 |
| H | -6.1862670000 | -0.8020550000 | 1.0042060000  |

29. Anion of **4-3W** in S<sub>0</sub> (B3LYP/6-311+G(d,p)/SMD=water)

|   |               |               |               |
|---|---------------|---------------|---------------|
| C | 0.2993570000  | 1.1199100000  | -0.0356880000 |
| C | -0.8733540000 | 1.9245280000  | -0.0583170000 |
| C | -2.1412290000 | 1.3791470000  | -0.0278440000 |
| C | -2.3144990000 | -0.0162750000 | 0.0254870000  |
| C | -1.1676640000 | -0.8268780000 | 0.0571480000  |
| C | 0.1203750000  | -0.3036200000 | 0.0408170000  |
| H | -0.7464040000 | 3.0005790000  | -0.1115230000 |
| H | -3.0041130000 | 2.0331370000  | -0.0483800000 |
| H | -1.2942580000 | -1.9020420000 | 0.1122030000  |
| O | 1.4844100000  | 1.6728070000  | -0.1040400000 |
| O | 3.3495160000  | 0.7595730000  | -1.8890380000 |
| H | 3.3938910000  | -0.1998900000 | -1.7955910000 |
| H | 2.6727040000  | 1.0352430000  | -1.2249850000 |
| O | 2.5971490000  | 2.5768240000  | 2.2380640000  |
| H | 2.1968590000  | 2.2297190000  | 1.4073830000  |



|   |               |               |               |
|---|---------------|---------------|---------------|
| H | 2.9534950000  | 1.7966880000  | 2.6791830000  |
| O | 1.7276530000  | 4.1974350000  | -1.1096140000 |
| H | 1.5912170000  | 3.2928800000  | -0.7315080000 |
| H | 0.9175920000  | 4.6744350000  | -0.8943470000 |
| C | 1.2853010000  | -1.2311320000 | 0.0837350000  |
| C | 1.3863960000  | -2.2874970000 | -0.8343100000 |
| C | 2.2927080000  | -1.0965460000 | 1.0520980000  |
| C | 2.4587060000  | -3.1789190000 | -0.7889810000 |
| H | 0.6245430000  | -2.4042620000 | -1.5974450000 |
| C | 3.3623190000  | -1.9882300000 | 1.1007960000  |
| H | 2.2328710000  | -0.2948500000 | 1.7789000000  |
| C | 3.4522630000  | -3.0322810000 | 0.1785620000  |
| H | 2.5181160000  | -3.9846620000 | -1.5126460000 |
| H | 4.1256480000  | -1.8693480000 | 1.8622180000  |
| H | 4.2871490000  | -3.7232770000 | 0.2146000000  |
| C | -3.6353200000 | -0.6517820000 | 0.0585800000  |
| O | -3.8346670000 | -1.8627090000 | 0.1065660000  |
| O | -4.6582980000 | 0.2330420000  | 0.0310390000  |
| C | -5.9948090000 | -0.3133530000 | 0.0606580000  |
| H | -6.6576650000 | 0.5486620000  | 0.0314620000  |
| H | -6.1661710000 | -0.9503110000 | -0.8078050000 |
| H | -6.1548990000 | -0.8809160000 | 0.9780290000  |

**30.** 4-CN-2-phenylphenol with 3 explicit water molecules (**5-3W**) in  $S_0$  (B3LYP/6-311+G(d,p)/SMD=water)

|   |               |               |               |
|---|---------------|---------------|---------------|
| C | -0.6297020000 | 0.8507420000  | -0.1018150000 |
| C | -1.8867890000 | 1.4663980000  | -0.0974370000 |
| C | -3.0427730000 | 0.7105070000  | -0.0195630000 |
| C | -2.9466590000 | -0.6881570000 | 0.0471260000  |
| C | -1.6873170000 | -1.3024240000 | 0.0582110000  |
| C | -0.5125770000 | -0.5516140000 | 0.0030430000  |
| H | -1.9379560000 | 2.5457160000  | -0.1743930000 |
| H | -4.0132910000 | 1.1904480000  | -0.0217130000 |
| H | -1.6213860000 | -2.3808620000 | 0.1344410000  |
| O | 0.4491390000  | 1.6802430000  | -0.2014020000 |
| H | 1.2585830000  | 1.2637120000  | -0.5988380000 |
| O | 2.7025810000  | 0.9983600000  | -1.5193030000 |
| H | 3.1239810000  | 0.1842390000  | -1.2112740000 |
| H | 3.3514670000  | 1.6932980000  | -1.3455360000 |
| O | 1.2851050000  | 3.1029590000  | 2.1869030000  |
| H | 0.9926810000  | 2.6305310000  | 1.3881570000  |
| H | 1.0337370000  | 4.0207210000  | 2.0269520000  |
| O | 0.2074370000  | 4.4248530000  | -1.1594040000 |
| H | 0.2306230000  | 3.5031520000  | -0.8489770000 |
| H | -0.6945410000 | 4.5488640000  | -1.4788830000 |
| C | 0.8051680000  | -1.2441080000 | 0.0724820000  |
| C | 1.1380210000  | -2.2323660000 | -0.8634890000 |
| C | 1.7180900000  | -0.9432380000 | 1.0935990000  |
| C | 2.3601020000  | -2.8991490000 | -0.7857350000 |
| H | 0.4421950000  | -2.4706320000 | -1.6602200000 |
| C | 2.9377820000  | -1.6127980000 | 1.1721630000  |

|   |               |               |               |
|---|---------------|---------------|---------------|
| H | 1.4694270000  | -0.1881050000 | 1.8306630000  |
| C | 3.2638940000  | -2.5902510000 | 0.2308960000  |
| H | 2.6058750000  | -3.6575420000 | -1.5206290000 |
| H | 3.6309450000  | -1.3737280000 | 1.9708930000  |
| H | 4.2139530000  | -3.1091100000 | 0.2913090000  |
| C | -4.1246140000 | -1.4847910000 | 0.1163130000  |
| N | -5.0851650000 | -2.1320750000 | 0.1727040000  |

**31.** Anion of **5-3W** in  $S_0$  (B3LYP/6-311+G(d,p)/SMD=water)

|   |               |               |               |
|---|---------------|---------------|---------------|
| C | -0.5791940000 | 0.9597590000  | -0.0258770000 |
| C | -1.8716290000 | 1.5554970000  | -0.0442770000 |
| C | -3.0292780000 | 0.8064090000  | -0.0066250000 |
| C | -2.9515710000 | -0.5984430000 | 0.0506770000  |
| C | -1.6872950000 | -1.2138380000 | 0.0779760000  |
| C | -0.5101720000 | -0.4740850000 | 0.0521680000  |
| H | -1.9285060000 | 2.6370430000  | -0.0991890000 |
| H | -3.9979560000 | 1.2926290000  | -0.0231200000 |
| H | -1.6324340000 | -2.2950150000 | 0.1363180000  |
| O | 0.4916240000  | 1.7060990000  | -0.0962940000 |
| O | 2.6017570000  | 1.2105280000  | -1.7748940000 |
| H | 2.9287870000  | 0.3211540000  | -1.5932190000 |
| H | 1.8436420000  | 1.3220790000  | -1.1532070000 |
| O | 1.4072920000  | 2.8213910000  | 2.2419010000  |
| H | 1.0810290000  | 2.4018880000  | 1.4124590000  |
| H | 1.8598330000  | 2.1102190000  | 2.7107180000  |
| O | 0.3773090000  | 4.1904860000  | -1.2252670000 |
| H | 0.3593950000  | 3.3018990000  | -0.7915240000 |
| H | -0.3514710000 | 4.6752500000  | -0.8206840000 |
| C | 0.7957440000  | -1.1885900000 | 0.0839720000  |
| C | 1.0483290000  | -2.2420880000 | -0.8078760000 |
| C | 1.7922420000  | -0.8529930000 | 1.0140460000  |
| C | 2.2567000000  | -2.9379270000 | -0.7738020000 |
| H | 0.2962040000  | -2.5102650000 | -1.5417450000 |
| C | 2.9985060000  | -1.5496880000 | 1.0508660000  |
| H | 1.6176330000  | -0.0491270000 | 1.7190750000  |
| C | 3.2379810000  | -2.5934020000 | 0.1552040000  |
| H | 2.4313630000  | -3.7453930000 | -1.4765120000 |
| H | 3.7522850000  | -1.2782960000 | 1.7819670000  |
| H | 4.1784850000  | -3.1323210000 | 0.1826560000  |
| C | -4.1298810000 | -1.3847520000 | 0.0920660000  |
| N | -5.0978620000 | -2.0278480000 | 0.1259050000  |
